# Supplementary material for: Paper-based chemical reaction arrays as an effective tool for geographical indication of turmerics
Source: Royal Society of Chemistry journal article supplement (doi:10.1039/c8ra09248f), 2018-01-01
Supplement: c8ra09248f1.xlsx [file c8ra09248f1.xlsx]

## Sheet: RGB dataset
code	sample	SR1	SG1	SB1	SR2	SG2	SB2	SR3	SG3	SB3	SR4	SG4	SB4	SR5	SG5	SB5	SR6	SG6	SB6	SR7	SG7	SB7	SR9	SG9	SB9	SR10	SG10	SB10	SR11	SG11	SB11	SR12	SG12	SB12	FR1	FG1	FB1	FR2	FG2	FB2	FR3	FG3	FB3	FR4	FG4	FB4	FR5	FG5	FB5
1	cur1-1	250.105	241.416	128.204	249.999	238.37	120.273	250.885	234.961	127.297	171.873	106.858	115.461	250.097	230.377	115.758	240.653	188.236	103.361	232.163	124.165	106.323	243.932	235.25	109.613	232.392	189.65	117.131	246.111	232.689	103.288	244.289	179.424	71.652	120.43	174.122	14.842	121.25	168.05	10.054	99.222	129.209	3.457	19.87	3.511	0.431	30.399	54.114	0.591
1	cur1-2	250.145	241.763	129.172	249.648	235.83	117.944	248.173	217.364	108.763	171.519	107.255	116.735	249.395	225.212	110.294	237.462	186.373	99.118	230.624	121.068	97.544	244.375	235.934	110.988	233.457	190.464	115.568	247.301	233.948	107.264	242.55	178.704	66.685	133.316	187.576	17.388	134.826	188.436	17.195	117.854	149.499	2.996	17.717	3.44	0.6	32.937	61.843	0.549
1	cur1-3	249.114	240.276	132.567	249.844	242.203	132.366	248.851	229.262	118.563	183.807	122.791	128.576	248.928	221.3	109.766	228.777	176.12	95.256	225.426	120.154	109.685	244.475	238.144	118.767	221.546	180.122	127.454	245.814	235.079	111.535	242.33	186.871	70.73	139.277	194.436	21.138	135.048	188.878	19.593	111.038	135.555	3.912	16.863	3.316	0.48	33.368	60.735	0.735
1	cur1-4	249.638	241.982	135.022	250.21	234.088	117.696	248.791	227.953	119.651	182.09	121.183	127.892	249.253	225.624	114.265	234.893	182.38	100.747	227.088	119.948	106.885	244.892	239.737	122.607	226.142	186.204	133.454	246.094	235.844	113.179	244.89	191.41	74.1	132.138	190.884	22.354	129.234	187.099	21.193	109.205	147.154	5.364	27.216	3.494	0.408	19.951	37.852	0.628
1	cur1-5	249.592	241.603	134.521	249.376	234.215	117.641	248.134	228.955	122.458	181.952	121.194	130.033	248.385	220.449	110.163	231.68	178.104	95.098	225.976	121.007	106.691	244.522	236.88	114.859	225.753	184.673	132.909	246.408	236.905	115.495	245.03	193.557	77.245	132.284	191.254	24.536	128.553	182.099	17.332	99.184	138.582	7.241	23.776	4.243	0.398	19.74	40.469	0.612
1	cur1-6	249.726	241.601	133.005	249.357	231.698	112.497	248.649	227.511	113.037	176.072	113.385	120.422	249.092	224.105	106.773	239.913	196.73	97.421	230.429	121	103.066	244.604	237.353	116.092	220.398	176.053	121.016	246.236	233.163	104.894	246.103	196.913	79.408	131.364	186.87	16.942	128.249	180.808	13.848	108.255	148.762	6.297	25.72	3.846	0.33	21.154	41.136	0.569
1	cur1-7	249.777	240.722	129.446	248.498	225.782	104.406	228.781	180.502	107.075	171.248	107.315	114.641	248.188	220.683	103.12	232.318	179.688	82.366	227.884	114.561	95.289	244.73	238.299	118.349	220.663	175.779	118.233	246.377	232.353	104.002	239.796	175.689	61.157	132.744	192.316	25.373	128.895	181.048	14.514	108.971	146.456	5.235	23.862	3.861	0.322	27.37	52.348	0.681
1	cur1-8	249.8	241.693	132.576	249.091	225.769	105.728	248.967	227.461	112.717	174.469	112.144	118.683	248.327	215.297	97.616	239.806	196.068	97.05	229.257	115.403	93.336	244.433	237.123	114.558	225.716	181.204	124.208	245.733	234.103	106.45	245.089	189.789	70.913	132.894	189.034	21.262	126.203	176.076	12.979	89.44	102.896	4.671	15.886	2.875	0.452	29.291	53.982	0.764
1	cur1-9	250.403	238.877	126.515	249.485	227.202	107.598	249.498	225.464	113.84	177.303	115.46	120.759	249.41	223.594	105.958	234.898	187.222	94.583	226.051	122.293	120.973	243.975	232.619	103.762	214.711	166.083	106.767	247.979	239.627	122.585	243.085	183.745	66.988	133.284	192.227	22.448	126.576	175.711	10.615	110.701	147.26	4.768	21.915	3.399	0.4	28.955	53.203	0.549
2	cur2-1	250.039	238.415	123.403	250.007	236.398	117.113	249.431	215.529	115.23	171.55	106.862	114.84	248.917	223.083	108.007	229.41	181.048	104.217	230.035	119.485	102.474	243.691	231.094	98.68	223.877	169.424	104.112	246.93	235.225	110.139	243.962	173.305	85.429	136.002	190.299	17.359	137.847	186.336	14.034	151.389	173.595	6.375	18.385	3.278	0.534	34.449	62.469	0.684
2	cur2-2	250.339	241.1	126.406	250.026	237.711	119.42	249.548	225.702	118.018	173.012	107.855	118.022	250.028	230.032	114.068	234.708	181.534	97.698	228.302	115.636	100.58	243.1	233.995	105.817	228.668	180.118	106.381	246.393	232.861	103.297	245.858	183.775	92.638	134.787	185.884	13.792	135.088	182.727	12.182	114.545	151.651	5.291	14.335	2.533	0.449	35.773	61.805	0.652
2	cur2-3	249.069	239.227	123.716	249.164	238.342	122.101	248.381	224.186	110.566	169.627	106.707	115.723	249.08	224.494	109.011	231.734	177.092	93.831	228.271	116.036	101.766	242.858	231.556	98.877	233.033	187.494	110.054	247.752	233.347	106.967	243.009	172.909	84.064	141.184	193.159	16.872	139.696	190.598	15.615	124.722	151.49	4.514	21.622	3.665	0.399	34.869	63.002	0.641
2	cur2-4	249.701	241.094	127.385	249.612	233.668	115.387	249.625	226.159	113.802	174.968	112.87	120.801	248.777	225.326	111.697	228.198	176.561	98.358	222.015	108.313	109.041	242.337	235.173	108.812	215.356	164.247	104.117	246.781	235.515	111.431	247.473	200.93	104.396	141.87	197.576	25.416	136.926	187.89	19.389	120.497	152.381	5.25	17.587	3.639	0.492	33.074	61.936	0.7
2	cur2-5	249.725	238.673	124.737	249.5	236.472	123.187	245.886	218.556	108.481	174.919	113.708	121.967	248.718	225.736	114.357	224.066	168.441	95.586	220.558	109.219	113.079	241.789	232.93	103.492	216.32	167.371	109.106	246.29	234.347	109.193	245.928	198.144	104.879	143.063	196.748	20.343	141.085	190.067	13.764	126.313	155.991	4.705	24.303	3.321	0.439	25.765	48.665	0.731
2	cur2-6	250.133	237.636	120.113	249.408	227.089	109.888	247.731	222.749	107.045	170.862	106.812	113.031	248.56	217.423	98.606	234.783	183.833	89.079	224.349	104.889	95.228	242.863	231.215	97.905	213.141	160.971	99.035	245.704	229.595	94.92	244.003	178.401	79.241	138.636	191.338	14.934	142.384	192.68	14.506	129.676	167.434	7.541	22.103	3.442	0.385	26.242	47.824	0.584
2	cur2-7	250.049	239.64	122.793	249.492	228.265	110.261	249.155	223.936	107.116	169.737	105.714	112.278	247.992	208.884	91.211	230.472	177.604	83.949	222.659	102.641	93.106	242.524	231.357	98.28	213.734	161.972	97.994	245.427	230.421	96.858	246.353	189.866	89.38	138.913	190.672	18.903	129.711	176.723	12.477	118.582	153.621	6.732	17.759	3.455	0.425	33.65	58.762	0.653
2	cur2-8	249.674	238.89	121.76	249.806	230.806	112.681	247.816	221.281	102.537	169.321	104.899	111.116	249.159	218.821	101.173	232.514	183.407	86.255	222.066	103.136	90.72	242.503	230.803	97.341	212.731	159.52	97.141	246.168	230.767	99.114	247.394	192.136	90.518	141.68	194.058	19.706	132.395	180.123	10.481	119.133	150.806	3.332	19.111	3.224	0.456	34.567	57.626	0.641
2	cur2-9	249.7	235.995	119.754	248.692	224.838	104.745	248.884	228.995	120.424	164.599	101.074	108.28	248.49	217.175	101.679	234.311	195.662	111.59	226.221	121.597	109.393	242.394	230.695	96.846	212.361	159.873	98.48	246.664	234.368	107.682	247.843	205.14	104.884	134.916	186.568	15.406	136.697	184.973	13.464	122.053	153.878	4.576	18.915	3.424	0.506	33.929	58.033	0.693
3	cur3-1	249.332	230.618	107.702	248.948	227.697	104.38	247.822	211.685	93.959	154.857	98.876	110.747	248.589	219.425	98.786	205.174	152.678	70.989	205.69	93.844	88.158	243.524	228.515	91.668	223.433	174.285	90.332	247.685	227.503	96.154	241.961	173.947	76.927	158.1	190.607	6.409	157.883	190.461	6.685	129.083	143.517	2.67	12.049	1.705	0.235	38.372	59.441	0.566
3	cur3-2	249.926	232.546	110.392	249.707	231.508	107.537	248.92	215.549	97.523	156.461	100.154	113.396	249.716	225.185	105.091	212.443	161.812	77.171	210.445	99.629	91.658	243.729	227.561	88.737	230.601	181.578	95.894	247.863	226.425	93.234	244.772	185.264	81.028	156.052	185.174	4.95	157.023	186.249	5.928	136.716	152.644	3.308	12.021	1.705	0.224	40.394	61.894	0.723
3	cur3-3	249.46	231.468	109.33	249.376	230.15	107.337	247.965	212.586	94.651	154.864	98.927	112.039	249.021	222.449	102.82	207.582	156.573	74.293	208.596	96.633	89.624	243.812	228.594	91.013	228.382	176.234	99.225	247.523	226.668	93.065	247.076	192.699	86.533	153.542	187.271	6.928	153.482	183.718	4.808	135.756	152.689	3.029	11.962	1.669	0.287	37.603	57.319	0.806
3	cur3-4	248.951	228.629	106.768	248.978	227.045	104.175	247.678	213.275	96.555	161.247	104.55	115.651	248.28	221.483	103.347	196.613	146.988	75.783	205.212	97.903	99.638	242.176	227.257	87.678	218.67	165.588	97.448	247.716	227.953	98.316	246.386	197.353	91.909	150.916	183.65	6.019	150.322	181.827	5.141	131.626	146.569	2.053	12.367	2.106	0.318	27.933	43.061	0.553
3	cur3-5	249.646	231.069	110.643	249.623	228.209	106.437	248.881	216.885	104.372	164.701	107.567	119.94	247.976	220.486	103.905	203.024	153.886	81.228	206.86	98.059	96.897	243.148	228.019	90.016	222.114	167.852	99.177	248.215	228.585	99.431	246.704	196.598	91.661	153.562	183.234	4.305	151.719	180.989	2.985	134.756	149.074	1.257	12.578	2.14	0.367	27.088	43.542	0.647
3	cur3-6	249.246	231.704	111.102	249.481	229.861	109.377	246.269	211.596	97.328	162.872	106.315	119.051	247.168	217.868	100.592	199.549	147.71	76.898	201.043	93.278	92.799	242.304	229.559	94.163	214.848	157.921	91.287	247.989	229.766	99.549	246.811	197.372	93.175	155.171	190.924	6.355	154.104	185.525	3.961	133.475	149.227	1.739	12.496	1.89	0.291	26.962	43.279	0.563
3	cur3-7	249.675	231.911	109.54	249.11	227.834	104.253	249.159	219.608	100.663	167.226	111.74	124.744	248.501	221.708	98.827	210.003	160.815	69.952	205.293	91.242	86.244	242.67	228.631	91.164	217.325	164.51	95.545	247.47	228.729	95.121	247.863	202.903	90.387	155.569	189.23	8.135	155.373	188.08	7.316	134.098	156.033	4.558	20.006	3.558	0.527	36.359	56.316	0.598
3	cur3-8	249.32	231.933	108.818	249.609	229.188	104.783	248.454	215.53	94.454	159.171	103.214	114.773	248.671	221.601	99.337	205.319	157.485	67.808	206.266	92.167	86.693	242.844	228.68	90.674	217.445	164.242	93.636	247.424	227.938	93.391	248.007	202.668	90.982	153.431	188.241	8.417	155.79	186.355	5.711	134.342	151.397	2.237	13.23	2.35	0.491	34.389	57.109	0.535
3	cur3-9	249.326	231.374	108.733	249.171	228.466	104.305	249.185	218.265	97.928	160.421	104.504	118.2	249.243	223.934	101.569	211.511	162.4	72.462	205.375	89.822	88.689	242.655	227.811	88.388	217.338	162.673	93.164	246.826	228.781	93.431	247.871	200.446	88.001	144.025	177.721	8.273	136.764	170.964	8.26	120.096	138.725	3.081	14.149	3.435	0.654	34.311	57.561	0.607
4	cur4-1	248.267	242.742	134.777	249.104	242.498	131.934	250.291	237.219	120.983	188.586	130.886	140.595	250.746	239.387	124.64	241.095	199.714	124.9	235.121	131.8	137.468	242.848	238.14	118.467	237.057	199.942	136.198	245.037	238.025	118.202	250.64	214.56	117.668	141.695	200.749	35.194	136.396	194.136	29.318	127.394	174.016	16.408	34.689	5.719	0.963	21.979	46.935	0.63
4	cur4-2	247.843	243.322	138.957	248.528	241.905	129.539	250.305	237.622	120.567	189.474	132.347	143.236	251.091	241.1	126.799	245.057	206.469	130.282	235.547	132.026	142.149	242.546	239.029	121.804	240.523	204.473	141.356	245.436	239.394	122.59	250.854	220.856	118.955	132.835	196.01	29.687	137.725	199.663	34.06	144.537	179.951	15.487	33.194	6.774	1.153	26.267	57.428	0.717
4	cur4-3	248.85	244.362	147.411	248.487	243.074	144.207	249.524	238.636	136.394	201.269	148.644	155.252	250.814	240.495	134.345	237.967	195.537	130.739	230.747	130.829	142.072	243.741	240.545	124.577	234.028	198.974	142.632	248.79	242.146	139.089	250.364	237.409	131.431	143.856	203.163	35.403	139.112	195.501	27.115	125.099	170.826	12.628	26.069	5.005	0.517	23.27	50.624	0.641
4	cur4-4	248.631	244.575	146.831	248.613	243.712	141.588	250.266	238.312	138.093	202.923	150.362	159.108	252.032	240.525	132.204	246.508	214.669	134.907	234.177	135.926	141.559	245.267	242.817	135.05	239.586	207.264	151.787	248.741	243.018	139.328	250.84	237.243	129.363	134.559	197.926	32.625	133.673	196.878	35.681	117.697	168.725	18.177	31.265	7.057	1.2	14.328	36.912	0.529
4	cur4-5	248.657	244.64	148.378	249.034	244.232	146.058	249.883	236.748	139.769	199.938	148.679	158.776	251.086	240.795	135.135	247.205	216.719	138.804	234.712	138.546	145.611	244.468	241.919	130.657	243.798	210.765	152.384	248.253	243.401	140.317	251.717	240.23	135.988	136.066	199.069	33.969	131.572	194.848	32.692	114.962	162.727	16.943	36.46	9.382	1.019	14.209	36.044	0.509
4	cur4-6	248.493	244.12	144.466	248.76	243.492	140.705	250.429	241.693	139.142	194.051	138.316	144.989	250.8	242.1	134.364	241.72	208.141	136.485	232.533	134.975	146.358	243.002	239.286	121.146	232.795	195.357	138.613	246.691	243.584	139.411	251.357	238.997	130.378	136.643	200.057	32.713	131.205	193.801	29.615	114.631	158.903	13.033	37.018	9.912	0.748	13.481	35.249	0.545
4	cur4-7	248.277	243.6	141.641	248.752	243.418	137.683	250.002	238.603	124.55	194.89	139.339	145.254	250.791	241.907	134.913	246.527	215.813	136.283	232.375	135.54	145.766	242.833	239.135	120.598	241.056	212.154	165.989	248.042	244.823	148.975	251.544	239.5	128.104	134.642	198.068	38.681	129.283	190.874	37.597	113.923	159.751	16.929	36.544	8.966	0.622	25.716	55.114	0.665
4	cur4-8	248.237	243.619	141.991	248.264	243.216	136.877	250.59	240.734	128.596	194.149	138.661	147.177	251.135	242.696	135.301	247.749	217.759	136.917	237.898	140.514	149.2	242.495	238.062	119.194	237.46	199.836	141.768	245.139	240.157	125.455	252.339	241.744	130.737	138.94	202.33	37.154	139.2	200.819	37.116	130.442	181.08	22.174	38.185	7.738	0.639	26.518	56.35	0.58
4	cur4-9	248.5	243.679	141.056	247.934	242.352	131.523	251.255	236.324	151.486	196.212	144.416	154.413	250.091	241.155	127.752	245.548	212.381	122.433	235.087	140.655	133.362	242.905	238.841	120.513	233.955	194.361	135.643	247.03	242.014	130.916	250.985	238.728	140.596	139.573	203.036	40.939	134.857	197.993	36.6	127.771	178.252	22.434	38.072	7.937	0.832	25.941	55.838	0.662
5	cur5-1	250.67	242.963	138.293	249.625	242.865	135.068	248.848	225.867	106.594	187.258	126.702	136.749	251.499	241.681	128.159	245.451	218.052	133.003	233.695	135.923	123.836	243.892	236.728	114.147	239.861	201.828	145.5	246.78	236.11	111.745	250.552	218.861	120.982	157.847	201.858	16.653	132.807	185.075	18.415	124.156	160.599	8.953	27.293	3.462	0.449	37.106	62.808	0.855
5	cur5-2	250.494	243.405	139.521	250.023	242.353	130.215	250.138	236.971	141.177	190.835	131.956	144.9	249.826	231.752	113.33	244.16	211.819	122.049	233.682	142.357	129.125	243.533	235.07	108.729	229.963	185.78	127.269	249.306	241.943	128.209	249.995	214.927	118.411	137.414	191.98	21.197	147.979	192.45	11.704	112.563	151.991	7.723	21.777	4.018	0.48	30.217	57.408	0.738
5	cur5-3	250.781	243.171	139.541	249.364	243.614	143.052	248.812	226.28	112.275	187.32	127.892	138.403	250.821	240.973	127.758	243.608	210.838	122.479	235.028	142.058	124.645	243.821	237.584	115.93	230.926	176.334	99.116	249.255	242.046	129.244	250.194	218.453	120.976	157.767	199.465	15.333	131.618	184.295	17.717	123.649	158.997	7.303	25.827	3.925	0.412	38.528	63.996	0.622
5	cur5-4	249.636	244.29	147.385	249.43	239.076	122.439	248.582	226.659	113.804	180.966	120.63	127.585	250.864	240.349	126.025	239.128	193.601	112.309	226.902	127.889	123.903	243.344	235.959	111.732	224.043	173.074	108.529	248.086	237.709	116.531	248.995	211.752	113.946	139.005	192.55	20.285	138.781	189.278	16.417	115.497	150.566	7.556	26.858	3.593	0.57	38.391	64.937	0.779
5	cur5-5	249.073	243.701	148.092	248.72	237.266	120.328	249.187	227.623	107.778	178.485	117.622	123.384	250.393	240.882	129.766	235.648	189.435	107.049	225.192	118.035	115.307	243.294	235.915	111.717	247.452	230.866	144.12	247.623	235.418	111.215	248.418	212.454	113.434	138.661	189.653	24.697	134.657	181.463	20.637	112.035	149.567	9.792	22.894	3.498	0.538	38.207	64.965	0.808
5	cur5-6	249.311	241.085	125.328	248.427	238.803	119.685	248.169	225.127	106.039	181.175	119.869	127.561	249.52	232.873	111.389	238.899	194.819	116.417	229.513	121.631	113.81	241.773	232.307	101.347	231.319	176.498	106.322	245.106	233.723	105.503	249.98	214.211	116.908	150.577	202.31	24.556	149.671	200.419	25.835	130.389	167.939	9.688	27.733	3.264	0.466	33.829	63.686	0.807
5	cur5-7	249.67	242.265	130.625	249.707	239.607	123.424	248.926	227.728	108.902	178.51	115.666	121.389	249.814	233.467	115.935	231.084	184.785	111.761	224.731	111.654	111.746	241.809	230.74	96.714	222.753	174.316	109.898	245.41	232.38	101.278	249.795	217.351	111.597	139.173	192.421	22.189	132.824	183.749	21.544	116.601	154.366	7.189	22.988	3.773	0.385	23.415	46.833	0.707
5	cur5-8	249.687	241.703	128.11	249.348	235.732	117.177	249.177	224.523	104.279	178.738	114.929	118.535	249.582	231.279	113.248	229.555	179.446	103.687	221.799	112.671	118.58	241.709	230.353	96.171	216.223	166.911	102.936	245.319	231.842	100.424	248.313	211.852	107.162	145.834	199.677	25.914	145.768	196.618	23.267	129.805	169.592	11.047	28.456	3.223	0.529	28.129	52.753	0.778
5	cur5-9	249.542	241.827	128.763	249.396	237.345	120.841	247.586	226.654	113.594	179.763	116.886	120.989	249.666	233.288	117.221	229.924	181.909	105.335	222.231	112.163	112.311	241.819	230.875	97.429	220.385	172.827	107.932	245.78	234.005	106.361	249.69	215.963	110.243	148.953	201.197	26.857	145.346	195.581	20.921	129.991	166.749	8.721	27.634	2.887	0.375	28.634	55.192	0.777
6	cur6-1	249.632	242.135	139.708	248.506	239.709	133.211	248.206	234.311	146.738	186.178	128.902	136.469	251.456	242.025	130.391	231.729	199.59	114.286	227.707	140.055	126.942	244.202	239.108	121.32	223.345	179.014	114.998	248.655	242.921	137.94	248.605	209.735	113.104	160.76	202.355	18.103	143.687	186.742	11.289	112.312	147.805	7.89	28.807	3.549	0.566	40.853	66.096	0.847
6	cur6-2	250.637	243.417	142.693	249.377	241.651	129.814	250.356	237.884	145.555	187.694	128.777	138.228	251.707	243.464	143.859	242.739	209.426	122.064	232.785	151.026	142.676	244.018	237.882	117.326	229.388	184.199	120.21	249.412	243.555	145.856	248.834	212.083	114.499	157.265	199.865	13.471	148.651	194.515	13.325	111.422	147.799	5.831	23.295	3.936	0.476	32.467	57.809	0.777
6	cur6-3	248.884	240.047	130.368	249.816	242.363	133.454	247.693	229.393	127.328	188.729	130.602	141.285	249.244	235.989	124.13	238.458	206.44	119.925	221	131.085	123.174	245.265	241.927	129.077	238.046	192.651	122.674	248.563	242.408	145.608	250.799	216.591	119.089	145.925	198.85	25.744	143.555	186.665	12.565	111.242	131.353	3.719	26.034	3.606	0.447	28.655	55.81	0.696
6	cur6-4	249.54	243.912	147.004	249.187	243.108	135.278	250.425	239.039	131.628	188.293	129.253	137.972	250.519	242.061	138.076	239.511	197.45	119.965	232.163	142.617	145.285	243.911	238.984	120.617	230.772	190.827	135.67	247.758	243.369	138.763	249.475	215.316	120.777	159.971	206.756	25.292	141.064	195.063	25.694	127.221	176.27	19.222	35.529	5.647	0.748	43.338	73.302	0.931
6	cur6-5	249.513	242.926	135.581	248.523	240.527	125.443	248.485	228.032	115.088	183.127	124.906	134.453	250.5	238.93	123.599	237.849	194.027	118.676	227.23	126.226	125.202	243.015	236.718	113.09	226.697	185.379	129.192	246.522	239.716	121.753	248.133	213.791	118.917	148.101	202.459	30.614	145.106	200.039	31.419	123.531	166.473	13.836	34.389	4.809	0.793	31.254	60.793	0.765
6	cur6-6	249.814	243.192	137.831	248.468	241.288	127.239	248.492	229.379	112.311	185.824	126.312	135.155	250.621	241.867	135.446	239.429	195.039	121.712	226.584	121.376	127.832	243.789	238.804	120.171	227.536	183.654	125.353	246.223	238.008	117.701	249.372	215.422	118.833	147.073	202.711	33.36	145.018	201.181	33.177	128.98	175.194	17.695	37.568	5.77	1.018	32.808	63.019	0.715
6	cur6-7	249.567	242.815	134.485	248.95	238.532	123.654	248.745	229.445	111.652	180.988	119.056	124.223	249.419	233.03	116.542	228.771	183.739	110.079	226.634	119.515	124.142	243.246	235.038	108.744	226.451	180.084	117.815	245.573	234.838	108.133	249.465	214.974	110.044	140.48	193.149	25.112	132.873	183.383	23.792	121.094	161.495	12.322	25.254	3.128	0.402	21.973	45.407	0.677
6	cur6-8	249.794	241.02	126.049	249.47	238.408	121.276	249.101	227.525	109.221	179.485	118.484	123.726	249.653	233.831	117.258	230.9	185.062	109.033	225.07	122.005	131.649	243.19	235.777	111.172	223.991	178.397	115.083	246.406	237.088	115.259	248.985	214.088	109.543	141.097	192.483	23.305	140.215	191.499	23.825	127.506	166.636	11.999	31.422	3.132	0.638	24.587	48.452	0.744
6	cur6-9	249.622	242.622	135.561	249.127	239.351	123.754	248.675	226.707	107.561	179.424	118.136	124.425	250.104	235.675	119.483	233.428	188.523	112.248	221.903	112.441	119.715	243.037	235.597	110.749	223.95	179.705	118.722	245.14	234.401	106.941	248.991	216.255	111.713	154.158	206.895	32.138	150.488	201.692	28.124	135.818	178.299	14.591	26.315	3.329	0.439	25.861	51.254	0.7
7	cur7-1	251.779	245.013	163.047	251.949	243.232	152.489	251.054	240.076	155.405	218.693	174.737	182.087	250.708	234.445	139.236	249.446	222.675	149.608	240.578	158.736	146.611	248.494	243.833	141.81	247.807	217.308	163.197	251.614	243.231	150.292	252.178	240.227	151.735	134.346	181.811	39.15	155.262	163.947	23.26	115.72	148.05	21.631	47.508	18.088	0.753	17.728	30.585	0.593
7	cur7-2	251.02	244.269	160.823	251.385	242.05	151.267	250.689	238.373	153.31	217.988	173.492	179.891	249.72	226.668	127.225	246.946	209.961	129.706	240.71	157.622	147.51	248.641	243.531	139.983	246.913	216.594	165.828	251.63	242.555	147.352	251.212	236.68	151.379	131.04	178.607	37.875	153.951	166.142	27.389	117.941	148.347	20.947	51.626	18.999	0.806	19.524	30.229	0.502
7	cur7-3	252.227	247.35	180.425	252.083	245.468	167.957	251.976	243.058	167.58	223.462	178.678	186.994	252.196	241.36	161.636	248.623	221.914	149.374	242.056	158.137	144.467	251.181	245.211	158.773	248.722	218.842	158.582	251.957	244.576	161.356	250.107	229.158	138.521	115.384	159.264	33.853	145.921	153.846	24.22	112.17	137.228	17.417	47.511	18.255	0.647	22.546	31.794	0.556
7	cur7-4	251.795	245.751	171.531	251.368	243.548	168.79	249.427	235.714	150.636	205.351	157.817	168.36	251.399	241.338	161.981	241.255	198.335	131.566	237.819	147.827	146.129	250.309	245.148	156.659	244.794	213.555	162.563	250.573	241.061	149.856	249.118	231.233	143.842	150.807	193.224	42.216	162.134	166.691	23.738	113.673	149.522	25.433	56.596	18.311	0.929	35.645	44.907	0.677
7	cur7-5	251.725	246.599	173.76	250.931	244.368	180.305	249.617	237.845	158.007	206.198	158.245	167.121	252.38	243.037	160.554	234.306	203.263	153.892	236.377	160.288	167.049	250.148	245.215	155.381	245.165	214.882	161.279	249.385	237.537	144.63	248.653	221.498	129.248	150.233	192.358	41.534	159.94	165.075	25.128	116.137	145.173	21.001	49.484	15.75	0.725	35.593	45.386	0.679
7	cur7-6	251.697	244.812	170.128	251.937	246.185	180.974	250.267	235.605	149.462	210.18	161.217	170.478	252.175	243.217	162.791	242.492	205.165	151.007	240.414	145.089	147.586	250.314	245.284	154.538	247.714	219.789	169.426	251.854	243.372	148.965	251.134	235.131	145.148	145.761	182.9	35.204	162.857	165.907	21.966	116.906	150.431	21.63	46.882	13.688	0.718	33.617	42.312	0.685
7	cur7-7	251.269	247.035	167.914	251.893	243.429	156.774	251.693	241.142	157.818	209.995	158.873	169.634	251.48	235.743	140.03	242.056	190.707	136.044	240.354	144.452	151.359	248.729	243.041	136.947	247.717	219.102	162.382	251.326	244.061	149.383	252.517	240.072	150.299	128.324	175.263	35.974	147.556	159.997	24.014	109.599	144.633	22.889	50.326	15.288	0.669	15.368	27.019	0.555
7	cur7-8	251.438	245.17	163.77	251.641	240.364	151.757	249.366	233.722	146.225	207.508	157.491	166.998	250.064	230.823	135.872	235.451	182.423	129.214	236.555	145.192	152.255	248.588	243.524	141.55	245.211	214.314	157.902	250.917	241.151	146.545	251.06	236.57	148.01	129.906	179.845	41	146.057	158.219	23.904	113.787	140.138	17.995	51.137	15.556	0.662	13.761	27.375	0.591
7	cur7-9	251.493	245.286	164.162	251.225	240.107	152.368	248.63	234.091	152.158	211.08	161.129	170.159	250.617	232.459	137.73	239.003	188.216	134.058	233.479	132.443	141.683	248.877	243.244	139.045	245.528	211.27	154.283	250.849	241.247	144.272	249.108	231.306	143.479	124.667	173.534	39.221	146.811	159.313	26	107.595	144.877	25.672	52.605	15.729	0.704	15.736	25.408	0.612
8	cur8-1	250.417	240.155	122.242	249.377	236.922	114.54	248.924	221.359	98.386	181.896	123.079	136.821	248.294	226.408	97.687	246.573	213.778	130.181	232.696	137.025	127.76	243.536	235.956	111.359	228.9	182.226	121.758	249.127	243.072	136.084	249.854	213.952	114.557	149.324	192.712	14.564	145.572	185.731	9.989	131.871	156.561	6.04	18.517	4.448	0.4	30.932	56.907	0.713
8	cur8-2	249.877	237.544	118.623	251.146	242.489	131.638	249.609	229.686	127.838	182.728	124.969	139.005	249.85	232.997	114.702	243.624	208.485	119.704	229.209	137.928	129.861	243.601	235.215	109.171	224.28	177.314	116.924	248.773	241.446	126.477	249.433	211.059	114.456	145.361	187.732	12.701	134.649	169.085	6.394	118.698	136.718	3.158	21.15	3.805	0.37	29.383	51.327	0.628
8	cur8-3	250.469	239.482	121.592	250.411	242.605	134.043	247.99	217.41	92.828	177.399	118.102	128.232	251.078	239.362	128.847	241.858	204.955	117.508	228.658	119.276	115.69	242.683	233.905	105.785	226.012	183.302	126.901	245.559	233.1	103.368	249.323	211.607	115.388	145.223	187.578	11.818	133.579	172.122	7.32	129.446	154.744	6.08	21.33	3.766	0.414	30.643	50.813	0.537
8	cur8-4	249.288	240.294	129.138	249.846	242.397	143.07	249.378	230.257	119.397	172.722	113.909	124.111	250.931	239.934	124.462	228.842	184.412	109.246	228.967	129.636	134.77	242.746	234.508	107.771	226.605	185.178	127.951	245.71	232.54	103.606	247.515	208.917	110.651	159.482	190.877	8.146	133.786	174.818	8.446	122.091	146.353	4.192	21.183	3.987	0.349	40.864	62.407	0.494
8	cur8-5	248.9	236.475	118.435	248.364	233.689	110.993	247.169	216.074	91.269	171.636	112.884	122.358	246.944	221.394	92.396	233.005	184.883	110.831	221.671	111.503	114.97	241.355	231.728	99.317	217.328	168.312	104.984	245.494	230.401	98.643	247.462	207.235	109.389	157.98	202.725	20.184	153.247	197.487	20.474	138.945	167.123	8.658	23.783	3.58	0.391	33.309	58.036	0.708
8	cur8-6	249.492	237.91	118.391	249.052	234.374	111.663	248.204	218.624	95.144	174.397	114.247	124.223	247.882	225.431	98.316	233.259	179.275	100.011	227.401	115.91	111.808	241.303	230.107	94.483	220.573	169.89	105.57	245.619	229.89	95.181	249.573	213.396	112.018	153.132	197.636	16.728	156.275	199.549	18.455	142.428	167.727	7.813	22.463	3.678	0.37	31.679	57.014	0.727
8	cur8-7	249.154	239.512	122.252	248.523	234.576	111.796	248.188	218.249	96.807	173.471	112.988	120.323	248.508	229.255	105.21	231.658	180.638	105.009	223.091	106.725	112.961	241.72	232.871	102.536	224.617	175.163	105.758	245.206	230.377	96.509	248.341	215.452	114.599	149.431	195.455	20.693	144.33	189.983	19.275	132.339	158.047	8.424	28.766	2.981	0.459	23.223	44.962	0.714
8	cur8-8	248.877	238.951	121.248	248.248	233.244	108.939	247.491	220.655	97.123	174.587	114.2	123.034	248.729	229.116	105.631	230.597	178.288	103.735	222.012	106.648	116.69	241.783	233.171	103.611	225.762	176.668	107.037	244.045	229.496	95.374	249.599	221.276	118.414	156.21	203.067	22.525	156.504	202.205	23.314	139.911	174.04	11.84	23.227	3.489	0.449	29.125	52.793	0.667
8	cur8-9	249.286	239.636	122.077	248.364	235.896	114.888	248.949	224.451	102.051	172.957	111.713	119.575	248.212	227.538	101.716	231.11	178.827	104.932	226.43	113.251	117.814	241.456	232.047	100.557	226.306	177.166	107.496	245.271	230.972	98.137	249.77	219.37	115.81	154.739	200.633	21.605	151.825	198.689	23.314	136.067	163.798	6.895	22.862	3.687	0.461	30.688	55.429	0.763
9	cur9-1	250.959	248.4	190.149	251.875	248.404	198.18	251.301	245.407	184.208	238.961	208.049	218.446	251.217	240.413	161.455	251.563	242.851	185.827	246.132	201.172	207.328	250.381	249.271	195.58	252.003	239.93	208.729	252.326	248.032	194.545	252.358	245.397	184.817	82.813	153.063	38.281	73.85	137.297	30.218	71.392	130.294	26.171	33.901	24.36	10.893	4.671	21.282	1.607
9	cur9-2	252.126	249.988	201.532	252.165	247.917	192.162	252.33	248.167	201.586	243.227	215.51	224.513	252.722	246.361	179.377	250.173	240.486	182.903	247.355	191.196	185.127	250.345	249.846	190.022	249.919	236.249	204.406	251.638	247.331	183.567	252.222	244.196	176.279	89.697	158.066	38.551	88.803	148.366	29.737	79.33	137.411	26.78	34.226	25.449	12.649	9.588	30.292	0.774
9	cur9-3	250.87	249.105	188.102	252.054	247.066	180.154	251.442	246.632	186.393	243.071	212.613	222.608	252.267	242.884	162.678	252.416	243.32	178.303	246.261	189.58	191.01	249.332	249.324	180.471	251.988	238.734	205.678	251.862	249.171	196.245	252.744	247.988	197.405	78.242	148.145	34.898	71.317	133.224	28.053	70.187	130.489	28.431	33.298	24.171	10.525	3.92	20.326	1.445
9	cur9-4	251.871	248.24	199.039	252.429	247.971	197.294	252.563	247.737	193.085	236.187	203.473	214.804	252.161	245.638	184.815	249.193	233.929	188.928	244.437	184.277	197.324	249.311	248.752	186.539	250.728	236.961	199.946	252.019	248.626	197.402	252.182	243.634	178.055	96.244	166.167	43.183	83.327	146.669	33.24	67.603	130.448	30.11	34.044	23.594	10.211	12.66	37.238	0.987
9	cur9-5	251.125	247.5	186.235	252.079	246.272	181.949	251.058	245.58	184.508	233.01	199.449	211.212	251.272	242.167	168.574	249.723	237.313	198.796	244.21	183.516	191.207	249.685	248.305	187.044	250.433	236.935	203.176	251.986	247.022	189.076	251.533	242.685	173.987	80.431	153.092	38.414	81.171	145.296	32.264	71.253	133.168	29.862	35.245	23.995	10.512	5.022	26.002	1.153
9	cur9-6	250.865	249.057	189.663	252.093	246.898	184.033	251.951	246.999	187.631	236.376	201.408	213.19	252.03	243.394	165.293	251.398	242.498	204.55	246.546	186.704	195.596	249.014	248.865	174.563	252.401	246.337	190.712	251.88	248.66	186.625	252.62	246.305	182.999	82.77	157.159	40.463	73.586	129.748	29.741	74.369	137.436	31.264	35.672	24.319	11.302	5.235	22.835	1.773
9	cur9-7	251.607	247.936	185.521	252.078	245.926	180.07	252.066	245.258	182.61	236.412	203.018	215.609	251.924	242.441	166.72	247.947	228.776	176.062	242.672	170.031	187.92	249.042	248.678	176.846	252.089	239.716	199.91	252.058	247.378	182.207	253.003	246.347	185.833	86.951	158.388	38.5	83.152	149.274	34.386	73.535	135.019	29.818	37.982	25.05	8.598	5.369	25.467	1.094
9	cur9-8	250.719	247.722	185.636	251.938	245.012	176.59	251.646	244.864	183.178	230.102	193.487	206.17	251.157	239.647	159.892	248.41	229.402	178.045	241.45	163.781	180.277	248.9	247.685	171.94	249.992	234.736	197.707	251.72	246.324	179.423	250.856	240.075	167.489	77.463	150.278	39.5	70.537	132.225	27.585	64.804	125.248	28.254	36.027	23.304	9.268	4.878	22.399	1.413
9	cur9-9	251.17	247.066	182.354	252.211	244.788	173.894	251.41	244.74	184.478	231.999	196.573	209.624	250.288	236.771	153.424	248.355	226.815	173.238	242.511	177.129	192.767	248.901	247.496	169.047	250.118	236.283	196.316	251.733	246.8	185.246	252.234	244.002	176.888	81.97	153.913	38.055	79.347	145.511	32.279	73.906	135.289	28.774	39.063	25.432	9.879	4.936	22.47	1.318
10	cur10-1	246.939	249.814	215.064	248.413	250.464	211.62	248.245	248.59	211.374	246.511	226.349	233.917	246.327	247.121	220.784	251.567	248.439	206.846	246.888	210.635	223.308	249.527	250.504	205.867	249.646	244.73	224.577	249.112	250.471	210.814	248.89	249.927	211.591	48.288	142.833	54.926	52.66	142.864	54.037	47.727	135.093	50.596	37.185	30.777	15.533	0.294	4.627	4.417
10	cur10-2	246.592	251.091	216.531	248.664	251.001	212.865	248.468	248.196	212.856	247.321	226.867	235.515	250.388	249.282	193.544	251.803	248.436	203.87	247.285	213.156	221.292	247.531	250.842	213.351	247.544	244.895	228.347	248.898	250.381	206.936	247.36	248.854	212.708	56.258	153.91	59.355	57.092	149.609	57.409	44.963	127.407	47.728	40.458	32.456	15.845	0.981	18.367	0.841
10	cur10-3	242.315	249.345	222.659	246.397	249.741	215.138	246.364	250.176	216.835	248.104	230.183	236.599	251.909	251.008	203.67	244.643	243.321	216.459	250.185	231.252	240.796	243.435	250.976	220.695	248.984	244.381	223.184	243.744	250.766	219.873	248.73	250.393	212.499	68	165.344	62.592	64.909	154.795	57.501	52.836	138.978	50.426	38.081	30.934	13.839	4.515	31.867	2.788
10	cur10-4	245.155	250.228	218.389	246.066	249.437	216.115	245.071	248.237	217.209	248.137	231.266	238.171	251.538	250.485	199.322	248.395	244.261	205.342	248.144	218.828	229.028	249.591	250.674	211.221	249.544	244.186	221.212	243.392	249.046	221.238	250.057	250.414	209.704	71.688	165.758	63.746	64.335	150.82	56.824	50.988	136.032	50.22	43.661	32.667	14.007	3.269	26.063	2.933
10	cur10-5	244.601	250.188	218.785	246.406	249.976	216.274	245.527	249.727	218.691	247.22	229.832	236.1	251.168	249.364	200.38	249.608	246.236	208.533	250.013	232.139	240.012	247.464	250.232	213.583	249.517	244.995	220.959	241.919	247.533	221.774	249.355	249.814	211.261	70.991	166.972	62.814	68.171	160.709	61.089	59.126	148.816	56.228	47.134	35.062	14.932	5.774	34.272	2.876
10	cur10-6	242.334	247.299	225.268	245.341	251.178	217.77	246.68	249.314	215.719	248.176	233.171	238.191	251.3	249.629	207.885	251.502	249.691	211.759	246.353	219.601	228.512	246.214	250.284	216.008	248.25	245.562	225.229	246.252	250.961	215.917	244.571	249.795	220.011	66.399	162.916	62.249	66.889	156.821	58.733	54.576	137.353	48.658	41.343	32.338	14.843	3.105	26.124	3.536
10	cur10-7	244.308	249.896	219.602	246.684	250.654	216.315	243.422	248.458	223.215	248.106	231.16	237.702	251.284	249.663	198.94	251.888	248.194	210.225	249.085	221.049	234.053	246.46	250.842	216.279	248.297	245.703	224.468	243.246	249.808	221.168	248.104	250.817	214.729	68.521	164.931	62.694	68.206	158.411	59.386	52.44	138.178	51.558	44.679	33.509	13.929	3.621	28.489	2.426
10	cur10-8	243.246	249.559	221.537	244.978	250.061	218.424	244.779	249.648	219.247	246.105	226.864	233.701	251.557	250.425	202.75	247.227	245.71	217.955	249.795	230.534	239.223	245.112	251.068	217.774	248.114	245.264	225.894	242.161	249.036	223.968	248.24	250.144	213.858	71.17	168.132	64.762	68.108	160.833	62.671	54.333	140.663	51.19	36.675	29.51	13.31	5.283	33.055	2.71
10	cur10-9	245.401	249.968	217.181	247.014	250.237	214.529	247.806	249.31	213.003	244.404	216.697	227.808	251.511	245.261	186.401	249.764	236.496	208.934	246.666	212.788	224.635	247.918	250.079	209.573	249.438	244.731	220.141	246.46	249.828	215.156	245.102	249.17	218.735	63.269	161.915	64.843	64.854	156.533	61.221	55.636	146.227	55.908	41.881	32.98	17.062	1.439	17.287	0.7
11	cur11-1	248.551	239.968	122.686	247.959	232.701	104.411	250.073	235.389	121.049	172.1	118.971	139.532	248.485	229.194	101.762	227.271	166.089	81.238	226.36	99.255	97.791	243.855	232.441	101.932	238.276	196.55	116.875	244.387	234.054	106.134	250.36	215.884	109.813	158.542	198.057	16.582	157.179	198.101	16.602	141.736	178.78	14.611	17.827	4.148	0.55	28.098	47.617	0.622
11	cur11-2	248.586	239.492	121.765	249.777	242.695	138.607	249.793	236.833	136.317	165.844	112.062	133.342	248.018	224.674	96.402	228.959	178.42	102.946	224.572	111.829	115.979	242.383	231.663	99.274	245.406	206.202	92.174	245.196	235.433	110.156	249.912	216.276	105.819	161.413	193.16	7.548	157.576	190.989	7.915	163.458	181.284	5.654	16.885	3.754	0.521	40.193	65.121	0.648
11	cur11-3	249.405	243.519	142.847	248.919	238.169	119.162	249.318	225.261	111.586	177.924	124.674	141.886	248.223	222.512	94.624	204.82	147.647	78.315	215.477	92.927	102.999	244.518	229.557	94.634	231.246	177.498	104.701	250.754	241.097	126.861	250.063	226.212	113.301	159.735	198.868	14.896	159.463	196.409	10.842	143.692	174.238	8.627	16.856	3.741	0.514	27.41	47.102	0.619
11	cur11-4	248.915	240.353	124.81	249.066	237.295	116.022	242.781	199.559	114.236	178.066	124.542	146.328	248.666	226.526	100.097	224.053	162.156	76.514	218.68	94.686	101.498	244.087	228.867	93.211	232.074	182.127	113.653	248.131	236.826	114.224	250.557	232.772	122.282	156.022	199.009	19.949	163.045	200.646	15.54	144.824	169.501	7.88	19.666	4.528	0.55	26.663	46.063	0.627
11	cur11-5	248.792	238.151	119.65	248.17	230.147	103.929	248.473	220.753	108.988	175.756	123.022	143.311	248.243	223.674	96.518	219.657	158.188	80.697	217.021	92.865	100.452	244.996	228.73	92.703	231.241	181.943	114.398	248.482	237.162	115.642	249.574	223.924	108.55	165.568	200.998	12.479	162.675	199.553	12.167	123.631	129.198	4.103	17.55	4.423	0.471	23.98	40.744	0.558
11	cur11-6	248.898	237.738	117.188	248.942	234.494	109.334	247.935	223.598	106.223	174.232	121.89	140.71	249.024	229.19	102.722	225.638	167.032	80.015	220.401	92.111	99.026	243.578	231.008	97.346	232.946	185.313	111.091	244.292	231.349	98.371	250.179	227.313	111.912	164.047	198.445	10.943	159.972	193.797	8.491	145.674	169.944	6.693	17.572	4.469	0.541	23.264	41.24	0.584
11	cur11-7	248.794	236.563	116.694	248.525	234.514	108.265	249.702	233.588	126.253	173.144	119.995	138.59	248.72	228.542	101.201	226.487	172.48	84.869	222.146	103.972	118.984	244.571	230.968	97.852	224.863	177.091	107.714	245.368	236.086	112.783	249.6	221.972	104.456	163.867	199.068	14.017	161.736	198.611	11.802	148.762	174.108	8.115	20.674	3.837	0.456	34.594	56.733	0.605
11	cur11-8	248.8	237.839	117.481	248.804	231.811	104.412	249.553	227.515	111.03	170.059	117.209	137.02	249.034	229.238	103.058	229.552	175.917	83.806	217.947	94.774	105.001	244.212	231.062	97.663	232.878	185.514	114.503	244.106	233.724	105.258	250.19	230.009	110.927	163.193	198.517	13.068	159.749	199.052	12.433	144.611	165.531	4.251	17.964	3.857	0.478	35.6	58.295	0.686
11	cur11-9	249.67	238.016	118.159	249.252	233.599	106.756	251.64	237.628	146.674	172.902	119.466	140.729	249.37	232.649	108.195	238.267	195.504	108.315	228.723	126.002	123.634	243.442	233.781	104.263	237.213	204.707	153.905	248.248	242.284	128.803	251.282	239.277	129.811	158.854	195.463	12.448	160.133	198.064	12.375	143.557	166.805	5.665	20.635	3.998	0.44	31.106	53.431	0.629
[truncated: 87 more columns]

## Sheet: Possible combinations
Combination	1	2	3	4	5	6	7	8	9	10	11	12	13	14	15	16	17	18	19	20	21	22	23	24	25	26	27	28	29	30	31	32	33	34	35	36	37	38	39	40	41	42	43	44	45	46	47	48	49
Sensor	1	2	3	4	5	6	7	8	9	10	11	1	1	2	1	2	3	1	2	3	4	1	2	3	4	5	1	2	3	4	5	6	1	2	3	4	5	6	7	1	2	3	4	5	6	7	8	1	2
	0	0	0	0	0	0	0	0	0	0	0	2	3	3	4	4	4	5	5	5	5	6	6	6	6	6	7	7	7	7	7	7	8	8	8	8	8	8	8	9	9	9	9	9	9	9	9	10	10
	0	0	0	0	0	0	0	0	0	0	0	0	0	0	0	0	0	0	0	0	0	0	0	0	0	0	0	0	0	0	0	0	0	0	0	0	0	0	0	0	0	0	0	0	0	0	0	0	0
	0	0	0	0	0	0	0	0	0	0	0	0	0	0	0	0	0	0	0	0	0	0	0	0	0	0	0	0	0	0	0	0	0	0	0	0	0	0	0	0	0	0	0	0	0	0	0	0	0
	0	0	0	0	0	0	0	0	0	0	0	0	0	0	0	0	0	0	0	0	0	0	0	0	0	0	0	0	0	0	0	0	0	0	0	0	0	0	0	0	0	0	0	0	0	0	0	0	0
	0	0	0	0	0	0	0	0	0	0	0	0	0	0	0	0	0	0	0	0	0	0	0	0	0	0	0	0	0	0	0	0	0	0	0	0	0	0	0	0	0	0	0	0	0	0	0	0	0
	0	0	0	0	0	0	0	0	0	0	0	0	0	0	0	0	0	0	0	0	0	0	0	0	0	0	0	0	0	0	0	0	0	0	0	0	0	0	0	0	0	0	0	0	0	0	0	0	0
	0	0	0	0	0	0	0	0	0	0	0	0	0	0	0	0	0	0	0	0	0	0	0	0	0	0	0	0	0	0	0	0	0	0	0	0	0	0	0	0	0	0	0	0	0	0	0	0	0
	0	0	0	0	0	0	0	0	0	0	0	0	0	0	0	0	0	0	0	0	0	0	0	0	0	0	0	0	0	0	0	0	0	0	0	0	0	0	0	0	0	0	0	0	0	0	0	0	0
	0	0	0	0	0	0	0	0	0	0	0	0	0	0	0	0	0	0	0	0	0	0	0	0	0	0	0	0	0	0	0	0	0	0	0	0	0	0	0	0	0	0	0	0	0	0	0	0	0
	0	0	0	0	0	0	0	0	0	0	0	0	0	0	0	0	0	0	0	0	0	0	0	0	0	0	0	0	0	0	0	0	0	0	0	0	0	0	0	0	0	0	0	0	0	0	0	0	0
[truncated: 1,998 more columns]

## Sheet: 1 combination
code	1	2	3	4	5	6	7	8	9	10	11
1	1	2	1	2	1	2	3	6	1	1	1
1	1	5	2	2	1	1	1	1	2	2	1
1	1	5	2	8	1	1	1	1	6	2	1
1	1	1	1	6	5	2	1	4	4	1	1
1	1	1	5	8	5	2	1	1	1	1	1
1	1	1	1	1	1	2	1	1	1	1	1
1	1	1	1	2	1	3	2	1	1	1	1
1	1	1	11	2	11	2	2	1	1	1	1
1	1	1	1	1	2	1	8	2	1	1	1
2	2	2	11	2	1	8	1	2	3	2	2
2	2	2	1	1	1	2	3	2	11	1	2
2	2	5	2	1	1	1	1	2	11	8	2
2	6	2	1	1	5	8	1	1	2	8	8
2	2	2	2	5	5	2	8	1	2	8	5
2	2	2	2	2	11	1	2	8	2	2	1
2	2	2	2	2	11	3	11	2	2	1	2
2	2	1	2	2	11	3	11	2	2	1	2
2	2	2	2	2	11	6	11	2	2	2	8
3	3	3	3	5	3	3	11	3	3	3	3
3	3	3	3	6	3	3	11	3	3	3	3
3	3	3	3	6	3	11	3	3	3	3	3
3	3	3	3	3	3	2	3	3	3	3	3
3	3	3	3	3	11	2	3	3	3	3	3
3	3	3	3	6	3	2	3	3	3	3	3
3	3	3	8	4	3	3	3	3	3	3	3
3	3	3	3	3	11	3	3	3	3	3	3
3	3	11	3	4	11	3	3	3	2	3	2
4	4	4	6	3	6	4	4	1	4	6	5
4	1	4	6	3	6	4	4	4	4	4	6
4	4	4	6	11	4	4	7	4	4	4	8
4	4	4	4	11	4	7	4	4	4	6	4
4	4	4	4	11	4	4	4	4	7	4	4
4	4	4	4	4	4	7	4	4	4	4	4
4	4	4	4	4	4	7	6	4	4	4	4
4	4	4	4	11	4	4	6	4	4	4	4
4	4	4	7	11	4	4	4	4	4	4	4
5	5	5	5	6	6	4	4	6	6	5	5
5	1	8	6	4	1	6	4	6	8	6	5
5	5	5	5	6	6	4	4	5	3	6	5
5	5	5	5	6	5	8	6	8	11	5	5
5	4	6	5	1	6	8	5	8	6	5	6
5	6	6	5	6	1	6	5	2	3	5	5
5	5	5	5	1	5	6	1	8	2	2	5
5	6	5	5	5	1	2	8	8	2	8	5
5	6	6	5	5	5	8	1	8	2	5	5
6	5	8	6	6	5	6	6	6	8	6	5
6	5	8	1	3	7	6	4	5	8	6	5
6	5	8	11	6	6	6	6	4	8	6	5
6	6	6	4	3	7	5	6	6	6	4	4
6	6	6	6	6	6	5	6	6	1	6	6
6	4	4	6	3	6	6	5	6	6	4	6
6	5	5	5	5	5	6	8	6	6	8	6
6	5	5	6	5	5	8	8	6	1	5	6
6	6	6	5	5	6	6	8	6	1	8	6
7	7	7	7	7	6	7	7	7	7	7	7
7	7	7	7	7	5	4	7	7	7	7	7
7	7	7	7	7	7	7	7	7	7	7	7
7	7	7	7	7	7	4	7	7	7	7	7
7	7	7	7	7	7	7	7	7	7	7	7
7	7	7	7	7	7	7	7	7	7	7	7
7	7	7	7	7	6	7	4	7	7	7	7
7	7	7	7	7	4	7	7	7	7	7	7
7	7	7	7	7	7	6	4	7	7	7	7
8	8	11	8	4	11	4	6	6	8	6	11
8	8	8	11	4	1	5	6	6	5	2	11
8	8	8	8	8	5	4	5	5	6	8	8
8	11	5	2	8	5	6	6	5	5	8	8
8	8	8	8	8	11	8	8	2	11	8	8
8	8	11	8	8	2	1	1	2	2	5	8
8	8	8	8	5	1	2	1	2	2	8	8
8	8	8	8	5	2	2	1	8	2	8	8
8	8	8	8	1	2	2	8	8	2	8	8
9	9	9	9	9	9	9	9	9	9	9	9
9	9	9	9	10	9	9	9	9	9	9	9
9	9	9	9	9	9	9	9	9	9	9	9
9	9	9	9	9	9	9	9	9	9	9	9
9	9	9	9	9	9	9	9	9	9	9	9
9	9	9	9	9	9	9	9	9	9	9	9
9	9	9	9	9	9	9	9	9	9	9	9
9	9	9	9	9	9	9	9	9	9	9	9
9	9	9	9	9	9	9	9	9	9	9	9
10	10	10	10	10	10	10	10	10	10	10	10
10	10	10	10	10	10	10	10	10	10	10	10
10	10	10	10	10	10	10	10	10	10	10	10
10	10	10	10	10	10	10	10	10	10	10	10
10	10	10	10	9	10	10	10	10	10	10	10
10	10	10	10	10	10	10	9	10	10	10	10
10	10	10	10	9	10	10	10	10	10	10	10
10	10	10	10	10	10	10	10	10	10	10	10
10	10	10	10	10	10	10	10	10	10	10	10
11	8	11	6	11	11	11	1	11	2	8	11
11	11	8	11	11	3	8	8	11	3	11	11
11	5	8	8	11	11	11	2	11	3	5	11
11	8	11	11	11	11	3	3	11	8	11	11
11	11	11	11	4	3	3	3	11	8	11	8
11	11	3	8	4	8	3	3	11	11	11	11
11	11	11	11	11	3	11	8	11	2	11	11
11	11	11	3	11	11	11	3	11	2	8	11
11	11	11	11	11	8	8	8	11	4	11	11

## Sheet: 2 combinations
code	12	13	14	15	16	17	18	19	20	21	22	23	24	25	26	27	28	29	30	31	32	33	34	35	36	37	38	39	40	41	42	43	44	45	46	47	48	49	50	51	52	53	54	55	56	57	58	59	60
1	1	1	1	2	2	1	1	2	5	2	1	2	8	2	2	2	2	11	3	11	3	5	8	5	2	2	8	2	1	1	1	1	1	1	2	1	1	1	1	1	2	1	2	2	1	1	1	1	1
1	1	2	2	2	2	2	1	1	2	2	1	2	8	2	8	1	1	8	8	5	8	1	1	2	2	1	1	1	1	1	2	1	1	1	6	1	2	2	2	2	2	2	1	1	1	1	1	1	1
1	5	5	5	1	5	2	1	5	1	2	1	5	8	2	8	1	5	8	8	5	8	1	1	1	2	2	2	1	6	6	1	1	1	1	6	2	2	1	2	2	2	2	2	2	5	1	1	2	2
1	1	1	1	6	5	5	5	5	5	6	1	1	1	8	6	1	1	1	5	1	8	1	1	1	1	1	1	1	6	1	1	6	1	1	1	4	1	1	1	1	6	1	1	1	1	1	1	1	1
1	1	1	1	6	1	6	5	5	6	1	1	1	5	2	6	1	1	5	8	1	1	1	1	4	1	4	1	1	1	1	4	1	1	1	1	4	1	1	1	1	1	1	1	1	1	1	1	1	1
1	1	1	1	1	1	5	2	1	1	6	2	1	1	2	2	2	1	1	8	1	1	1	1	1	1	6	6	1	1	1	1	6	1	2	1	6	1	1	1	1	1	1	1	1	1	1	1	1	1
1	1	1	1	1	2	1	1	2	1	6	1	1	1	3	5	1	2	1	8	1	2	1	2	1	2	7	2	2	1	1	1	1	1	1	1	2	1	1	1	1	1	1	1	2	1	1	1	1	1
1	2	8	2	1	2	8	2	11	8	2	1	1	2	2	2	2	2	2	2	1	2	1	1	2	1	1	1	1	1	1	1	1	1	1	1	1	1	1	2	1	2	1	1	1	1	1	1	2	1
1	2	1	1	1	2	5	1	2	1	6	1	2	1	1	8	5	1	5	5	8	8	1	2	1	1	1	6	1	1	1	1	1	1	1	1	1	1	1	1	1	1	1	1	1	1	1	1	1	1
2	2	8	8	2	2	8	2	2	2	2	2	2	8	2	1	2	1	8	1	8	8	2	2	2	2	2	2	1	8	5	8	3	8	8	8	8	2	2	2	2	1	2	2	2	3	2	2	2	2
2	2	1	1	2	2	1	8	8	5	2	2	2	1	2	2	2	2	1	3	11	2	2	2	1	2	2	2	2	11	5	5	2	8	2	11	2	2	2	1	2	2	2	2	2	2	2	2	2	2
2	2	2	2	2	1	2	2	1	2	1	2	1	8	1	8	2	1	1	1	8	1	2	1	2	1	1	1	1	8	2	8	8	5	8	8	2	2	2	8	2	2	2	2	1	8	2	2	2	2
2	5	5	2	1	1	1	5	1	1	11	5	1	1	1	5	1	1	1	1	5	1	1	1	1	2	1	1	1	5	2	2	11	5	5	5	2	5	2	2	8	2	8	8	2	8	8	2	2	3
2	2	2	2	2	5	8	1	1	1	6	1	2	2	8	1	1	8	11	1	2	1	2	1	2	1	1	1	1	2	2	2	6	6	6	2	1	2	2	8	5	1	8	8	1	8	2	5	5	5
2	2	2	2	2	2	2	8	2	2	5	2	2	2	1	2	2	2	2	2	2	2	8	5	8	6	6	6	2	11	2	2	6	2	2	11	6	2	2	2	2	2	2	2	2	2	1	1	1	1
2	2	2	2	2	2	2	8	11	8	2	2	1	2	3	3	2	2	2	3	11	3	2	2	2	2	8	8	2	2	1	1	1	1	1	1	1	2	2	1	1	2	1	2	2	1	2	2	2	2
2	2	2	2	2	2	2	8	11	8	8	2	1	2	3	3	2	2	2	2	11	2	2	2	8	8	8	8	2	2	2	2	2	2	1	2	2	2	1	1	1	2	1	1	2	2	2	2	2	2
2	2	2	2	2	2	2	8	11	11	8	1	2	5	8	8	2	2	11	2	11	2	2	2	2	2	2	2	2	2	2	2	1	2	1	2	2	2	2	2	2	2	1	2	2	2	8	5	8	8
3	3	3	3	3	3	3	3	3	3	3	3	3	3	3	3	3	3	3	2	3	3	3	3	3	3	3	3	3	3	3	3	5	3	3	11	3	3	3	3	3	3	3	3	3	3	3	3	3	3
3	3	3	3	3	3	3	3	3	3	3	3	3	3	3	3	3	3	3	2	11	3	3	3	3	3	3	3	3	3	3	3	5	3	3	3	3	3	3	3	3	3	3	3	3	3	3	3	3	3
3	3	3	3	3	3	3	3	3	3	3	3	11	3	3	11	3	3	3	2	3	11	3	3	3	3	3	3	3	3	3	3	3	3	11	3	3	3	3	3	3	3	3	3	3	3	3	3	3	3
3	3	3	3	3	3	3	3	3	3	3	3	3	3	2	3	3	3	3	3	3	3	3	3	3	3	3	3	3	3	3	3	3	3	3	3	3	3	3	3	3	3	3	3	3	3	3	3	3	3
3	3	3	3	3	3	3	3	3	3	3	3	3	3	2	2	3	3	3	3	3	2	3	3	3	3	3	3	3	3	3	3	3	3	8	3	3	3	3	3	3	3	3	3	3	3	3	3	3	3
3	3	3	3	3	3	3	3	3	3	3	3	3	3	2	3	3	3	3	3	3	3	3	3	3	3	3	3	3	3	3	3	3	3	3	3	3	3	3	3	3	3	3	3	3	3	3	3	3	3
3	3	3	3	3	3	8	3	3	3	3	3	3	3	3	3	3	3	3	3	3	3	3	3	3	3	3	3	3	3	3	3	8	11	2	3	3	3	3	3	3	3	3	3	3	3	3	3	3	3
3	3	3	3	3	3	3	3	3	3	2	3	3	3	3	3	3	3	3	3	3	3	3	3	3	3	3	3	3	3	11	3	2	11	3	3	3	3	3	3	3	3	3	3	3	3	3	3	3	3
3	3	3	3	3	11	3	3	11	3	11	3	3	3	4	3	3	3	3	11	3	3	3	3	3	3	3	3	3	3	11	3	4	2	2	11	2	3	3	3	11	3	3	3	3	2	3	3	3	2
4	4	4	4	4	6	6	6	6	6	1	4	4	4	5	4	4	4	4	4	4	4	4	4	4	1	1	4	4	4	4	4	1	4	4	4	1	6	6	6	6	6	4	4	4	4	6	6	6	5
4	4	6	6	1	4	1	4	4	6	4	4	4	6	4	4	4	4	4	4	4	4	4	4	6	4	4	4	4	4	4	1	4	4	4	4	4	4	4	6	4	4	4	4	4	4	4	6	6	4
4	4	4	4	4	4	4	4	4	4	4	4	4	4	4	4	4	4	4	4	4	4	4	4	4	4	4	4	4	4	4	4	4	4	4	4	4	4	4	4	4	4	4	4	4	4	4	6	4	8
4	4	4	4	4	4	4	4	4	4	4	4	4	7	4	4	4	4	4	4	4	4	4	4	4	4	4	4	4	4	4	4	4	4	6	4	4	4	4	4	4	4	4	4	4	4	4	4	4	4
4	4	4	4	4	4	4	4	4	4	4	4	4	4	4	4	4	4	4	4	4	4	4	4	4	4	4	4	4	4	4	7	7	4	7	7	4	4	4	4	4	4	4	4	4	4	4	4	4	4
4	4	4	4	4	4	4	4	4	4	4	4	4	4	4	4	4	4	4	4	4	7	4	4	4	4	4	4	4	4	4	4	4	4	4	4	4	4	4	4	4	4	4	4	4	4	4	4	4	4
4	4	4	4	4	4	4	4	4	4	4	4	4	4	4	4	4	4	4	4	6	4	4	4	4	4	4	4	4	4	4	4	4	4	4	4	4	4	4	4	4	4	4	4	4	4	4	4	4	4
4	4	4	4	4	4	4	4	4	4	4	4	4	4	4	4	4	4	4	4	6	4	4	4	4	4	4	4	4	4	4	4	4	4	4	4	4	4	4	4	4	4	4	4	4	4	4	4	4	4
4	4	4	4	4	4	4	4	4	4	4	4	4	4	11	4	4	4	4	4	4	4	4	4	4	4	4	4	4	4	4	4	4	4	4	4	4	4	4	4	4	4	4	4	4	4	4	4	4	4
5	1	2	5	8	5	5	5	6	5	5	5	6	5	5	7	5	6	5	6	6	4	5	6	5	6	6	6	6	5	5	5	5	8	11	6	6	8	5	5	5	5	5	5	5	5	5	5	5	6
5	5	1	6	1	8	6	5	8	6	1	6	8	6	8	5	6	8	4	4	6	6	6	6	6	6	6	6	4	6	8	6	3	5	8	6	6	6	5	6	6	5	6	6	6	6	6	5	6	6
5	5	2	5	8	6	1	5	6	5	8	8	6	5	6	11	8	6	5	6	6	4	5	8	5	5	8	8	5	11	2	8	3	3	11	5	8	6	6	6	6	6	5	6	6	8	8	5	5	5
5	5	5	5	6	5	5	6	8	5	5	5	5	5	5	8	6	5	6	6	5	5	5	8	5	5	8	8	8	5	2	5	5	8	8	5	8	5	5	5	5	5	5	5	5	8	5	5	5	5
5	6	6	5	6	5	5	6	5	5	8	6	5	5	8	7	5	5	5	6	5	8	6	8	5	3	3	3	8	6	6	5	3	5	5	5	3	6	5	5	8	5	8	8	8	6	6	5	5	6
5	6	5	6	5	6	5	1	5	1	6	5	6	5	6	6	5	5	1	6	6	5	1	1	2	1	1	1	1	8	5	8	5	8	8	8	8	5	6	5	6	5	6	5	1	8	5	6	5	5
5	5	5	5	6	5	1	1	5	1	1	6	6	6	8	6	1	5	1	8	1	8	5	5	5	8	6	6	8	1	2	2	2	6	6	2	6	2	2	2	2	1	2	2	8	2	5	5	5	5
5	6	5	5	6	5	5	5	5	1	6	1	2	1	8	2	1	5	1	1	1	1	5	8	8	5	5	8	8	1	1	2	6	1	1	2	6	5	5	5	5	1	2	8	8	1	6	5	5	6
5	6	5	5	6	5	5	5	5	1	6	5	6	1	6	6	8	5	1	6	1	1	5	8	5	5	5	8	8	1	6	2	6	6	2	2	5	5	5	5	5	5	8	8	8	8	5	5	5	5
6	8	6	5	5	8	6	5	8	6	5	5	8	6	5	8	5	8	6	6	5	5	6	6	6	6	5	5	6	5	8	6	5	8	8	5	5	6	5	6	6	6	6	6	6	6	5	5	6	5
6	5	1	5	8	8	6	5	6	6	2	5	8	6	6	5	6	6	4	5	5	4	5	8	6	8	2	8	5	5	8	6	3	5	5	5	8	6	6	6	6	6	6	6	6	6	5	5	6	5
6	6	6	11	6	8	8	6	5	5	6	6	8	5	6	6	6	8	8	5	6	6	6	6	6	6	6	1	6	5	8	5	5	5	8	5	6	6	6	6	6	6	6	6	4	6	6	8	5	5
6	6	4	4	6	6	4	6	6	7	8	6	6	4	5	7	6	4	4	5	5	5	6	6	6	6	5	5	6	6	6	4	2	2	5	6	6	6	4	4	6	6	4	4	6	6	6	6	4	6
6	6	6	6	6	6	6	6	6	6	6	6	6	6	5	5	6	6	6	6	6	5	6	6	6	6	6	6	6	1	6	1	1	1	1	4	4	6	6	6	6	6	6	6	6	4	6	6	6	6
6	4	4	4	6	4	6	4	4	6	1	4	4	6	6	6	6	4	6	5	6	6	4	6	6	6	6	6	6	6	4	6	2	6	6	6	6	4	4	4	6	6	6	6	6	6	4	4	6	6
6	5	5	5	6	6	6	1	5	5	6	5	6	6	6	6	5	5	5	5	1	5	6	5	6	6	6	6	8	6	1	6	6	6	6	1	6	5	5	5	5	1	5	5	5	5	6	5	5	6
6	5	5	5	5	5	5	1	6	5	5	5	5	5	5	6	6	6	5	5	1	8	5	6	5	5	6	6	8	1	1	1	6	1	1	1	1	5	5	5	5	5	5	5	5	6	6	6	6	6
6	6	6	6	6	6	5	6	6	5	6	6	6	5	5	6	5	5	5	5	1	8	6	6	5	6	6	6	8	1	6	1	6	1	1	1	6	5	5	5	5	1	5	8	5	1	6	6	5	6
7	7	7	7	7	7	7	7	7	7	7	7	7	7	7	5	7	7	7	7	7	7	7	7	7	7	7	7	7	7	7	7	7	7	7	7	7	7	7	7	7	7	7	7	7	7	7	7	7	7
7	7	7	7	7	7	7	7	7	7	7	4	7	4	7	11	7	7	7	7	7	7	7	7	7	7	7	7	7	7	7	7	7	7	7	7	7	7	7	7	7	7	7	7	7	7	7	7	7	7
7	7	7	7	7	7	7	7	7	7	7	7	7	7	7	11	7	7	7	7	7	7	7	7	7	7	7	7	7	7	7	7	7	8	5	7	7	7	7	7	7	7	7	7	7	7	7	7	7	7
7	7	7	7	7	7	7	7	7	7	7	7	7	7	7	11	7	7	7	7	7	7	7	7	7	7	3	7	7	7	7	7	7	7	7	7	7	7	7	7	7	7	7	7	7	7	7	7	7	7
7	7	7	7	7	7	7	7	7	7	7	7	7	7	7	11	7	7	7	7	7	7	7	7	7	7	7	7	7	7	7	7	7	3	7	7	7	7	7	7	7	7	7	7	7	7	7	7	7	7
7	7	7	7	7	7	7	7	7	7	7	7	7	7	7	3	7	7	7	7	7	7	7	7	7	7	7	7	7	7	7	7	7	2	7	7	7	7	7	7	7	7	7	7	7	7	7	7	7	7
7	7	7	7	7	7	7	7	7	7	7	7	7	7	7	5	7	7	7	7	7	7	7	7	7	7	7	7	7	7	7	7	7	4	7	7	7	7	7	7	7	7	7	7	7	7	7	7	7	7
7	7	7	7	7	7	7	7	7	4	4	7	7	4	7	6	7	7	7	7	4	7	7	7	7	7	7	7	7	7	7	7	7	4	7	7	7	7	7	7	7	4	7	7	7	7	7	7	7	7
7	7	7	7	7	7	7	7	7	7	7	7	7	7	7	8	7	7	7	7	7	7	7	7	7	7	7	7	7	7	7	7	7	7	7	7	7	7	7	7	7	7	7	7	7	7	7	7	7	7
8	11	8	8	11	11	11	11	11	8	11	8	8	11	4	5	8	8	8	4	5	5	8	5	8	4	6	6	6	8	3	8	11	5	5	5	6	5	5	8	11	5	6	6	6	5	8	11	8	11
8	8	11	11	8	8	11	8	8	11	2	8	8	8	8	5	8	8	8	8	5	5	8	6	5	6	6	6	6	8	8	11	3	3	3	8	5	2	5	2	8	5	5	6	6	5	8	11	11	8
8	8	8	8	8	8	8	8	8	11	3	8	8	11	5	7	8	11	8	8	5	8	8	8	8	3	8	5	5	2	11	2	2	2	11	6	5	8	8	8	8	5	8	8	8	6	8	8	8	8
8	8	11	11	11	8	11	11	5	11	3	8	8	2	8	3	8	8	8	1	11	6	8	8	5	3	3	3	3	8	8	5	3	3	5	8	3	11	8	8	8	11	8	8	3	8	11	8	8	8
8	8	8	8	8	5	8	8	2	3	5	8	8	2	5	2	8	8	2	8	8	8	2	2	2	2	2	2	2	8	8	8	5	11	8	8	2	8	8	8	8	11	8	8	8	8	8	8	8	8
8	8	8	8	8	8	8	8	2	8	8	8	8	2	1	8	8	8	11	8	1	1	8	8	8	8	8	8	8	2	8	2	2	2	2	2	2	8	8	8	8	2	8	8	8	8	8	8	8	8
8	8	8	8	5	5	5	2	1	2	6	8	2	2	5	1	8	8	2	5	1	1	2	2	2	5	2	2	2	2	2	2	5	6	2	2	2	8	8	8	5	2	8	8	8	8	8	8	8	5
8	8	8	8	5	5	1	2	2	2	5	8	2	1	8	1	8	8	1	1	2	1	8	8	8	8	8	8	8	2	2	2	6	2	2	2	5	8	8	8	8	2	8	8	8	8	5	8	5	5
8	8	8	8	8	5	8	2	8	8	1	8	8	2	8	1	8	8	8	1	1	1	8	8	8	8	8	8	8	2	6	2	2	2	2	2	5	8	8	8	8	2	8	8	8	8	8	8	8	8
9	9	9	9	9	9	9	9	9	9	9	9	9	9	9	9	9	9	9	9	9	9	9	9	9	9	9	9	9	9	9	9	9	9	9	9	9	9	9	9	9	9	9	9	9	9	9	9	9	9
9	9	9	9	9	9	9	9	9	9	9	9	9	9	9	9	9	9	9	10	9	9	9	9	9	9	9	9	9	9	9	9	9	9	9	9	9	9	9	9	9	9	9	9	9	9	9	9	9	9
9	9	9	9	9	9	9	9	9	9	9	9	9	9	9	9	9	9	9	9	9	9	9	9	9	9	9	9	9	9	9	9	9	9	9	9	9	9	9	9	9	9	9	9	9	9	9	9	9	9
9	9	9	9	9	9	9	9	9	9	9	9	9	9	9	9	9	9	9	9	9	9	9	9	9	9	9	9	9	9	9	9	9	9	9	9	9	9	9	9	9	9	9	9	9	9	9	9	9	9
9	9	9	9	9	9	9	9	9	9	9	9	9	9	9	9	9	9	9	9	9	9	9	9	9	9	9	9	9	9	9	9	9	9	9	9	9	9	9	9	9	9	9	9	9	9	9	9	9	9
9	9	9	9	9	9	9	9	9	9	9	9	9	9	9	9	9	9	9	9	9	9	9	9	9	9	9	9	9	9	9	9	9	9	9	9	9	9	9	9	9	9	9	9	9	9	9	9	9	9
9	9	9	9	9	9	9	9	9	9	9	9	9	9	9	9	9	9	9	9	9	9	9	9	9	9	9	9	9	9	9	9	9	9	9	9	9	9	9	9	9	9	9	9	9	9	9	9	9	9
9	9	9	9	9	9	9	9	9	9	9	9	9	9	9	9	9	9	9	9	9	9	9	9	9	9	9	9	9	9	9	9	9	9	9	9	9	9	9	9	9	9	9	9	9	9	9	9	9	9
9	9	9	9	9	9	9	9	9	9	9	9	9	9	9	9	9	9	9	9	9	9	9	9	9	9	9	9	9	9	9	9	9	9	9	9	9	9	9	9	9	9	9	9	9	9	9	9	9	9
10	10	10	10	10	10	10	10	10	10	10	10	10	10	10	10	10	10	10	10	10	10	10	10	10	10	10	10	10	10	10	10	10	10	10	10	10	10	10	10	10	10	10	10	10	10	10	10	10	10
10	10	10	10	10	10	10	10	10	10	10	10	10	10	10	10	10	10	10	10	10	10	10	10	10	10	10	10	10	10	10	10	10	10	10	10	10	10	10	10	10	10	10	10	10	10	10	10	10	10
10	10	10	10	10	10	10	10	10	10	10	10	10	10	10	10	10	10	10	10	10	10	10	10	10	10	10	10	10	10	10	10	10	10	10	10	10	10	10	10	10	10	10	10	10	10	10	10	10	10
10	10	10	10	10	10	10	10	10	10	10	10	10	10	10	10	10	10	10	10	10	10	10	10	10	10	10	10	10	10	10	10	10	10	10	10	10	10	10	10	10	10	10	10	10	10	10	10	10	10
10	10	10	10	10	10	10	10	10	10	10	10	10	10	10	10	10	10	10	10	10	10	10	10	10	10	10	10	10	10	10	10	10	10	10	10	10	10	10	10	10	10	10	10	10	10	10	10	10	10
10	10	10	10	10	10	10	10	10	10	10	10	10	10	10	10	10	10	10	10	10	10	10	10	10	10	10	10	10	10	10	10	10	10	10	10	10	10	10	10	10	10	10	10	10	10	10	10	10	10
10	10	10	10	10	10	10	10	10	10	10	10	10	10	10	10	10	10	10	10	10	10	10	10	10	10	10	10	10	10	10	10	10	10	10	10	10	10	10	10	10	10	10	10	10	10	10	10	10	10
10	10	10	10	10	10	10	10	10	10	10	10	10	10	10	10	10	10	10	10	10	10	10	10	10	10	10	10	10	10	10	10	10	10	10	10	10	10	10	10	10	10	10	10	10	10	10	10	10	10
10	10	10	10	10	10	10	10	10	10	10	10	10	10	10	10	10	10	10	10	10	10	10	10	10	10	10	10	10	10	10	10	10	10	10	10	10	10	10	10	10	10	10	10	10	10	10	10	10	10
11	11	5	8	11	11	4	8	11	5	11	11	11	11	11	11	11	2	1	11	8	11	11	11	11	11	11	11	11	2	11	1	4	2	11	6	11	8	8	5	11	11	11	2	11	11	11	11	11	11
11	11	11	11	11	11	11	3	11	11	11	11	8	11	11	11	11	8	8	11	11	11	11	11	11	11	11	11	11	3	11	8	11	3	11	11	11	11	11	11	11	3	11	11	11	8	11	11	11	11
11	8	11	11	11	11	11	8	11	8	11	11	11	11	11	11	11	11	2	11	2	11	11	11	11	11	11	11	11	8	8	8	11	3	11	11	11	5	8	11	11	8	11	8	11	8	11	11	11	11
11	8	11	11	11	11	11	8	2	8	11	11	11	11	11	7	11	11	2	11	11	3	11	11	11	11	11	11	11	8	3	8	11	3	3	3	11	11	11	11	11	11	3	3	11	11	11	11	11	11
11	11	11	3	11	11	11	11	3	3	11	11	3	3	11	3	3	11	3	11	11	3	11	11	11	11	11	11	11	11	3	8	11	3	3	3	11	11	11	11	11	11	11	11	11	8	11	8	11	11
11	3	8	3	11	11	11	11	11	8	11	3	3	3	11	7	3	3	3	11	11	3	11	11	11	11	11	11	11	11	3	8	11	8	3	3	11	11	3	11	11	11	3	3	11	11	11	11	8	11
11	11	11	11	8	11	11	11	11	11	3	11	11	11	11	11	8	11	8	2	11	11	11	11	11	11	11	11	11	11	11	2	2	2	11	2	11	11	11	11	8	11	11	11	11	11	11	11	11	11
11	3	11	3	11	11	11	11	11	8	11	11	11	11	11	11	3	3	3	11	3	11	11	11	11	11	11	11	11	11	11	2	11	2	11	2	11	8	8	8	11	11	11	11	11	8	11	11	11	11
11	11	11	11	11	11	11	11	11	5	11	11	11	5	8	11	8	8	8	2	11	11	11	11	11	11	11	11	11	5	11	6	11	2	11	2	11	11	11	11	11	8	8	8	11	6	11	11	11	11
[truncated: 6 more columns]

## Sheet: 3 combinations
code	67	68	69	70	71	72	73	74	75	76	77	78	79	80	81	82	83	84	85	86	87	88	89	90	91	92	93	94	95	96	97	98	99	100	101	102	103	104	105	106	107	108	109	110	111	112	113	114	115
1	1	2	2	2	2	1	2	2	2	2	2	1	2	2	2	1	2	2	2	1	2	2	2	2	2	2	11	11	11	2	2	2	2	3	2	2	5	5	2	2	2	2	2	2	2	2	8	2	2
1	2	1	2	2	1	2	2	2	2	2	1	2	2	2	2	2	5	1	8	1	1	2	1	1	1	8	5	5	5	6	5	5	8	8	5	1	2	1	1	2	2	1	1	1	1	1	1	2	2
1	5	1	1	1	5	1	5	2	2	2	5	1	5	1	1	8	5	5	8	8	5	5	5	1	1	8	5	5	5	6	5	5	8	8	8	1	1	1	2	2	2	2	1	2	2	2	1	2	2
1	1	5	5	5	5	5	5	6	6	5	1	1	1	5	6	5	6	6	1	6	1	1	1	5	5	5	1	1	1	2	1	1	1	5	1	1	1	1	1	1	6	1	1	1	1	1	1	1	1
1	1	1	6	5	5	6	5	1	1	6	1	5	5	1	6	6	6	6	6	2	1	5	1	1	1	1	1	1	1	1	1	1	5	1	6	1	1	1	1	1	1	4	4	4	1	1	1	1	1
1	1	2	1	1	2	1	1	6	6	6	2	1	1	2	2	1	2	2	1	6	1	1	1	1	1	1	1	1	1	2	1	1	1	8	1	1	1	1	6	6	6	6	6	6	6	6	6	6	6
1	1	1	1	1	1	1	1	1	6	6	1	1	1	1	8	8	5	8	5	5	1	1	1	1	1	1	1	1	1	2	2	2	2	2	8	2	1	2	2	2	2	1	2	2	2	2	2	2	2
1	2	2	2	2	2	2	2	2	2	2	1	2	2	1	1	2	2	2	2	1	1	2	2	1	2	8	1	2	8	1	1	1	2	2	1	1	1	2	1	1	1	1	1	2	1	1	1	1	1
1	1	2	1	1	2	1	2	6	5	5	2	1	1	1	5	8	5	8	8	5	1	5	1	1	1	5	1	1	1	6	1	2	1	8	8	2	1	2	1	6	1	6	6	6	2	6	6	6	6
2	2	2	8	8	2	2	2	2	2	2	2	8	8	2	2	2	2	1	2	1	2	8	8	1	1	8	1	8	8	6	1	8	8	8	1	2	2	2	2	2	2	2	2	2	2	2	2	2	2
2	1	2	2	1	2	2	1	2	2	2	2	2	1	2	2	1	2	2	2	2	2	2	2	2	2	2	11	11	2	2	2	2	2	2	2	2	2	1	2	2	1	2	2	2	2	2	2	2	2
2	2	2	2	2	1	2	1	2	1	2	2	8	2	8	1	8	8	5	8	8	1	2	1	1	1	8	1	1	8	6	8	1	8	1	8	1	2	1	1	1	1	1	1	1	1	1	1	1	1
2	5	1	1	1	5	1	1	1	1	1	5	5	1	1	1	1	5	5	5	1	5	1	1	1	1	1	5	1	1	6	1	1	1	1	5	1	1	1	1	1	1	1	1	1	1	1	1	1	1
2	2	1	2	8	1	2	1	6	5	5	2	2	2	1	1	1	1	1	1	6	2	2	8	1	1	1	2	2	2	2	1	1	1	1	1	1	2	1	1	1	1	1	1	1	1	1	1	1	1
2	2	2	2	2	2	8	2	5	5	5	2	2	2	2	2	2	2	2	2	6	2	2	2	2	2	2	2	2	2	2	2	2	2	2	2	2	8	8	6	6	6	6	5	5	6	6	6	6	6
2	2	2	2	2	8	8	8	2	8	2	2	2	2	2	8	8	8	8	8	8	2	2	2	2	2	2	11	11	11	2	2	2	3	3	3	2	2	2	2	2	2	5	8	2	2	8	8	8	8
2	2	2	2	2	8	8	11	8	8	8	2	2	2	2	8	8	8	2	8	3	2	2	2	2	2	2	11	11	11	3	2	2	2	2	3	2	2	8	2	8	8	2	8	8	8	8	8	8	8
2	2	2	2	2	8	2	8	8	8	8	2	1	2	1	2	1	8	8	8	8	2	2	2	2	2	2	11	11	11	2	2	2	2	2	2	2	2	2	2	2	2	2	2	2	2	2	2	2	2
3	3	3	3	3	3	3	3	3	3	3	3	3	3	3	3	3	3	3	3	3	3	3	3	3	3	3	3	3	3	3	3	3	3	3	3	3	3	3	3	3	3	3	3	3	3	3	3	3	3
3	3	3	3	3	3	3	3	3	3	3	3	3	3	3	3	3	3	3	3	3	3	3	3	3	3	3	11	11	3	3	11	11	11	3	11	3	3	3	3	3	3	3	3	3	3	3	3	3	3
3	3	3	3	3	3	3	3	3	3	3	3	3	3	3	3	3	11	11	11	3	3	3	3	3	3	3	3	3	3	3	11	11	11	11	11	3	3	3	3	3	3	3	3	3	3	3	3	3	3
3	3	3	3	3	3	3	3	3	3	3	3	3	3	3	3	3	3	3	3	3	3	3	3	3	3	3	3	3	3	3	3	3	3	3	3	3	3	3	3	3	3	3	3	3	3	3	3	3	3
3	3	3	3	3	3	3	3	3	3	3	3	3	3	3	3	3	3	3	3	2	3	3	3	3	3	3	3	3	3	3	3	3	3	2	3	3	3	3	3	3	3	3	3	3	3	3	3	3	3
3	3	3	3	3	3	3	3	3	3	3	3	3	3	3	3	3	3	3	3	6	3	3	3	3	3	3	3	3	3	3	3	3	3	3	3	3	3	3	3	3	3	3	3	3	3	3	3	3	3
3	3	3	3	3	3	3	3	3	3	3	3	3	3	3	3	3	3	3	3	3	3	3	3	3	3	3	3	3	3	3	3	3	3	3	3	3	3	3	3	3	3	3	3	3	3	3	3	3	3
3	3	3	3	3	3	3	3	8	3	3	3	3	3	3	3	3	3	3	3	8	3	3	3	3	3	3	3	3	3	3	3	3	3	3	3	3	3	3	3	3	3	3	3	3	3	3	3	3	3
3	3	11	3	2	3	3	3	11	11	11	3	3	3	11	11	11	3	3	3	11	3	3	3	11	11	11	3	3	3	2	3	3	3	11	3	3	3	3	3	8	3	3	3	3	2	3	3	3	2
4	4	4	6	6	6	6	6	1	1	1	4	4	4	4	5	5	4	4	4	11	4	4	4	4	4	4	4	4	4	4	4	4	4	5	7	4	4	4	1	1	1	4	4	4	1	4	4	4	4
4	6	4	6	4	4	6	6	4	4	4	4	6	4	4	4	4	4	4	4	4	4	4	4	4	4	4	4	4	4	4	4	4	4	4	4	4	6	4	4	4	4	4	4	4	4	4	4	4	4
4	4	4	4	4	4	4	4	4	4	4	4	4	4	4	4	4	4	4	4	4	4	4	4	4	4	4	4	4	4	4	4	4	4	4	4	4	4	4	4	4	4	4	4	4	4	4	4	4	4
4	4	4	4	4	4	4	4	4	4	4	4	4	4	4	4	4	4	4	4	4	4	4	4	4	4	4	4	4	4	4	4	4	4	4	4	4	4	4	4	4	4	4	4	4	4	4	4	4	4
4	4	4	4	4	4	4	4	4	4	4	4	4	4	4	4	4	4	4	4	4	4	4	4	4	4	4	4	4	4	4	4	4	4	4	4	4	4	4	4	4	4	4	4	4	4	4	4	4	4
4	4	4	4	4	4	4	4	4	4	4	4	4	4	4	4	4	4	4	4	4	4	4	4	4	4	4	4	4	4	4	4	4	4	4	4	4	4	4	4	4	4	4	4	4	4	4	4	4	4
4	4	4	4	4	4	4	4	4	4	4	4	4	4	4	4	4	4	4	4	4	4	4	4	4	4	4	4	4	4	4	4	4	4	4	4	4	4	4	4	4	4	4	4	4	4	4	4	4	4
4	4	4	4	4	4	4	4	4	4	4	4	4	4	4	4	4	4	4	4	4	4	4	4	4	4	4	4	4	4	4	4	4	4	4	4	4	4	4	4	4	4	4	4	4	4	4	4	4	4
4	4	4	4	4	4	4	4	4	4	4	4	4	4	4	4	4	4	4	4	4	4	4	4	4	4	4	4	4	4	4	4	4	4	4	4	4	4	4	4	4	4	4	4	4	4	4	4	4	4
5	1	5	5	5	5	1	5	8	5	5	5	5	5	5	5	5	7	7	7	3	5	5	5	6	6	6	6	6	6	11	6	4	4	6	7	5	5	5	6	6	6	8	8	8	6	8	6	8	6
5	6	8	6	6	5	6	6	1	2	1	5	6	6	6	8	6	6	5	6	1	5	6	6	4	8	4	6	6	6	6	6	6	4	4	6	6	6	6	6	6	6	6	6	6	6	6	6	6	6
5	5	5	8	5	5	5	5	8	8	8	5	8	5	8	5	5	11	7	11	11	5	5	5	6	6	6	6	6	6	11	8	5	5	5	7	5	5	5	8	8	8	8	8	8	8	8	8	8	5
5	5	5	5	5	5	5	5	8	5	8	5	5	5	5	5	5	5	8	5	3	5	5	5	6	5	5	5	5	5	8	5	5	5	5	8	5	5	8	8	8	8	8	8	8	3	8	8	8	8
5	6	6	6	5	6	6	5	2	8	2	5	5	5	6	5	5	5	7	5	8	6	5	5	6	5	6	5	5	5	11	5	5	5	8	8	5	5	8	3	3	3	2	2	2	3	8	8	8	3
5	5	6	5	5	5	1	5	6	6	5	6	5	5	6	6	5	6	6	5	6	5	1	5	6	6	5	5	5	5	2	5	5	5	5	6	1	1	1	6	1	6	1	1	1	2	1	1	1	6
5	5	5	5	5	5	1	5	1	1	6	6	1	5	1	6	1	6	6	6	6	5	1	5	1	1	1	1	1	1	1	1	6	1	8	6	5	5	5	5	6	5	6	6	6	6	2	2	2	6
5	5	5	5	5	5	1	5	6	6	6	6	1	1	6	6	6	1	1	1	6	5	1	5	1	1	5	1	1	1	2	1	1	1	8	1	8	5	8	5	5	5	5	5	5	5	8	8	8	6
5	5	6	5	5	5	5	5	6	6	5	5	5	5	6	6	5	1	6	1	6	5	5	5	6	6	5	1	1	1	2	1	1	1	5	1	5	5	5	5	5	5	5	5	5	5	8	8	8	5
6	5	8	6	6	5	6	5	3	3	8	8	6	6	5	8	6	8	8	5	3	8	6	6	5	5	6	5	8	5	8	5	8	6	5	5	5	6	6	5	5	6	8	8	5	5	5	5	5	5
6	5	8	5	5	5	6	6	2	2	2	8	6	6	1	2	6	5	5	6	1	5	6	6	5	5	4	6	6	6	11	6	6	4	6	6	5	5	5	8	8	2	2	2	2	2	8	8	2	8
6	6	6	6	8	5	5	5	6	5	5	6	6	8	6	2	1	1	1	1	2	6	5	8	6	5	8	6	6	5	6	6	6	6	6	6	6	6	6	6	6	6	6	6	6	6	1	1	6	1
6	4	6	6	4	6	6	6	8	2	1	6	4	4	5	5	4	5	5	7	8	6	4	4	5	6	6	5	6	6	11	5	6	4	5	5	6	6	6	6	6	6	8	5	6	8	5	5	6	5
6	6	6	6	6	6	6	6	1	1	6	6	6	6	6	5	6	7	6	6	8	6	6	6	6	6	6	6	6	6	6	6	6	6	5	6	6	6	6	6	6	6	6	6	6	6	6	6	6	6
6	4	4	6	6	4	6	6	1	1	1	4	6	6	6	6	6	6	6	6	1	4	6	6	6	6	6	6	6	6	6	6	6	6	6	6	4	6	6	6	1	6	6	6	6	6	1	1	6	6
6	5	5	5	5	5	5	6	6	6	6	5	5	5	6	6	6	6	6	6	2	5	5	5	5	5	5	1	1	1	1	5	5	6	5	6	5	6	5	6	6	6	6	6	6	6	6	6	6	6
6	5	5	5	5	5	1	5	5	5	5	5	5	5	5	5	5	6	6	6	6	5	5	6	5	5	5	1	1	1	2	5	5	5	5	6	5	5	5	5	6	5	6	6	6	5	6	6	6	6
6	6	6	6	6	6	6	6	6	6	6	6	6	5	6	6	6	6	6	6	6	6	5	6	5	5	5	1	1	1	2	5	5	5	5	6	6	6	5	6	6	6	6	6	6	6	6	6	6	6
7	7	7	7	7	7	7	7	7	7	7	7	7	7	7	7	7	4	7	4	4	7	7	7	7	7	7	7	7	7	7	7	7	7	7	4	7	7	7	7	7	7	7	7	7	7	7	7	7	7
7	7	7	7	7	7	7	7	7	7	7	7	7	7	7	7	7	7	7	7	7	7	7	7	7	7	7	7	7	7	7	7	7	7	7	7	7	7	7	7	7	7	7	7	7	7	7	7	7	7
7	7	7	7	7	7	7	7	7	7	7	7	7	7	7	7	7	7	7	7	7	7	7	7	7	7	7	7	7	7	7	7	7	7	7	7	7	7	7	7	7	7	7	7	7	7	7	7	7	7
7	7	7	7	7	7	7	7	7	7	7	7	7	7	7	7	7	8	11	7	11	7	7	7	7	7	7	7	7	7	7	7	7	7	7	5	7	7	7	7	7	7	7	7	7	7	7	7	7	7
7	7	7	7	7	7	7	7	7	7	7	7	7	7	7	7	7	7	11	7	7	7	7	7	7	7	7	7	7	7	7	7	7	7	7	7	7	7	7	7	7	7	7	7	7	7	7	7	7	7
7	7	7	7	7	7	7	7	7	7	7	7	7	7	7	7	7	8	3	5	11	7	7	7	7	7	7	7	7	7	7	7	7	7	7	7	7	7	7	7	7	7	7	7	7	7	7	7	7	7
7	7	7	7	7	7	7	7	7	7	7	7	7	7	7	7	7	6	5	6	7	7	7	7	7	7	7	7	7	7	7	7	7	7	7	7	7	7	7	7	7	7	7	7	7	7	7	7	7	7
7	7	7	7	7	7	4	7	4	7	7	7	7	7	7	7	7	4	6	6	4	7	7	7	7	7	7	4	7	4	4	7	7	7	7	4	7	7	7	7	7	7	7	7	7	7	7	7	7	7
7	7	7	7	7	7	7	7	7	7	7	7	7	7	7	7	7	6	8	6	7	7	7	7	7	7	7	7	7	7	7	7	7	7	7	7	7	7	7	7	7	7	7	7	7	7	7	7	7	7
8	8	11	11	11	11	8	11	11	11	11	8	8	11	2	11	11	5	7	11	7	8	8	8	11	11	11	5	5	1	11	8	8	8	4	5	5	8	5	6	6	6	6	6	5	6	6	5	5	4
8	11	8	11	11	8	8	8	8	8	8	8	8	8	8	8	8	8	8	8	8	8	8	8	8	8	8	8	8	8	11	8	8	8	8	5	5	5	5	6	6	6	6	5	5	6	6	6	6	6
8	8	8	8	8	8	11	11	8	8	8	8	11	11	8	11	8	11	7	11	11	11	11	8	8	8	8	8	8	8	11	8	8	8	1	8	8	8	8	3	3	3	8	8	8	8	3	3	3	5
8	11	11	11	11	8	11	11	3	11	3	8	8	8	2	2	2	3	2	2	2	8	11	8	11	8	8	11	8	11	5	8	6	1	1	2	8	8	8	3	3	3	3	3	3	3	3	3	3	3
8	8	8	8	8	8	8	8	5	5	8	8	8	2	1	2	8	2	2	2	5	8	8	8	8	8	8	8	8	2	2	8	8	8	8	1	2	2	2	2	2	2	2	2	2	2	2	2	2	2
8	8	8	8	8	2	8	8	8	8	8	8	8	8	8	8	8	8	8	8	5	8	11	8	8	8	8	2	8	2	2	8	8	2	1	8	8	8	8	8	8	8	5	8	8	8	8	8	8	8
8	8	5	5	5	2	2	2	5	5	5	8	2	2	5	5	5	1	1	1	5	8	8	8	5	5	5	1	1	1	2	1	1	1	5	1	8	2	2	5	5	5	5	5	5	5	2	2	2	6
8	8	5	5	5	2	2	2	5	5	5	8	2	2	1	1	1	2	2	1	6	8	8	8	8	8	1	2	2	2	2	8	2	1	1	1	8	8	8	5	5	5	5	8	5	5	8	8	8	8
8	8	5	8	8	1	2	2	2	2	8	8	8	8	1	2	2	2	1	2	6	8	8	8	8	8	8	8	1	2	2	1	1	1	1	1	8	8	8	8	8	8	8	8	8	8	8	8	8	8
9	9	9	9	9	9	9	9	9	9	9	9	9	9	9	9	9	9	9	9	9	9	9	9	9	9	9	9	9	9	9	9	9	9	9	9	9	9	9	9	9	9	9	9	9	9	9	9	9	9
9	9	9	9	9	9	9	9	9	9	9	9	9	9	9	9	9	9	9	9	9	9	9	9	9	9	9	9	9	9	9	9	9	9	9	9	9	9	9	9	9	9	9	9	9	9	9	9	9	9
9	9	9	9	9	9	9	9	9	9	9	9	9	9	9	9	9	9	9	9	9	9	9	9	9	9	9	9	9	9	9	9	9	9	9	9	9	9	9	9	9	9	9	9	9	9	9	9	9	9
9	9	9	9	9	9	9	9	9	9	9	9	9	9	9	9	9	9	9	9	9	9	9	9	9	9	9	9	9	9	9	9	9	9	9	9	9	9	9	9	9	9	9	9	9	9	9	9	9	9
9	9	9	9	9	9	9	9	9	9	9	9	9	9	9	9	9	9	9	9	9	9	9	9	9	9	9	9	9	9	9	9	9	9	9	9	9	9	9	9	9	9	9	9	9	9	9	9	9	9
9	9	9	9	9	9	9	9	9	9	9	9	9	9	9	9	9	9	9	9	9	9	9	9	9	9	9	9	9	9	9	9	9	9	9	9	9	9	9	9	9	9	9	9	9	9	9	9	9	9
9	9	9	9	9	9	9	9	9	9	9	9	9	9	9	9	9	9	9	9	9	9	9	9	9	9	9	9	9	9	9	9	9	9	9	9	9	9	9	9	9	9	9	9	9	9	9	9	9	9
9	9	9	9	9	9	9	9	9	9	9	9	9	9	9	9	9	9	9	9	9	9	9	9	9	9	9	9	9	9	9	9	9	9	9	9	9	9	9	9	9	9	9	9	9	9	9	9	9	9
9	9	9	9	9	9	9	9	9	9	9	9	9	9	9	9	9	9	9	9	9	9	9	9	9	9	9	9	9	9	9	9	9	9	9	9	9	9	9	9	9	9	9	9	9	9	9	9	9	9
10	10	10	10	10	10	10	10	10	10	10	10	10	10	10	10	10	10	10	10	10	10	10	10	10	10	10	10	10	10	9	10	10	10	10	10	10	10	10	10	10	10	10	10	10	10	10	10	10	10
10	10	10	10	10	10	10	10	10	10	10	10	10	10	10	10	10	10	10	10	10	10	10	10	10	10	10	10	10	10	10	10	10	10	10	10	10	10	10	10	10	10	10	10	10	10	10	10	10	10
10	10	10	10	10	10	10	10	10	10	10	10	10	10	10	10	10	10	10	10	10	10	10	10	10	10	10	10	10	10	10	10	10	10	10	10	10	10	10	10	10	10	10	10	10	10	10	10	10	10
10	10	10	10	10	10	10	10	10	10	10	10	10	10	10	10	10	10	10	10	10	10	10	10	10	10	10	10	10	10	10	10	10	10	10	10	10	10	10	10	10	10	10	10	10	10	10	10	10	10
10	10	10	10	10	10	10	10	10	10	10	10	10	10	10	10	10	10	10	10	10	10	10	10	10	10	10	10	10	10	10	10	10	10	10	10	10	10	10	10	10	10	10	10	10	10	10	10	10	10
10	10	10	10	10	10	10	10	10	10	10	10	10	10	10	10	10	10	10	10	10	10	10	10	10	10	10	10	10	10	10	10	10	10	10	10	10	10	10	10	10	10	10	10	10	10	10	10	10	10
10	10	10	10	10	10	10	10	10	10	10	10	10	10	10	10	10	10	10	10	10	10	10	10	10	10	10	10	10	10	10	10	10	10	10	10	10	10	10	10	10	10	10	10	10	10	10	10	10	10
10	10	10	10	10	10	10	10	10	10	10	10	10	10	10	10	10	10	10	10	10	10	10	10	10	10	10	10	10	10	10	10	10	10	10	10	10	10	10	10	10	10	10	10	10	10	10	10	10	10
10	10	10	10	10	10	10	10	10	10	10	10	10	10	10	10	10	10	10	10	10	10	10	10	10	10	10	10	10	10	10	10	10	10	10	10	10	10	10	10	10	10	10	10	10	10	10	10	10	10
11	8	11	11	11	11	2	8	11	11	11	11	11	11	11	11	11	11	11	11	11	8	1	8	11	11	1	8	8	5	6	11	11	11	11	11	11	11	11	11	11	11	11	11	11	11	11	11	11	11
11	11	11	11	11	11	11	11	11	11	11	11	11	11	11	11	11	11	11	11	11	11	11	11	11	11	11	11	11	11	11	11	11	11	11	11	11	11	11	11	11	11	11	11	11	11	11	11	11	11
11	11	11	11	11	8	8	8	11	11	11	11	11	11	11	11	11	11	11	11	11	8	8	8	11	11	11	8	8	8	11	11	11	11	11	11	11	11	11	11	11	11	11	11	11	11	11	11	11	11
11	11	11	11	11	8	8	8	11	11	11	11	8	11	11	11	11	8	8	8	11	11	11	11	11	11	11	11	11	11	1	3	3	3	11	3	11	11	11	11	11	11	11	11	11	11	11	11	11	11
11	3	11	11	11	11	3	3	11	11	11	3	3	3	11	11	3	3	3	3	11	11	3	3	11	11	11	11	11	11	11	3	3	3	11	3	11	11	11	11	11	11	11	11	11	11	11	11	11	11
11	3	11	11	11	11	11	11	11	11	11	3	3	3	3	11	11	11	11	8	11	3	3	3	11	11	11	11	11	11	11	3	3	3	11	11	11	11	11	11	11	11	11	11	11	11	11	11	11	11
11	11	11	11	11	11	11	11	3	3	3	11	11	11	11	11	11	11	11	11	11	11	8	11	11	11	2	11	11	11	8	11	11	11	11	11	11	11	11	11	11	11	11	11	11	11	11	11	11	11
11	3	11	11	11	11	11	3	11	11	11	11	11	11	11	11	11	11	11	11	11	3	3	3	3	3	3	3	3	3	2	11	11	3	11	11	11	11	11	11	11	11	11	11	11	11	11	11	11	11
11	11	11	11	11	11	2	8	11	11	11	11	8	11	11	11	8	11	11	11	11	11	8	11	11	11	2	11	11	11	8	11	11	11	11	11	11	11	11	11	11	11	11	11	11	11	11	11	11	11
[truncated: 116 more columns]

## Sheet: 4 combinations
code	232	233	234	235	236	237	238	239	240	241	242	243	244	245	246	247	248	249	250	251	252	253	254	255	256	257	258	259	260	261	262	263	264	265	266	267	268	269	270	271	272	273	274	275	276	277	278	279	280
1	2	1	2	2	2	2	2	1	2	2	1	2	1	5	1	2	2	2	2	2	2	2	2	2	2	2	2	2	2	2	2	2	2	2	2	5	2	2	2	2	2	2	2	2	2	2	2	2	2
1	2	2	1	2	2	2	2	2	2	1	2	1	1	6	1	1	1	1	1	5	5	5	6	6	6	5	8	8	1	1	1	5	5	1	6	1	1	2	2	1	1	1	1	1	1	1	1	1	2
1	1	5	1	2	2	5	1	2	1	5	5	5	1	5	5	5	1	1	1	5	5	5	6	6	6	5	5	5	1	8	1	5	5	8	5	1	2	2	2	1	2	1	1	2	2	1	2	1	2
1	5	5	6	6	5	1	6	5	6	6	6	6	6	6	2	1	5	5	5	1	1	1	2	1	2	1	1	5	5	8	5	1	5	1	2	1	1	6	6	1	1	1	1	1	1	1	1	1	1
1	5	5	1	6	6	1	6	6	6	6	6	6	6	6	6	1	1	1	1	1	1	1	1	1	6	1	5	5	1	1	1	6	6	6	6	1	1	1	1	1	4	4	1	1	1	1	1	1	1
1	1	1	6	6	5	1	6	1	6	2	1	1	6	6	6	1	1	1	1	1	1	1	2	2	2	1	1	1	1	8	8	1	1	1	2	1	6	6	6	6	6	6	6	6	6	6	6	6	6
1	1	1	6	6	5	1	5	1	1	5	5	1	5	5	5	1	1	1	1	1	1	1	1	2	1	2	2	2	8	2	2	8	2	8	8	1	2	2	2	1	1	2	2	2	2	2	1	2	2
1	2	2	1	2	2	2	1	2	2	2	2	2	1	1	2	2	1	2	2	1	8	2	1	1	8	1	2	2	1	2	2	1	2	2	1	2	1	1	1	1	2	5	1	1	1	1	1	6	1
1	1	2	5	6	5	1	5	5	5	8	5	8	5	8	8	1	1	5	1	1	1	1	1	1	1	1	1	1	8	8	8	1	8	8	8	2	6	1	6	6	6	6	2	6	2	6	6	6	6
2	2	2	2	2	2	8	2	2	8	2	2	2	1	6	2	2	1	8	8	1	8	8	6	5	5	1	8	8	1	1	1	1	1	1	6	2	2	2	2	2	2	2	2	2	2	2	2	2	2
2	2	2	2	2	2	2	2	2	1	2	2	2	6	2	6	2	2	2	2	11	2	2	2	2	2	2	2	2	2	2	2	2	2	2	2	2	2	2	2	2	2	2	2	2	2	2	2	2	2
2	2	2	2	2	2	2	5	8	1	8	8	8	8	8	8	1	1	8	1	1	1	1	1	5	5	1	8	1	8	1	8	8	8	8	8	1	1	1	1	1	1	1	1	1	1	1	1	1	1
2	1	1	1	1	1	5	1	1	1	5	5	5	1	1	1	5	1	1	1	5	5	1	6	6	6	1	1	1	1	1	1	5	1	1	6	1	1	1	1	1	1	1	1	1	1	1	1	1	1
2	2	1	5	5	5	2	6	1	2	1	1	1	6	6	6	2	1	2	8	2	2	2	2	2	2	1	1	1	1	1	1	1	1	1	6	1	1	1	1	1	1	1	1	1	1	1	1	1	1
2	2	2	5	5	5	2	2	2	2	2	2	2	6	6	2	2	2	2	2	2	2	2	2	2	2	2	2	2	2	2	2	2	2	2	2	2	6	6	5	5	5	5	6	6	6	6	6	6	6
2	2	8	2	2	2	2	8	8	8	8	8	8	8	8	8	2	2	2	2	2	11	2	2	2	2	2	2	2	3	3	3	2	2	2	8	2	2	2	2	8	5	8	2	2	2	8	8	8	2
2	2	8	8	8	8	2	2	8	8	8	8	8	8	8	8	2	2	2	2	11	11	11	2	2	3	2	2	2	2	2	2	2	2	2	3	2	2	2	8	8	8	8	2	8	8	8	8	8	2
2	2	8	8	2	8	2	2	1	2	8	2	8	5	8	5	2	2	2	2	2	2	2	2	2	8	2	2	2	2	2	2	2	2	2	2	2	2	2	2	2	2	2	2	2	2	2	2	2	2
3	3	3	3	3	3	3	3	3	3	3	3	3	3	3	3	3	3	3	3	3	3	3	3	3	3	3	3	3	3	3	3	3	3	3	3	3	3	3	3	3	3	3	3	3	3	3	3	3	3
3	3	3	3	3	3	3	3	3	3	3	3	3	3	3	3	3	3	3	3	3	3	3	3	3	3	11	3	3	3	3	3	3	3	3	3	3	3	3	3	3	3	3	3	3	3	3	3	3	3
3	3	3	3	3	3	3	3	3	3	11	3	3	3	3	3	3	3	3	3	3	3	3	3	3	3	11	3	3	3	11	3	11	11	11	3	3	3	3	3	3	3	3	3	3	3	3	3	3	3
3	3	3	3	3	3	3	3	3	3	3	3	3	3	3	3	3	3	3	3	3	3	3	3	3	3	3	3	3	3	3	3	3	3	3	3	3	3	3	3	3	3	3	3	3	3	3	3	3	3
3	3	3	3	3	3	3	3	3	3	3	3	3	3	3	2	3	3	3	3	3	3	3	3	3	3	3	3	3	3	3	3	3	3	3	2	3	3	3	3	3	3	3	3	3	3	3	3	3	3
3	3	3	3	3	3	3	3	3	3	3	3	3	3	3	3	3	3	3	3	3	3	3	3	3	3	3	3	3	3	3	3	3	3	3	3	3	3	3	3	3	3	3	3	3	3	3	3	3	3
3	3	3	3	3	3	3	3	3	3	3	3	3	3	3	3	3	3	3	3	3	3	3	3	3	3	3	3	3	3	3	3	3	3	3	3	3	3	3	3	3	3	3	3	3	3	3	3	3	3
3	3	3	3	3	3	3	3	3	3	3	3	3	3	3	3	3	3	3	3	3	3	3	3	3	3	3	3	3	3	3	3	3	3	3	3	3	3	3	3	3	3	3	3	3	3	3	3	3	3
3	3	3	11	11	11	3	11	11	11	3	3	3	8	8	8	3	11	11	11	3	3	3	2	8	8	3	3	3	11	11	11	3	3	3	8	3	8	3	8	3	3	3	8	2	2	3	3	3	8
4	6	6	1	1	6	4	1	4	5	4	4	4	11	7	11	4	4	4	4	4	4	4	4	4	4	4	4	4	5	5	5	4	4	4	4	4	1	1	1	4	4	4	1	1	1	4	4	4	4
4	4	6	4	4	4	4	4	4	4	4	4	4	4	4	4	4	4	4	4	4	4	4	4	4	4	4	4	4	4	4	4	4	4	4	4	4	4	4	4	4	4	4	4	4	4	4	4	4	4
4	4	4	4	4	4	4	4	4	4	4	4	4	4	4	4	4	4	4	4	4	4	4	4	4	4	4	4	4	4	4	4	4	4	4	4	4	4	4	4	4	4	4	4	4	4	4	4	4	4
4	4	4	4	4	4	4	4	4	4	4	4	4	4	4	4	4	4	4	4	4	4	4	4	4	4	4	4	4	4	7	4	4	4	4	4	4	4	4	4	4	4	4	4	4	4	4	4	4	4
4	4	4	4	4	4	4	4	4	4	4	4	4	4	4	4	4	4	4	4	4	4	4	4	4	4	4	4	4	4	4	4	4	4	4	4	4	4	4	4	4	4	4	4	4	4	4	4	4	4
4	4	4	4	4	4	4	4	4	4	4	4	4	4	4	4	4	4	4	4	4	4	4	4	4	4	4	4	4	4	7	4	4	4	4	4	4	4	4	4	4	4	4	4	4	4	4	4	4	4
4	4	4	4	4	4	4	4	4	4	4	4	4	4	4	4	4	4	4	4	4	4	4	4	4	4	4	4	4	4	4	4	4	4	4	4	4	4	4	4	4	4	4	4	4	4	4	4	4	4
4	4	4	4	4	4	4	4	4	4	4	4	4	4	4	4	4	4	4	4	4	4	4	4	4	4	4	4	4	4	4	4	4	4	4	4	4	4	4	4	4	4	4	4	4	4	4	4	4	4
4	4	4	4	4	4	4	4	4	4	4	4	4	4	4	4	4	4	4	4	4	4	4	4	4	4	4	4	4	4	4	4	4	4	4	4	4	4	4	4	4	4	4	4	4	4	4	4	4	4
5	5	5	8	8	5	5	5	5	5	7	5	7	11	11	11	5	6	6	6	6	6	6	11	11	11	5	5	6	6	6	6	5	5	5	11	5	6	6	6	8	8	8	8	6	8	8	8	6	6
5	6	6	2	1	1	6	2	6	1	5	6	5	1	1	6	6	6	6	6	6	6	6	6	6	6	6	6	6	4	6	4	6	6	6	6	6	6	6	6	6	6	6	6	6	6	6	6	6	6
5	5	5	8	8	2	5	5	5	5	7	11	7	11	11	11	5	6	6	6	6	6	6	11	11	11	5	8	5	5	5	5	5	5	5	11	5	8	8	8	8	8	8	8	8	8	8	8	8	8
5	5	5	5	5	5	5	5	5	5	5	5	5	8	8	8	5	5	5	5	5	5	5	11	8	8	5	5	5	5	5	5	5	8	5	8	5	8	8	8	2	2	8	3	8	8	8	8	8	8
5	6	6	2	2	2	5	1	6	5	5	5	5	8	8	8	5	5	6	5	5	5	5	11	8	11	5	5	5	5	8	8	5	8	5	8	5	2	2	2	2	2	2	3	3	3	8	2	8	3
5	5	5	6	5	5	5	5	5	5	6	1	6	2	2	2	5	6	5	6	5	1	5	2	1	1	5	5	5	5	6	5	6	6	5	1	1	1	6	1	1	1	1	2	1	2	1	1	1	6
5	5	1	1	6	6	5	6	1	6	6	6	6	6	6	6	5	1	1	1	1	1	1	1	1	1	6	1	6	1	8	1	6	6	6	6	5	6	5	6	6	6	6	6	6	6	2	2	2	6
5	5	5	6	6	5	1	6	6	6	1	1	1	6	6	6	5	1	1	1	1	1	1	2	2	2	1	1	1	6	8	6	1	1	1	2	5	5	5	5	5	5	5	5	5	5	2	2	8	6
5	5	5	6	5	5	5	6	5	5	6	1	1	2	2	2	5	5	5	5	1	1	1	2	2	2	5	1	1	5	5	5	1	1	1	2	5	5	5	5	5	5	5	5	5	5	8	8	8	5
6	6	5	8	8	8	6	8	5	1	8	5	5	3	3	8	6	5	5	5	8	5	5	11	11	11	8	5	5	5	5	6	8	8	5	8	6	5	5	5	8	8	8	8	5	8	8	5	5	5
6	8	5	8	2	2	5	8	1	1	5	5	5	1	2	1	5	5	5	5	6	6	6	5	11	11	6	6	6	6	6	6	6	6	6	6	5	8	2	2	2	2	2	2	2	2	8	2	2	8
6	6	5	5	5	2	6	2	1	2	1	1	1	1	6	6	6	5	5	8	6	6	5	6	5	5	6	6	6	6	6	6	6	6	6	6	6	6	6	6	6	6	6	6	6	6	1	6	1	1
6	6	6	2	1	1	4	1	6	4	5	5	7	8	8	1	6	6	6	6	6	6	6	11	5	11	6	6	4	5	6	6	5	5	6	5	6	6	6	6	5	6	6	8	8	8	5	6	6	5
6	6	6	1	6	6	6	1	6	6	6	6	6	1	1	1	6	6	6	6	6	6	6	6	6	6	6	6	6	6	6	6	6	6	6	5	6	6	6	6	6	6	6	6	6	6	1	6	6	6
6	4	4	1	1	1	4	1	6	6	6	6	6	1	1	6	4	6	6	6	6	6	6	6	6	6	4	6	6	6	6	6	6	6	6	6	6	1	1	1	1	6	1	1	1	6	1	1	1	1
6	5	5	6	6	5	5	6	6	6	6	6	6	6	6	6	5	5	5	5	1	1	1	1	1	1	5	5	5	6	6	5	6	6	6	1	5	6	6	6	6	6	6	6	6	6	6	6	6	6
6	5	5	5	5	5	5	5	5	5	6	6	6	2	6	2	5	5	5	5	1	1	1	2	1	2	5	5	5	5	5	5	6	6	6	2	5	5	5	5	6	6	6	5	5	5	6	6	6	6
6	6	6	6	6	6	6	6	6	6	6	6	6	6	6	6	6	5	5	5	5	1	1	1	1	1	5	5	5	5	5	5	6	6	6	1	6	6	6	6	6	6	6	6	6	6	6	6	6	6
7	7	7	7	7	7	7	7	7	7	7	4	7	7	7	7	7	7	7	7	7	7	7	7	7	7	7	7	7	7	7	7	4	7	4	7	7	7	7	7	7	7	7	7	7	7	7	7	7	7
7	7	7	7	7	7	7	7	7	7	7	7	7	7	7	7	7	7	7	7	7	7	7	7	7	7	7	7	7	7	7	7	7	7	7	7	7	7	7	7	7	7	7	7	7	7	7	7	7	7
7	7	7	7	7	7	7	7	7	7	7	7	7	7	7	7	7	7	7	7	7	7	7	7	7	7	7	7	7	7	7	7	7	7	7	7	7	7	7	7	7	7	7	7	7	7	7	7	7	7
7	7	7	7	7	7	7	7	7	7	7	7	7	7	7	7	7	7	7	7	7	7	7	7	7	7	7	7	7	7	7	7	7	7	7	7	7	7	7	7	7	7	7	7	7	7	7	7	7	7
7	7	7	7	7	7	7	7	7	7	7	7	7	7	7	7	7	7	7	7	7	7	7	7	7	7	7	7	7	7	7	7	7	7	7	7	7	7	7	7	7	7	7	7	7	7	7	7	7	7
7	7	7	7	7	7	7	7	7	7	8	5	7	7	11	7	7	7	7	7	7	7	7	7	7	7	7	7	7	7	7	7	7	7	7	7	7	7	7	7	7	7	7	7	7	7	7	7	7	7
7	7	7	7	7	7	7	7	7	7	7	7	6	7	7	7	7	7	7	7	7	7	7	7	7	7	7	7	7	7	7	7	7	7	7	7	7	7	7	7	7	7	7	7	7	7	7	7	7	7
7	7	7	7	7	7	7	7	7	7	6	4	6	4	4	4	7	7	7	7	7	4	7	4	7	4	7	7	7	7	7	7	4	4	4	4	7	7	7	7	7	7	7	7	7	7	7	7	7	7
7	7	7	7	7	7	7	7	7	7	6	7	6	7	7	7	7	7	7	7	7	7	7	7	7	7	7	7	7	7	7	7	7	7	7	7	7	7	7	7	7	7	7	7	7	7	7	7	7	7
8	11	11	11	11	11	11	11	11	11	8	11	11	11	11	11	8	11	11	11	8	8	8	6	6	6	8	8	8	1	1	1	5	8	8	6	8	6	6	6	5	8	5	6	11	6	5	5	5	6
8	8	8	8	8	8	8	8	8	8	8	8	8	8	8	8	8	8	8	8	8	8	8	5	11	11	8	8	8	8	8	8	8	8	8	5	5	6	6	6	8	8	5	6	6	6	5	5	5	6
8	8	11	8	8	8	11	11	8	11	11	11	11	11	11	11	8	8	8	8	8	8	8	11	11	11	8	8	8	8	8	8	8	8	11	11	8	3	3	3	8	8	8	8	8	8	3	3	3	3
8	11	11	11	3	11	8	8	2	2	2	3	2	5	2	2	8	8	8	8	11	11	8	11	11	11	8	8	8	1	1	1	2	2	2	2	8	3	3	3	3	3	3	3	3	3	3	3	3	3
8	8	8	8	8	8	8	2	8	2	2	8	2	8	5	8	8	8	8	8	8	2	2	8	2	2	8	8	8	8	8	8	2	8	2	2	2	2	2	2	2	2	2	5	2	5	2	2	2	2
8	8	8	8	8	8	8	8	8	8	8	8	8	8	8	8	8	8	8	8	8	2	2	2	2	2	8	8	8	8	8	2	8	8	8	8	8	8	8	8	8	8	8	5	5	5	8	8	8	8
8	5	2	5	5	5	2	5	5	5	2	2	2	5	2	2	8	5	5	5	1	2	1	2	2	2	8	2	2	5	5	5	1	1	1	2	2	5	5	5	5	5	5	5	5	5	2	2	2	5
8	5	2	5	5	5	2	2	1	1	2	2	2	2	2	2	8	8	8	1	2	2	2	2	2	2	8	2	2	8	8	8	2	1	1	2	8	5	5	5	5	5	5	5	5	5	8	8	8	8
8	8	2	2	2	2	8	2	2	2	2	2	2	2	2	2	8	8	8	8	8	2	8	2	2	2	8	8	8	1	8	1	1	1	1	1	8	8	8	8	5	8	8	8	8	8	8	8	8	8
9	9	9	9	9	9	9	9	9	9	9	9	9	9	9	9	9	9	9	9	9	9	9	9	9	9	9	9	9	9	9	9	9	9	9	9	9	9	9	9	9	9	9	9	9	9	9	9	9	9
9	9	9	9	9	9	9	9	9	9	9	9	9	9	9	9	9	9	9	9	9	9	9	9	9	9	9	9	9	9	9	9	9	9	9	9	9	9	9	9	9	9	9	9	9	9	9	9	9	9
9	9	9	9	9	9	9	9	9	9	9	9	9	9	9	9	9	9	9	9	9	9	9	9	9	9	9	9	9	9	9	9	9	9	9	9	9	9	9	9	9	9	9	9	9	9	9	9	9	9
9	9	9	9	9	9	9	9	9	9	9	9	9	9	9	9	9	9	9	9	9	9	9	9	9	9	9	9	9	9	9	9	9	9	9	9	9	9	9	9	9	9	9	9	9	9	9	9	9	9
9	9	9	9	9	9	9	9	9	9	9	9	9	9	9	9	9	9	9	9	9	9	9	9	9	9	9	9	9	9	9	9	9	9	9	9	9	9	9	9	9	9	9	9	9	9	9	9	9	9
9	9	9	9	9	9	9	9	9	9	9	9	9	9	9	9	9	9	9	9	9	9	9	9	9	9	9	9	9	9	9	9	9	9	9	9	9	9	9	9	9	9	9	9	9	9	9	9	9	9
9	9	9	9	9	9	9	9	9	9	9	9	9	9	9	9	9	9	9	9	9	9	9	9	9	9	9	9	9	9	9	9	9	9	9	9	9	9	9	9	9	9	9	9	9	9	9	9	9	9
9	9	9	9	9	9	9	9	9	9	9	9	9	9	9	9	9	9	9	9	9	9	9	9	9	9	9	9	9	9	9	9	9	9	9	9	9	9	9	9	9	9	9	9	9	9	9	9	9	9
9	9	9	9	9	9	9	9	9	9	9	9	9	9	9	9	9	9	9	9	9	9	9	9	9	9	9	9	9	9	9	9	9	9	9	9	9	9	9	9	9	9	9	9	9	9	9	9	9	9
10	10	10	10	10	10	10	10	10	10	10	10	10	10	10	10	10	10	10	10	10	10	10	10	10	10	10	10	10	10	10	10	10	10	10	10	10	10	10	10	10	10	10	10	10	10	10	10	10	10
10	10	10	10	10	10	10	10	10	10	10	10	10	10	10	10	10	10	10	10	10	10	10	10	10	10	10	10	10	10	10	10	10	10	10	10	10	10	10	10	10	10	10	10	10	10	10	10	10	10
10	10	10	10	10	10	10	10	10	10	10	10	10	10	10	10	10	10	10	10	10	10	10	10	10	10	10	10	10	10	10	10	10	10	10	10	10	10	10	10	10	10	10	10	10	10	10	10	10	10
10	10	10	10	10	10	10	10	10	10	10	10	10	10	10	10	10	10	10	10	10	10	10	10	10	10	10	10	10	10	10	10	10	10	10	10	10	10	10	10	10	10	10	10	10	10	10	10	10	10
10	10	10	10	10	10	10	10	10	10	10	10	10	10	10	10	10	10	10	10	10	10	10	10	10	10	10	10	10	10	10	10	10	10	10	10	10	10	10	10	10	10	10	10	10	10	10	10	10	10
10	10	10	10	10	10	10	10	10	10	10	10	10	10	10	10	10	10	10	10	10	10	10	10	10	10	10	10	10	10	10	10	10	10	10	10	10	10	10	10	10	10	10	10	10	10	10	10	10	10
10	10	10	10	10	10	10	10	10	10	10	10	10	10	10	10	10	10	10	10	10	10	10	10	10	10	10	10	10	10	10	10	10	10	10	10	10	10	10	10	10	10	10	10	10	10	10	10	10	10
10	10	10	10	10	10	10	10	10	10	10	10	10	10	10	10	10	10	10	10	10	10	10	10	10	10	10	10	10	10	10	10	10	10	10	10	10	10	10	10	10	10	10	10	10	10	10	10	10	10
10	10	10	10	10	10	10	10	10	10	10	10	10	10	10	10	10	10	10	10	10	10	10	10	10	10	10	10	10	10	10	10	10	10	10	10	10	10	10	10	10	10	10	10	10	10	10	10	10	10
11	11	8	11	11	11	11	11	11	11	11	11	11	11	11	11	8	11	8	8	8	8	8	6	11	11	11	11	11	11	11	11	11	11	11	11	11	11	11	11	11	11	11	11	11	11	11	11	11	11
11	11	11	11	11	11	11	11	11	11	11	11	11	11	11	11	11	11	11	11	11	11	11	11	11	11	11	11	11	11	11	11	11	11	11	11	11	11	11	11	11	11	11	11	11	11	11	11	11	11
11	11	8	11	11	11	11	11	11	11	11	11	11	11	11	11	8	11	11	11	8	8	8	6	11	11	11	11	11	11	11	11	11	11	11	11	11	11	11	11	11	11	11	11	11	11	11	11	11	11
11	11	8	11	11	11	8	11	11	11	8	8	8	8	8	11	11	11	11	11	11	11	11	5	8	8	11	11	11	11	11	11	11	11	11	8	11	11	11	11	11	11	11	11	11	11	11	11	11	11
11	11	3	11	11	11	3	11	3	11	3	3	3	11	11	11	11	11	11	11	11	11	11	11	11	11	11	3	3	11	11	11	3	3	3	8	11	11	11	11	11	11	11	11	11	11	11	11	11	11
11	11	11	11	11	11	3	11	11	11	11	11	11	11	11	11	3	11	11	11	11	11	11	5	11	11	3	3	3	11	11	11	11	11	11	8	11	11	11	11	11	11	11	11	11	11	11	11	11	11
11	11	11	3	8	8	11	11	11	11	11	11	11	11	11	11	11	11	8	11	11	11	11	8	11	8	11	11	11	11	11	11	11	11	11	11	11	11	11	11	11	11	11	11	11	11	11	11	11	11
11	11	3	11	11	11	11	11	11	11	11	11	11	11	11	11	3	3	3	3	3	3	3	8	8	8	3	3	3	11	11	11	11	11	11	11	11	11	11	11	11	11	11	11	11	11	11	11	11	11
11	11	8	11	11	11	11	11	11	11	11	11	11	11	11	11	11	11	11	11	11	11	11	8	8	8	11	11	11	11	11	11	11	11	11	11	11	11	11	11	11	11	11	11	11	11	11	11	11	11
[truncated: 281 more columns]

## Sheet: 5 combinations
code	562	563	564	565	566	567	568	569	570	571	572	573	574	575	576	577	578	579	580	581	582	583	584	585	586	587	588	589	590	591	592	593	594	595	596	597	598	599	600	601	602	603	604	605	606	607	608	609	610
1	2	2	2	5	1	5	2	2	2	2	2	2	2	2	2	2	2	2	2	2	2	2	2	2	2	2	2	2	2	2	2	2	2	2	2	2	2	5	5	5	2	8	2	5	5	5	8	8	8
1	1	2	1	1	1	5	1	5	6	6	6	1	1	1	1	5	1	1	5	5	5	2	1	1	1	1	1	2	2	2	1	1	1	1	2	1	1	1	1	1	6	6	1	1	1	1	6	1	6
1	1	1	5	5	5	5	1	5	6	6	6	5	1	1	1	5	5	5	5	5	5	2	1	1	1	2	1	2	2	2	1	6	6	1	2	2	1	1	1	1	6	6	5	1	1	1	6	5	6
1	6	6	6	6	6	6	5	1	1	1	1	1	5	5	5	5	5	5	1	1	1	6	1	1	1	1	1	1	6	6	1	1	1	1	1	1	1	1	6	1	1	1	1	1	1	1	1	1	1
1	6	6	6	6	6	6	1	1	1	6	6	5	1	1	1	6	6	6	6	6	6	1	4	1	1	1	1	1	1	1	1	1	1	1	1	1	1	1	1	1	1	6	1	1	1	1	1	1	1
1	5	6	1	2	6	6	1	1	2	1	1	1	1	1	1	1	1	1	2	2	2	6	6	6	6	6	6	6	6	6	2	1	1	6	6	6	1	6	6	6	1	1	1	6	6	6	1	1	1
1	6	5	1	5	5	5	1	1	1	1	1	2	2	8	2	2	1	8	8	2	8	2	1	2	1	2	1	2	2	2	1	1	1	2	2	2	2	2	2	2	1	1	1	1	2	2	6	1	5
1	2	2	2	1	5	2	2	2	1	5	2	2	2	2	2	2	2	2	1	1	2	1	5	1	1	1	6	1	1	1	1	2	2	1	1	1	1	1	1	6	1	1	2	1	1	1	1	1	1
1	5	5	1	8	5	8	1	1	1	1	1	1	8	1	8	1	1	1	8	2	8	6	6	6	2	6	6	6	6	6	6	6	5	6	6	6	1	1	1	6	1	1	1	1	1	1	6	6	6
2	2	8	2	5	5	2	8	8	5	5	8	8	1	1	1	1	1	8	1	5	5	2	2	2	2	2	2	2	2	2	2	2	2	2	2	2	2	2	2	2	1	5	5	1	1	2	5	2	2
2	2	2	2	2	6	6	2	2	2	2	2	2	2	2	2	2	2	2	2	2	2	2	2	2	2	2	2	2	2	2	2	2	2	2	2	2	2	5	5	5	2	2	2	5	5	5	2	2	2
2	2	2	8	5	8	8	1	1	5	5	5	2	8	8	8	8	8	8	8	8	8	1	1	1	1	1	1	1	1	1	1	1	1	1	1	1	1	1	1	1	1	1	1	1	1	1	6	1	6
2	1	1	5	1	1	1	1	1	6	6	6	1	1	1	1	1	5	1	5	5	5	1	1	1	1	1	1	1	1	1	1	1	1	1	1	1	1	1	1	1	1	1	1	1	1	1	6	1	6
2	5	2	2	6	6	6	2	2	2	2	2	1	1	1	1	1	1	1	1	1	1	1	1	1	1	1	1	1	1	1	1	1	1	1	1	1	2	1	1	1	1	1	1	1	1	1	1	1	1
2	5	2	2	2	2	2	2	2	2	2	2	2	2	2	2	2	2	2	2	2	2	5	5	6	5	5	5	6	6	6	8	8	8	6	6	6	2	6	5	5	2	8	2	5	5	5	2	2	2
2	2	2	8	8	8	8	2	2	2	2	2	2	2	2	2	2	8	2	8	2	8	2	8	2	2	2	8	8	2	8	8	8	8	8	8	8	2	8	8	8	2	8	2	5	5	5	8	8	8
2	8	2	8	8	8	8	2	11	2	8	8	2	2	2	2	2	2	2	8	2	3	2	8	5	5	8	8	8	8	8	8	8	8	8	8	8	2	5	8	8	2	8	2	5	5	8	8	8	8
2	8	2	2	5	5	8	2	2	2	8	2	2	2	2	2	2	2	2	2	2	2	2	2	2	2	2	2	2	2	2	2	2	2	2	2	2	2	5	2	2	2	8	2	2	2	2	2	2	2
3	3	3	3	3	3	3	3	3	3	3	3	3	3	3	3	3	3	3	3	3	3	3	3	3	3	3	3	3	3	3	3	3	3	3	3	3	3	3	3	3	3	3	3	3	3	3	3	3	3
3	3	3	3	3	3	3	3	3	3	3	3	3	3	3	3	3	3	3	3	3	3	3	3	3	3	3	3	3	3	3	3	3	3	3	3	3	3	3	3	3	3	3	3	3	3	3	3	3	3
3	3	3	3	3	3	3	3	3	3	3	3	3	3	3	3	11	3	3	3	3	3	3	3	3	3	3	3	3	3	3	3	3	3	3	3	3	3	3	3	3	3	3	3	3	3	3	3	3	3
3	3	3	3	3	3	3	3	3	3	3	3	3	3	3	3	3	3	3	3	3	3	3	3	3	3	3	3	3	3	3	3	3	3	3	3	3	3	3	3	3	3	3	3	3	3	3	3	3	3
3	3	3	3	3	3	3	3	3	3	3	3	3	3	3	3	3	3	3	3	3	3	3	3	3	3	3	3	3	3	3	3	3	3	3	3	3	3	3	3	3	3	3	3	3	3	3	3	3	3
3	3	3	3	3	3	3	3	3	3	3	3	3	3	3	3	3	3	3	3	3	3	3	3	3	3	3	3	3	3	3	3	3	3	3	3	3	3	3	3	3	3	3	3	3	3	3	3	3	3
3	3	3	3	3	3	3	3	3	3	3	3	3	3	3	3	3	3	3	3	3	3	3	3	3	3	3	3	3	3	3	3	3	3	3	3	3	3	3	3	3	3	3	3	3	3	3	3	3	3
3	3	3	3	3	3	3	3	3	3	3	3	3	3	3	3	3	3	3	3	3	3	3	3	3	3	3	3	3	3	3	3	3	3	3	3	3	3	3	3	3	3	3	3	3	3	3	3	3	3
3	11	11	3	8	8	8	11	3	8	8	8	3	11	11	11	3	3	3	11	11	11	8	3	8	8	8	3	8	3	8	3	3	3	8	8	2	3	8	8	8	3	3	3	8	8	8	3	3	3
4	1	1	4	4	4	4	4	4	4	4	4	4	5	5	5	4	4	4	4	5	4	1	4	1	1	1	4	4	4	4	4	4	4	4	4	4	4	4	4	4	4	4	4	4	4	4	4	4	4
4	4	4	4	4	4	4	4	4	4	4	4	4	4	4	4	4	4	4	4	4	4	4	4	4	4	4	4	4	4	4	4	4	4	4	4	4	4	4	4	4	4	4	4	4	4	4	4	4	4
4	4	4	4	4	4	4	4	4	4	4	4	4	4	4	4	4	4	4	4	4	4	4	4	4	4	4	4	4	4	4	4	4	4	4	4	4	4	4	4	4	4	4	4	4	4	4	4	4	4
4	4	4	4	4	4	4	4	4	4	4	4	4	4	4	7	4	4	4	4	4	4	4	4	4	4	4	4	4	4	4	4	4	4	4	4	4	4	4	4	4	4	4	4	4	4	4	4	4	4
4	4	4	4	4	4	4	4	4	4	4	4	4	4	4	4	4	4	4	4	4	4	4	4	4	4	4	4	4	4	4	4	4	4	4	4	4	4	4	4	4	4	4	4	4	4	4	4	4	4
4	4	4	4	4	4	4	4	4	4	4	4	4	4	4	4	4	4	4	4	4	4	4	4	4	4	4	4	4	4	4	4	4	4	4	4	4	4	4	4	4	4	4	4	4	4	4	4	4	4
4	4	4	4	4	4	4	4	4	4	4	4	4	4	4	4	4	4	4	4	4	4	4	4	4	4	4	4	4	4	4	4	4	4	4	4	4	4	4	4	4	4	4	4	4	4	4	4	4	4
4	4	4	4	4	4	4	4	4	4	4	4	4	4	4	4	4	4	4	4	4	4	4	4	4	4	4	4	4	4	4	4	4	4	4	4	4	4	4	4	4	4	4	4	4	4	4	4	4	4
4	4	4	4	4	4	4	4	4	4	4	4	4	4	4	4	4	4	4	4	4	4	4	4	4	4	4	4	4	4	4	4	4	4	4	4	4	4	4	4	4	4	4	4	4	4	4	4	4	4
5	5	5	5	8	11	8	6	6	6	11	6	5	6	5	6	5	5	5	8	8	8	6	8	8	8	8	8	6	8	6	8	8	8	8	8	8	6	6	6	6	6	5	6	8	8	8	5	8	6
5	1	1	5	1	6	6	6	6	6	6	6	6	6	6	6	6	6	6	6	6	6	6	6	6	6	6	6	6	6	6	6	6	6	6	6	6	6	6	6	6	6	6	6	6	6	6	6	6	6
5	2	2	5	11	11	11	6	6	6	11	6	5	5	5	5	5	5	5	8	8	11	8	8	8	8	8	8	8	8	8	8	8	8	8	8	8	6	8	8	8	6	5	6	8	8	8	8	8	8
5	5	5	5	8	8	8	5	5	8	8	8	5	5	5	5	5	5	5	8	8	8	8	2	8	8	8	5	8	8	8	8	5	8	8	8	8	5	8	2	2	5	5	5	8	8	8	8	5	8
5	6	1	5	5	5	8	5	5	6	6	5	5	5	5	8	5	5	5	5	8	8	2	2	2	2	2	2	8	8	8	2	2	2	8	8	8	8	2	2	2	5	5	8	2	2	2	8	5	8
5	5	5	5	2	2	2	5	5	1	2	1	5	5	5	5	5	5	5	1	5	1	6	1	2	2	1	1	6	6	6	1	1	1	6	1	6	1	1	1	1	1	1	1	2	1	1	1	1	1
5	6	6	6	6	6	6	1	1	1	1	1	1	1	1	1	6	1	6	6	6	6	6	6	6	6	6	2	2	2	2	2	2	2	6	1	6	8	6	5	5	1	2	1	6	6	6	2	2	2
5	5	6	1	6	6	6	5	1	2	2	2	1	6	6	1	1	1	1	6	2	2	5	5	5	5	5	2	6	6	6	2	2	2	6	6	6	8	2	5	5	8	8	8	8	2	8	2	2	2
5	5	5	1	2	2	2	5	1	2	2	2	1	5	5	5	1	1	1	2	2	2	5	5	5	5	5	2	5	5	5	2	2	2	6	6	8	8	2	2	2	8	8	8	2	2	8	2	2	2
6	8	2	5	8	8	8	5	5	11	11	8	5	5	5	5	5	5	5	8	8	5	5	8	8	8	8	5	5	5	5	8	8	8	5	5	5	6	8	8	8	8	5	5	8	8	8	8	5	5
6	2	2	5	5	1	5	5	6	11	5	5	6	6	6	6	6	6	6	6	6	6	2	2	2	2	2	2	8	2	2	2	2	2	2	2	2	5	8	2	2	5	5	5	5	8	1	5	5	5
6	2	2	1	6	6	2	5	5	6	1	5	6	6	6	6	6	6	6	6	6	6	6	6	6	6	6	1	1	6	6	1	1	1	1	1	6	6	6	6	6	6	6	6	6	6	6	1	1	1
6	1	6	6	5	1	6	6	6	5	6	6	6	6	6	6	5	6	6	5	5	6	6	6	8	8	6	6	5	6	6	5	5	5	8	5	5	6	6	6	6	5	6	6	8	8	6	5	6	6
6	1	6	6	1	1	1	6	6	6	6	6	6	6	6	6	6	6	6	6	6	6	6	6	6	6	6	6	6	6	6	6	6	6	6	6	6	6	1	1	1	6	6	6	6	1	6	6	6	6
6	1	6	6	1	6	6	6	6	6	6	6	4	6	6	6	6	6	6	6	6	6	1	1	1	1	1	1	1	1	1	1	1	1	1	1	1	6	1	1	1	6	6	6	6	1	6	1	1	6
6	5	6	6	1	6	6	5	1	1	1	1	5	6	6	6	6	6	6	6	6	6	6	6	6	6	6	6	6	6	6	1	1	1	6	6	6	5	6	6	6	1	1	1	2	2	5	1	1	1
6	5	5	6	1	2	1	5	1	1	2	1	5	5	5	5	5	5	6	1	1	1	5	6	5	5	5	6	6	6	6	1	6	1	6	6	6	5	2	5	1	1	1	1	2	2	2	1	1	1
6	6	6	6	6	6	6	5	5	1	1	1	5	5	5	5	6	6	6	6	6	6	6	6	6	6	6	6	6	6	6	1	6	1	6	6	6	5	6	6	5	5	1	5	6	6	5	2	1	1
7	7	7	7	7	7	7	7	7	7	7	7	7	7	7	7	7	7	7	7	7	7	7	7	7	7	7	7	7	7	7	7	7	7	7	7	7	7	7	7	7	7	7	7	7	7	7	7	7	7
7	7	7	7	7	7	7	7	7	7	7	7	7	7	7	7	7	7	7	7	7	7	7	7	7	7	7	7	7	7	7	7	7	7	7	7	7	7	7	7	7	7	7	7	7	7	7	7	7	7
7	7	7	7	7	7	7	7	7	7	7	7	7	7	7	7	7	7	7	7	7	7	7	7	7	7	7	7	7	7	7	7	7	7	7	7	7	7	7	7	7	7	7	7	7	7	7	7	7	7
7	7	7	7	7	7	7	7	7	7	7	7	7	7	7	7	7	7	7	7	7	7	7	7	7	7	7	7	7	7	7	7	7	7	7	7	7	7	7	7	7	7	7	7	7	7	7	7	7	7
7	7	7	7	7	7	7	7	7	7	7	7	7	7	7	7	7	7	7	7	7	7	7	7	7	7	7	7	7	7	7	7	7	7	7	7	7	7	7	7	7	7	7	7	7	7	7	7	7	7
7	7	7	7	7	7	7	7	7	7	7	7	7	7	7	7	7	7	7	7	7	7	7	7	7	7	7	7	7	7	7	7	7	7	7	7	7	7	7	7	7	7	7	7	7	7	7	7	7	7
7	7	7	7	7	7	7	7	7	7	7	7	7	7	7	7	7	7	7	7	7	7	7	7	7	7	7	7	7	7	7	7	7	7	7	7	7	7	7	7	7	7	7	7	7	7	7	7	7	7
7	7	7	7	4	4	4	7	7	7	4	7	7	7	7	7	7	4	4	7	4	4	7	7	7	7	7	7	7	7	7	7	7	7	7	7	7	7	7	7	7	7	7	7	7	7	7	7	7	7
7	7	7	7	7	7	7	7	7	7	7	7	7	7	7	7	7	7	7	7	7	7	7	7	7	7	7	7	7	7	7	7	7	7	7	7	7	7	7	7	7	7	7	7	7	7	7	7	7	7
8	11	11	11	11	11	11	11	8	6	6	11	8	1	2	1	8	8	8	5	5	5	6	8	11	6	6	5	5	5	5	5	5	5	5	5	5	5	6	6	6	8	8	5	6	6	6	5	5	5
8	8	8	8	8	8	8	8	8	11	11	11	8	8	8	8	8	8	8	8	8	8	8	8	8	8	8	8	5	5	5	8	8	8	5	5	5	5	6	6	8	8	8	5	6	6	6	5	5	5
8	8	11	11	11	11	11	8	8	11	11	11	8	8	8	8	8	11	8	11	11	11	3	8	8	8	8	8	3	3	3	8	8	8	5	8	8	8	8	8	8	8	8	8	8	8	8	8	8	8
8	11	8	2	8	8	2	8	11	11	11	11	8	1	1	1	2	2	2	2	5	2	3	3	3	3	3	3	3	3	3	3	3	3	3	3	3	8	3	3	3	8	8	8	3	3	3	3	3	2
8	8	2	8	8	8	8	8	8	2	2	2	8	8	8	8	8	2	8	2	2	2	2	2	5	5	5	2	2	2	2	2	2	2	2	2	2	2	2	2	2	2	2	2	2	2	2	2	2	2
8	8	8	8	8	8	8	8	2	8	2	2	8	8	8	8	2	8	2	8	2	8	8	8	5	5	5	8	8	8	8	8	8	8	5	8	8	8	8	8	8	8	8	2	5	5	5	8	8	8
8	5	2	2	2	2	2	5	2	2	2	2	2	8	5	8	1	1	1	2	2	2	5	5	5	5	5	2	5	5	5	2	2	2	6	6	5	2	2	2	2	2	2	2	2	2	2	2	2	2
8	5	2	2	2	2	2	8	2	2	2	2	2	8	8	8	2	2	1	2	2	2	5	5	5	5	5	2	8	8	8	8	2	2	5	5	5	8	5	5	5	8	8	8	5	5	5	8	8	2
8	2	2	2	2	2	2	8	8	2	2	2	8	8	8	8	1	2	1	2	1	2	8	8	5	8	8	8	8	8	8	8	8	8	5	8	8	8	8	8	8	8	8	8	5	5	8	8	8	8
9	9	9	9	9	9	9	9	9	9	9	9	9	9	9	9	9	9	9	9	9	9	9	9	9	9	9	9	9	9	9	9	9	9	9	9	9	9	9	9	9	9	9	9	9	9	9	9	9	9
9	9	9	9	9	9	9	9	9	9	9	9	9	9	9	9	9	9	9	9	9	9	9	9	9	9	9	9	9	9	9	9	9	9	9	9	9	9	9	9	9	9	9	9	9	9	9	9	9	9
9	9	9	9	9	9	9	9	9	9	9	9	9	9	9	9	9	9	9	9	9	9	9	9	9	9	9	9	9	9	9	9	9	9	9	9	9	9	9	9	9	9	9	9	9	9	9	9	9	9
9	9	9	9	9	9	9	9	9	9	9	9	9	9	9	9	9	9	9	9	9	9	9	9	9	9	9	9	9	9	9	9	9	9	9	9	9	9	9	9	9	9	9	9	9	9	9	9	9	9
9	9	9	9	9	9	9	9	9	9	9	9	9	9	9	9	9	9	9	9	9	9	9	9	9	9	9	9	9	9	9	9	9	9	9	9	9	9	9	9	9	9	9	9	9	9	9	9	9	9
9	9	9	9	9	9	9	9	9	9	9	9	9	9	9	9	9	9	9	9	9	9	9	9	9	9	9	9	9	9	9	9	9	9	9	9	9	9	9	9	9	9	9	9	9	9	9	9	9	9
9	9	9	9	9	9	9	9	9	9	9	9	9	9	9	9	9	9	9	9	9	9	9	9	9	9	9	9	9	9	9	9	9	9	9	9	9	9	9	9	9	9	9	9	9	9	9	9	9	9
9	9	9	9	9	9	9	9	9	9	9	9	9	9	9	9	9	9	9	9	9	9	9	9	9	9	9	9	9	9	9	9	9	9	9	9	9	9	9	9	9	9	9	9	9	9	9	9	9	9
9	9	9	9	9	9	9	9	9	9	9	9	9	9	9	9	9	9	9	9	9	9	9	9	9	9	9	9	9	9	9	9	9	9	9	9	9	9	9	9	9	9	9	9	9	9	9	9	9	9
10	10	10	10	10	10	10	10	10	10	10	10	10	10	10	10	10	10	10	10	10	10	10	10	10	10	10	10	10	10	10	10	10	10	10	10	10	10	10	10	10	10	10	10	10	10	10	10	10	10
10	10	10	10	10	10	10	10	10	10	10	10	10	10	10	10	10	10	10	10	10	10	10	10	10	10	10	10	10	10	10	10	10	10	10	10	10	10	10	10	10	10	10	10	10	10	10	10	10	10
10	10	10	10	10	10	10	10	10	10	10	10	10	10	10	10	10	10	10	10	10	10	10	10	10	10	10	10	10	10	10	10	10	10	10	10	10	10	10	10	10	10	10	10	10	10	10	10	10	10
10	10	10	10	10	10	10	10	10	10	10	10	10	10	10	10	10	10	10	10	10	10	10	10	10	10	10	10	10	10	10	10	10	10	10	10	10	10	10	10	10	10	10	10	10	10	10	10	10	10
10	10	10	10	10	10	10	10	10	10	10	10	10	10	10	10	10	10	10	10	10	10	10	10	10	10	10	10	10	10	10	10	10	10	10	10	10	10	10	10	10	10	10	10	10	10	10	10	10	10
10	10	10	10	10	10	10	10	10	10	10	10	10	10	10	10	10	10	10	10	10	10	10	10	10	10	10	10	10	10	10	10	10	10	10	10	10	10	10	10	10	10	10	10	10	10	10	10	10	10
10	10	10	10	10	10	10	10	10	10	10	10	10	10	10	10	10	10	10	10	10	10	10	10	10	10	10	10	10	10	10	10	10	10	10	10	10	10	10	10	10	10	10	10	10	10	10	10	10	10
10	10	10	10	10	10	10	10	10	10	10	10	10	10	10	10	10	10	10	10	10	10	10	10	10	10	10	10	10	10	10	10	10	10	10	10	10	10	10	10	10	10	10	10	10	10	10	10	10	10
10	10	10	10	10	10	10	10	10	10	10	10	10	10	10	10	10	10	10	10	10	10	10	10	10	10	10	10	10	10	10	10	10	10	10	10	10	10	10	10	10	10	10	10	10	10	10	10	10	10
11	11	11	11	11	11	11	8	8	11	11	11	11	11	11	11	11	11	11	11	11	11	11	11	11	11	11	11	11	11	11	11	11	11	11	11	11	11	11	11	11	11	11	11	11	11	11	11	11	11
11	11	11	11	11	11	11	11	11	11	11	11	11	11	11	11	11	11	11	11	11	11	11	11	11	11	11	11	11	11	11	11	11	11	11	11	11	11	11	11	11	11	11	11	11	11	11	11	11	11
11	11	11	11	11	11	11	11	8	11	11	11	11	11	11	11	11	11	11	11	11	11	11	11	11	11	11	11	11	11	11	11	11	11	11	11	11	11	11	11	11	11	11	11	11	11	11	11	11	11
11	11	11	8	8	8	11	11	11	8	8	11	11	11	11	11	11	11	11	11	11	8	11	11	11	11	11	11	11	11	11	11	11	11	11	11	11	11	11	11	11	11	11	11	11	11	11	11	11	11
11	11	11	3	11	11	11	11	11	11	11	11	3	11	11	11	11	3	3	11	11	11	11	11	11	11	11	11	11	11	11	11	11	11	11	11	11	11	11	11	11	11	11	11	11	11	11	11	11	11
11	11	11	11	11	11	11	11	11	11	11	11	3	11	11	11	11	11	11	11	11	11	11	11	11	11	11	11	11	11	11	11	11	11	11	11	11	11	11	11	11	11	11	11	11	11	11	11	11	11
11	8	11	11	11	11	11	11	11	11	11	11	11	11	11	11	11	11	11	11	11	11	11	11	11	11	11	11	11	11	11	11	11	11	11	11	11	11	11	11	11	11	11	11	11	11	11	11	11	11
11	11	11	11	11	11	11	3	3	3	8	8	3	3	3	11	11	11	11	11	11	11	11	11	11	11	11	11	11	11	11	11	11	11	11	11	11	11	11	11	11	11	11	11	11	11	11	11	11	11
11	11	11	11	11	11	11	11	11	8	11	11	11	11	11	11	11	11	11	11	11	11	11	11	11	11	11	11	11	11	11	11	11	11	11	11	11	11	11	11	11	11	11	11	11	11	11	11	11	11
[truncated: 413 more columns]

## Sheet: 6 combinations
code	1024	1025	1026	1027	1028	1029	1030	1031	1032	1033	1034	1035	1036	1037	1038	1039	1040	1041	1042	1043	1044	1045	1046	1047	1048	1049	1050	1051	1052	1053	1054	1055	1056	1057	1058	1059	1060	1061	1062	1063	1064	1065	1066	1067	1068	1069	1070	1071	1072
1	5	2	2	2	2	2	2	2	2	2	2	2	2	5	2	5	5	8	2	5	5	5	8	8	8	8	8	8	1	1	1	1	1	1	2	2	1	1	1	2	1	1	1	2	2	2	1	2	1
1	5	6	1	1	5	1	5	1	2	1	1	1	1	1	1	1	1	1	6	1	1	1	6	6	6	1	1	1	6	6	1	1	1	1	1	1	6	6	6	1	6	6	6	1	1	1	6	6	6
1	5	6	1	5	5	5	5	1	2	6	1	1	1	1	5	1	1	1	6	1	1	1	6	6	6	1	1	6	6	6	5	6	6	6	1	6	6	6	6	5	6	6	6	5	5	5	6	6	6
1	6	1	5	5	5	1	1	1	6	1	1	1	1	1	1	1	1	1	1	1	1	1	1	1	1	1	1	1	1	1	1	1	1	1	6	1	1	1	1	1	1	1	1	1	1	1	1	1	1
1	6	6	1	6	6	6	6	1	1	1	1	1	1	1	1	1	1	1	1	1	1	1	1	1	1	1	1	1	1	6	1	1	1	1	1	1	1	1	1	6	6	6	6	1	1	1	1	1	1
1	2	1	1	1	1	1	1	6	6	1	6	6	6	6	1	6	6	6	1	1	6	6	1	1	1	2	1	1	1	6	1	6	6	6	1	1	1	1	1	1	1	6	1	1	1	1	1	1	1
1	1	1	2	1	2	2	2	1	2	1	1	1	2	2	1	1	1	2	6	2	2	2	6	6	6	1	2	1	1	1	1	1	1	1	1	1	1	1	1	1	1	1	1	1	1	1	1	1	1
1	2	2	2	2	1	2	2	1	1	2	1	1	1	6	1	1	6	6	1	1	1	1	1	1	2	1	1	1	6	1	1	1	6	6	1	1	1	1	1	1	1	1	1	1	1	1	1	1	1
1	2	1	1	1	2	1	2	6	6	6	6	6	6	1	1	1	1	1	6	6	6	6	6	6	5	6	6	6	1	1	1	1	1	1	1	1	1	1	1	1	1	1	1	1	1	1	1	1	1
2	2	8	1	8	1	1	1	2	2	2	2	2	2	5	2	1	5	5	5	2	2	2	1	1	1	1	1	1	8	8	8	8	8	8	8	8	8	11	11	8	8	8	8	8	8	8	8	8	8
2	5	2	2	2	2	2	2	2	2	2	2	2	2	5	2	5	5	5	2	2	2	2	2	2	2	2	2	2	2	2	2	5	2	5	11	2	2	2	2	2	2	2	2	2	2	2	2	2	2
2	8	1	8	8	2	8	8	1	1	6	1	1	1	1	1	1	1	1	6	1	1	1	6	6	6	1	1	1	2	5	8	5	8	5	8	8	5	5	5	8	8	8	8	8	8	8	8	8	8
2	1	6	1	1	1	5	1	1	1	1	1	1	1	1	1	1	1	1	6	1	1	1	6	6	6	1	1	1	6	6	5	5	5	5	1	5	6	6	6	5	5	5	5	5	5	5	5	5	5
2	6	2	1	1	1	1	1	1	1	1	1	1	1	1	2	1	2	2	1	1	1	1	1	1	1	1	1	1	5	6	2	6	6	6	8	2	2	2	2	2	6	2	2	2	2	2	2	2	2
2	2	2	2	2	2	2	2	5	5	8	6	6	5	5	2	5	8	5	2	6	6	5	2	2	2	8	5	8	5	2	2	2	2	2	2	2	2	2	2	2	2	2	2	2	2	2	2	2	2
2	8	2	2	2	2	8	2	2	2	8	8	5	8	8	2	5	5	8	8	8	8	8	8	8	8	8	8	8	6	1	2	1	6	1	2	2	1	1	1	2	1	1	1	2	2	2	2	1	1
2	8	8	2	2	2	8	2	5	8	8	8	8	8	8	2	5	8	8	8	8	8	8	8	8	8	8	8	8	5	5	2	2	2	2	2	2	2	2	2	2	2	2	2	2	2	2	2	2	2
2	2	2	2	2	2	8	2	2	2	2	2	2	2	2	2	2	2	2	2	2	2	2	2	2	2	2	2	2	5	6	2	2	2	5	2	2	2	2	2	2	2	2	2	2	2	2	2	2	2
3	3	3	3	3	3	3	3	3	3	3	3	3	3	3	3	3	3	3	3	3	3	3	3	3	3	3	3	3	3	3	3	3	3	3	3	3	3	3	3	3	3	3	3	3	3	3	3	3	3
3	3	3	3	3	3	3	3	3	3	3	3	3	3	3	3	3	3	3	3	3	3	3	3	3	3	3	3	3	3	3	3	3	3	3	3	3	3	3	3	3	3	3	3	3	3	3	3	3	3
3	3	3	3	3	3	3	3	3	3	3	3	3	3	3	3	3	3	3	3	3	3	3	3	3	3	3	3	3	3	3	3	3	3	3	3	3	3	3	3	3	3	3	3	11	3	3	3	3	3
3	3	3	3	3	3	3	3	3	3	3	3	3	3	3	3	3	3	3	3	3	3	3	3	3	3	3	3	3	3	3	3	3	3	3	3	3	3	3	3	3	3	3	3	3	3	3	3	3	3
3	3	3	3	3	3	3	3	3	3	3	3	3	3	3	3	3	3	3	3	3	3	3	3	3	3	3	3	3	3	3	3	3	3	3	3	3	3	3	3	3	3	3	3	3	3	3	3	3	3
3	3	3	3	3	3	3	3	3	3	3	3	3	3	3	3	3	3	3	3	3	3	3	3	3	3	3	3	3	3	3	3	3	3	3	3	3	3	3	3	3	3	3	3	3	3	3	3	3	3
3	3	3	3	3	3	3	3	3	3	3	3	3	3	3	3	3	3	3	3	3	3	3	3	3	3	3	3	3	3	3	3	3	3	3	3	3	3	3	3	3	3	3	3	3	3	3	3	3	3
3	3	3	3	3	3	3	3	3	3	3	3	3	3	3	3	3	3	3	3	3	3	3	3	3	3	3	3	3	8	3	3	8	8	8	3	3	3	3	3	3	3	3	3	3	3	3	3	3	3
3	11	11	3	3	11	11	11	8	8	3	8	8	8	8	3	8	8	8	3	8	8	8	3	3	3	8	8	8	11	8	8	8	8	5	3	3	8	8	8	3	11	8	8	3	3	3	8	8	8
4	4	4	6	4	5	4	4	1	4	4	4	4	4	4	4	4	4	4	4	4	4	4	4	4	4	4	4	4	1	4	4	4	4	4	4	4	4	4	4	4	4	4	4	4	4	4	4	4	4
4	4	4	4	4	4	4	4	4	4	4	4	4	4	4	4	4	4	4	4	4	4	4	4	4	4	4	4	4	4	4	4	4	4	4	4	4	4	4	4	4	4	4	4	4	4	4	4	4	4
4	4	4	4	4	4	4	4	4	4	4	4	4	4	4	4	4	4	4	4	4	4	4	4	4	4	4	4	4	4	4	4	4	4	4	4	4	4	4	4	4	4	4	4	4	4	4	4	4	4
4	4	4	4	4	4	4	4	4	4	4	4	4	4	4	4	4	4	4	4	4	4	4	4	4	4	4	4	4	4	4	4	4	4	4	4	4	4	4	4	4	4	4	4	4	4	4	4	4	4
4	4	4	4	4	4	4	4	4	4	4	4	4	4	4	4	4	4	4	4	4	4	4	4	4	4	4	4	4	4	4	4	4	4	4	4	4	4	4	4	4	4	4	4	4	4	4	4	4	4
4	4	4	4	4	4	4	4	4	4	4	4	4	4	4	4	4	4	4	4	4	4	4	4	4	4	4	4	4	4	4	4	4	4	4	4	4	4	4	4	4	4	4	4	4	4	4	4	4	4
4	4	4	4	4	4	4	4	4	4	4	4	4	4	4	4	4	4	4	4	4	4	4	4	4	4	4	4	4	4	4	4	4	4	4	4	4	4	4	4	4	4	4	4	4	4	4	4	4	4
4	4	4	4	4	4	4	4	4	4	4	4	4	4	4	4	4	4	4	4	4	4	4	4	4	4	4	4	4	4	4	4	4	4	4	4	4	4	4	4	4	4	4	4	4	4	4	4	4	4
4	4	4	4	4	4	4	4	4	4	4	4	4	4	4	4	4	4	4	4	4	4	4	4	4	4	4	4	4	4	4	4	4	4	4	4	4	4	4	4	4	4	4	4	4	4	4	4	4	4
5	8	6	5	5	5	8	5	8	8	8	8	8	8	6	6	8	8	8	5	8	8	8	5	8	5	8	8	8	8	11	11	8	8	8	6	6	5	5	5	5	8	8	8	5	5	5	8	8	11
5	6	6	6	6	6	6	6	6	6	6	6	6	6	6	6	6	6	6	6	6	1	6	6	6	6	6	6	6	11	6	5	8	6	5	6	6	6	6	6	6	6	6	6	5	6	5	6	5	6
5	11	6	5	5	8	8	8	8	8	8	8	8	8	8	6	8	8	8	8	8	8	8	5	8	5	8	8	8	8	11	11	11	11	11	5	5	8	11	11	8	8	11	11	8	11	5	11	11	11
5	2	5	5	5	5	5	8	8	8	5	8	8	8	2	5	8	2	8	5	8	8	8	5	5	5	8	8	8	8	8	5	8	8	8	5	5	8	8	8	5	8	8	8	5	5	5	8	8	8
5	5	6	5	5	5	5	5	2	2	5	8	2	8	2	5	2	2	2	5	8	8	8	5	5	5	8	8	8	2	5	5	8	5	8	5	5	5	5	5	5	5	5	5	5	5	5	5	8	5
5	2	1	5	5	5	1	5	2	6	1	2	6	6	1	1	1	1	1	1	1	2	1	6	1	6	1	1	1	2	8	5	2	8	2	5	5	2	2	2	5	8	8	8	5	5	5	8	8	8
5	6	1	1	1	6	6	6	6	2	2	2	6	6	5	1	6	6	6	2	2	2	2	2	2	2	2	2	2	1	6	1	1	1	1	1	1	1	1	1	6	6	6	6	1	1	1	1	1	1
5	6	1	1	1	6	6	1	5	6	2	6	6	6	2	8	2	2	2	2	2	2	2	2	2	2	2	2	2	1	6	1	6	6	6	1	1	1	1	1	1	1	1	1	1	1	1	1	1	1
5	2	2	5	1	1	2	2	5	5	2	6	8	5	2	8	2	2	2	2	8	8	8	2	2	2	8	2	8	6	2	1	2	2	2	5	1	2	2	2	1	2	2	2	1	1	1	2	2	2
6	8	8	5	5	8	5	5	8	5	8	8	8	8	8	5	8	8	8	5	8	8	5	8	8	8	8	8	8	8	8	5	8	8	8	5	5	8	8	8	5	8	8	8	8	5	5	8	8	8
6	5	5	6	6	6	6	6	2	2	5	2	2	2	2	5	5	5	5	5	5	2	2	5	5	5	1	2	1	11	8	5	8	5	5	5	5	5	11	11	6	5	5	6	5	5	5	5	5	5
6	6	5	6	6	6	6	6	6	6	1	1	1	2	6	6	6	6	6	1	1	1	1	1	1	1	1	1	1	8	2	2	2	2	2	5	5	8	5	8	6	6	2	8	6	5	5	2	5	2
6	6	6	6	6	6	6	6	6	6	5	5	5	5	6	6	8	6	6	6	5	6	6	5	5	5	5	5	5	6	1	6	5	5	6	6	6	6	6	6	6	6	6	6	6	6	6	5	6	6
6	6	6	6	6	6	6	6	1	6	6	6	6	6	1	6	1	1	1	6	1	6	1	6	6	6	6	1	6	1	1	6	1	1	1	6	6	1	1	1	6	1	1	1	6	6	6	1	1	1
6	6	6	6	6	6	6	6	1	1	1	1	1	1	1	6	1	1	1	1	1	1	1	6	6	6	1	1	1	1	1	6	1	1	1	6	6	6	6	6	6	6	6	6	6	6	6	1	6	6
6	6	1	6	6	6	6	6	6	6	1	6	6	6	6	1	2	2	1	1	2	2	2	1	1	1	2	1	2	1	1	1	1	1	1	5	1	1	1	1	6	6	1	1	1	1	1	1	1	1
6	1	1	5	5	1	1	1	5	6	1	6	6	6	2	1	2	2	2	1	2	2	2	1	1	1	2	2	2	1	1	1	1	1	1	6	1	1	1	1	1	1	1	1	1	1	1	1	1	1
6	6	1	5	6	6	6	5	6	6	1	6	6	6	5	5	2	2	5	1	2	2	2	1	1	1	2	2	6	1	1	1	1	1	1	6	1	1	1	1	6	1	1	1	1	1	1	1	1	1
7	7	7	7	7	7	7	7	7	7	7	7	7	7	7	7	7	7	7	7	7	7	7	7	7	7	7	7	7	7	7	7	7	7	7	7	7	7	7	7	7	7	7	7	7	7	7	7	7	7
7	7	7	7	7	7	7	7	7	7	7	7	7	7	7	7	7	7	7	7	7	7	7	7	7	7	7	7	7	7	7	7	7	7	7	7	7	7	7	7	7	7	7	7	7	7	7	7	7	7
7	7	7	7	7	7	7	7	7	7	7	7	7	7	7	7	7	7	7	7	7	7	7	7	7	7	7	7	7	7	7	7	7	7	7	7	7	7	7	7	7	7	7	7	7	7	7	7	7	7
7	7	7	7	7	7	7	7	7	7	7	7	7	7	7	7	7	7	7	7	7	7	7	7	7	7	7	7	7	7	7	7	7	7	7	7	7	7	7	7	7	7	7	7	7	7	7	7	7	7
7	7	7	7	7	7	7	7	7	7	7	7	7	7	7	7	7	7	7	7	7	7	7	7	7	7	7	7	7	7	7	7	7	7	7	7	7	7	7	7	7	7	7	7	7	7	7	7	7	7
7	7	7	7	7	7	7	7	7	7	7	7	7	7	7	7	7	7	7	7	7	7	7	7	7	7	7	7	7	7	7	7	7	7	7	7	7	7	7	7	7	7	7	7	7	7	7	7	7	7
7	7	7	7	7	7	7	7	7	7	7	7	7	7	7	7	7	7	7	7	7	7	7	7	7	7	7	7	7	7	7	7	7	7	7	7	7	7	7	7	7	7	7	7	7	7	7	7	7	7
7	7	7	7	7	7	7	7	7	7	7	7	7	7	7	7	7	7	7	7	7	7	7	7	7	7	7	7	7	7	7	4	4	4	4	7	4	7	7	7	7	7	7	7	7	4	4	4	4	4
7	7	7	7	7	7	7	7	7	7	7	7	7	7	7	7	7	7	7	7	7	7	7	7	7	7	7	7	7	7	7	7	7	7	7	7	7	7	7	7	7	7	7	7	7	7	7	7	7	7
8	11	11	1	8	1	1	1	11	5	8	5	5	5	6	8	6	6	6	8	5	5	5	5	8	5	5	5	5	11	11	11	11	11	11	11	8	11	11	11	8	8	11	11	8	11	11	11	11	11
8	8	11	8	8	8	8	8	8	5	8	5	5	5	8	5	8	8	8	8	5	5	5	8	8	8	5	5	5	11	3	11	3	3	3	8	8	11	11	11	8	8	8	8	8	8	8	11	8	11
8	11	11	8	8	8	11	11	8	3	8	8	8	8	8	8	8	8	8	8	3	3	3	8	8	8	8	8	8	8	11	11	11	11	11	8	8	5	5	5	2	11	11	11	8	8	8	5	5	11
8	8	11	8	8	5	2	5	3	3	3	3	3	3	3	8	3	3	3	3	3	3	2	2	3	2	3	3	2	11	8	3	3	3	8	8	8	11	11	11	8	5	8	5	8	8	8	8	8	8
8	8	2	8	8	8	2	2	5	2	2	2	2	2	2	2	2	2	2	2	2	2	2	2	2	2	2	2	2	5	2	2	5	8	2	8	2	2	2	2	8	2	2	2	8	8	2	2	2	2
8	8	8	8	2	2	8	2	5	8	8	8	8	8	8	8	5	8	5	8	8	8	8	8	8	8	8	5	8	5	8	8	5	8	8	8	2	2	2	2	2	2	8	2	2	8	2	8	2	8
8	2	2	8	1	2	2	2	5	5	2	6	5	5	2	2	2	2	2	2	2	2	2	2	2	2	2	2	2	5	2	2	2	2	2	5	2	2	2	2	2	2	2	2	2	2	2	2	2	2
8	2	2	8	2	2	2	2	5	5	2	5	5	5	2	8	5	5	2	2	8	8	5	2	2	2	8	5	5	5	2	2	2	2	2	8	2	2	2	2	2	2	2	2	2	2	2	2	2	2
8	2	2	8	2	1	2	2	5	8	8	5	5	8	8	8	5	8	8	8	5	8	8	2	8	8	5	5	8	5	2	2	2	2	2	8	2	2	2	2	2	5	2	2	2	2	2	2	2	2
9	9	9	9	9	9	9	9	9	9	9	9	9	9	9	9	9	9	9	9	9	9	9	9	9	9	9	9	9	9	9	9	9	9	9	9	9	9	9	9	9	9	9	9	9	9	9	9	9	9
9	9	9	9	9	9	9	9	9	9	9	9	9	9	9	9	9	9	9	9	9	9	9	9	9	9	9	9	9	9	9	9	9	9	9	9	9	9	9	9	9	9	9	9	9	9	9	9	9	9
9	9	9	9	9	9	9	9	9	9	9	9	9	9	9	9	9	9	9	9	9	9	9	9	9	9	9	9	9	9	9	9	9	9	9	9	9	9	9	9	9	9	9	9	9	9	9	9	9	9
9	9	9	9	9	9	9	9	9	9	9	9	9	9	9	9	9	9	9	9	9	9	9	9	9	9	9	9	9	9	9	9	9	9	9	9	9	9	9	9	9	9	9	9	9	9	9	9	9	9
9	9	9	9	9	9	9	9	9	9	9	9	9	9	9	9	9	9	9	9	9	9	9	9	9	9	9	9	9	9	9	9	9	9	9	9	9	9	9	9	9	9	9	9	9	9	9	9	9	9
9	9	9	9	9	9	9	9	9	9	9	9	9	9	9	9	9	9	9	9	9	9	9	9	9	9	9	9	9	9	9	9	9	9	9	9	9	9	9	9	9	9	9	9	9	9	9	9	9	9
9	9	9	9	9	9	9	9	9	9	9	9	9	9	9	9	9	9	9	9	9	9	9	9	9	9	9	9	9	9	9	9	9	9	9	9	9	9	9	9	9	9	9	9	9	9	9	9	9	9
9	9	9	9	9	9	9	9	9	9	9	9	9	9	9	9	9	9	9	9	9	9	9	9	9	9	9	9	9	9	9	9	9	9	9	9	9	9	9	9	9	9	9	9	9	9	9	9	9	9
9	9	9	9	9	9	9	9	9	9	9	9	9	9	9	9	9	9	9	9	9	9	9	9	9	9	9	9	9	9	9	9	9	9	9	9	9	9	9	9	9	9	9	9	9	9	9	9	9	9
10	10	10	10	10	10	10	10	10	10	10	10	10	10	10	10	10	10	10	10	10	10	10	10	10	10	10	10	10	10	10	10	10	10	10	10	10	10	10	10	10	10	10	10	10	10	10	10	10	10
10	10	10	10	10	10	10	10	10	10	10	10	10	10	10	10	10	10	10	10	10	10	10	10	10	10	10	10	10	10	10	10	10	10	10	10	10	10	10	10	10	10	10	10	10	10	10	10	10	10
10	10	10	10	10	10	10	10	10	10	10	10	10	10	10	10	10	10	10	10	10	10	10	10	10	10	10	10	10	10	10	10	10	10	10	10	10	10	10	10	10	10	10	10	10	10	10	10	10	10
10	10	10	10	10	10	10	10	10	10	10	10	10	10	10	10	10	10	10	10	10	10	10	10	10	10	10	10	10	10	10	10	10	10	10	10	10	10	10	10	10	10	10	10	10	10	10	10	10	10
10	10	10	10	10	10	10	10	10	10	10	10	10	10	10	10	10	10	10	10	10	10	10	10	10	10	10	10	10	10	10	10	10	10	10	10	10	10	10	10	10	10	10	10	10	10	10	10	10	10
10	10	10	10	10	10	10	10	10	10	10	10	10	10	10	10	10	10	10	10	10	10	10	10	10	10	10	10	10	10	10	10	10	10	10	10	10	10	10	10	10	10	10	10	10	10	10	10	10	10
10	10	10	10	10	10	10	10	10	10	10	10	10	10	10	10	10	10	10	10	10	10	10	10	10	10	10	10	10	10	10	10	10	10	10	10	10	10	10	10	10	10	10	10	10	10	10	10	10	10
10	10	10	10	10	10	10	10	10	10	10	10	10	10	10	10	10	10	10	10	10	10	10	10	10	10	10	10	10	10	10	10	10	10	10	10	10	10	10	10	10	10	10	10	10	10	10	10	10	10
10	10	10	10	10	10	10	10	10	10	10	10	10	10	10	10	10	10	10	10	10	10	10	10	10	10	10	10	10	10	10	10	10	10	10	10	10	10	10	10	10	10	10	10	10	10	10	10	10	10
11	11	11	11	11	11	11	11	11	11	11	11	11	11	11	11	11	11	11	11	11	11	11	11	11	11	11	11	11	11	11	11	11	11	11	1	8	5	6	6	11	11	11	11	11	5	5	11	11	11
11	11	11	11	11	11	11	11	11	11	11	11	11	11	11	11	11	11	11	11	11	11	11	11	11	11	11	11	11	11	11	11	11	11	11	11	11	11	11	11	11	11	11	11	11	11	11	11	11	11
11	11	11	11	11	11	11	11	11	11	11	11	11	11	11	11	11	11	11	11	11	11	11	11	11	11	11	11	11	11	11	11	11	11	11	11	8	11	11	11	11	11	11	11	11	11	11	11	11	11
11	8	11	11	11	11	11	11	11	11	11	11	11	11	11	11	11	11	11	11	11	11	11	11	11	11	11	11	11	11	11	11	11	11	11	11	11	11	11	11	11	11	8	11	11	11	3	11	11	11
11	11	11	11	3	11	11	11	11	11	11	11	11	11	11	11	11	11	11	11	11	11	11	11	11	11	11	11	11	11	11	3	11	11	11	11	11	11	11	11	3	11	8	11	3	3	3	11	11	11
11	11	11	11	11	11	11	11	11	11	11	11	11	11	11	11	11	11	11	11	11	11	11	11	11	11	11	11	11	11	11	11	11	11	11	3	11	11	11	11	3	11	11	11	11	11	11	11	11	11
11	11	11	11	11	11	11	11	11	11	11	11	11	11	11	11	11	11	11	11	11	11	11	11	11	11	11	11	11	8	11	11	11	11	11	2	11	8	8	8	11	11	11	11	11	11	11	11	11	11
11	11	3	3	11	11	11	11	11	11	11	11	11	11	11	11	11	11	11	11	11	11	11	11	11	11	11	11	11	8	11	11	11	11	11	11	3	8	8	8	11	11	11	11	11	11	11	11	11	11
11	11	11	11	11	11	11	11	11	11	11	11	11	11	11	11	11	11	11	11	11	11	11	11	11	11	11	11	11	11	11	11	11	11	11	2	11	8	8	8	11	11	11	11	11	11	11	11	11	11
[truncated: 413 more columns]

## Sheet: 7 combinations
code	1486	1487	1488	1489	1490	1491	1492	1493	1494	1495	1496	1497	1498	1499	1500	1501	1502	1503	1504	1505	1506	1507	1508	1509	1510	1511	1512	1513	1514	1515	1516	1517	1518	1519	1520	1521	1522	1523	1524	1525	1526	1527	1528	1529	1530	1531	1532	1533	1534
1	2	2	2	5	2	8	8	8	1	1	1	2	2	1	2	1	1	2	2	1	1	2	2	2	2	2	2	6	6	6	2	2	2	2	2	2	5	2	2	2	2	2	2	2	2	2	2	2	2
1	1	1	1	6	6	6	1	6	1	6	1	1	1	1	1	1	1	1	1	1	1	1	1	1	1	1	6	1	1	1	6	6	6	1	1	1	1	1	1	1	1	1	1	1	2	6	1	1	1
1	5	1	6	6	6	6	6	6	6	6	5	5	5	5	5	1	2	6	1	2	1	1	1	1	1	6	6	1	6	6	6	6	6	6	6	6	5	5	1	5	1	5	5	1	2	6	1	2	2
1	5	1	1	1	1	1	1	1	1	1	1	1	1	1	1	1	1	1	1	1	1	1	1	1	1	1	1	1	1	1	1	1	1	1	1	1	1	1	1	1	1	1	1	1	1	1	1	1	1
1	6	1	1	1	1	1	1	1	1	1	6	1	1	1	1	1	1	1	1	1	1	1	1	1	1	1	1	1	1	1	1	1	1	1	1	1	6	1	1	6	1	6	6	1	1	1	1	1	1
1	1	6	1	1	1	2	1	1	6	1	1	1	1	1	1	6	6	1	6	6	6	6	1	6	1	1	1	1	1	1	1	1	1	1	1	1	1	1	1	1	1	1	1	1	6	1	1	1	1
1	2	1	1	2	6	6	1	6	1	1	1	1	1	1	1	1	1	1	1	1	1	1	1	1	1	1	1	1	1	1	1	1	1	1	1	1	1	1	2	1	2	2	2	1	1	6	1	1	1
1	2	1	6	6	2	1	1	6	1	1	1	1	1	1	1	1	1	1	1	1	1	1	1	1	1	1	1	1	1	1	1	1	1	1	1	1	2	2	1	2	1	1	2	6	1	2	1	1	1
1	1	6	1	6	5	6	6	6	1	1	1	1	1	1	1	6	6	6	6	6	6	1	1	1	1	1	1	6	6	6	6	6	6	6	6	6	2	1	1	1	1	1	1	1	6	6	6	6	6
2	1	2	5	2	5	1	1	2	8	11	8	8	8	8	8	8	2	2	2	2	2	8	8	5	5	5	5	5	5	8	5	5	5	2	2	2	2	2	2	2	1	1	5	2	2	2	2	2	2
2	2	2	2	2	2	2	2	2	5	2	2	2	2	2	2	2	2	2	2	2	2	5	2	5	5	5	2	2	2	2	2	2	2	2	2	2	5	2	2	2	2	2	2	2	2	2	2	2	2
2	2	1	1	6	6	1	6	6	8	2	8	8	8	8	8	2	2	6	2	2	2	2	1	6	2	2	6	6	6	6	6	6	6	6	6	6	2	2	2	8	2	8	8	1	2	6	1	1	1
2	1	1	1	1	6	1	1	6	5	5	5	5	5	5	5	1	2	6	1	1	1	1	1	6	6	6	6	6	6	6	6	6	6	6	6	6	5	1	1	1	1	1	1	1	2	6	1	1	1
2	1	1	2	1	1	1	1	1	6	2	5	2	1	2	2	6	2	2	2	2	2	2	2	2	2	2	2	2	2	2	2	2	2	1	2	2	2	2	8	1	1	1	1	2	2	2	1	2	2
2	2	5	8	2	2	8	8	2	2	2	2	2	2	2	2	5	5	2	6	5	5	5	2	8	8	5	2	2	2	2	2	2	2	8	2	2	2	2	2	2	2	2	2	5	5	2	5	5	5
2	2	5	8	8	8	8	8	8	1	1	1	2	2	2	2	2	6	2	6	6	6	2	2	2	2	2	2	6	6	6	2	2	2	6	6	6	2	2	2	2	2	2	2	2	2	8	6	5	5
2	2	8	8	8	8	8	8	8	2	2	2	2	2	2	2	5	2	2	2	2	2	2	2	2	2	2	2	2	2	2	2	2	2	2	2	2	2	2	2	2	2	2	2	5	2	2	2	2	5
2	2	2	2	2	2	2	2	2	5	2	2	2	2	2	2	2	2	2	2	2	2	2	2	2	2	2	2	2	2	2	2	2	2	2	2	2	2	2	2	2	2	2	2	2	2	2	2	2	2
3	3	3	3	3	3	3	3	3	3	3	3	3	3	3	3	3	3	3	3	3	3	3	3	3	3	3	3	3	3	3	3	3	3	3	3	3	3	3	3	3	3	3	3	3	3	3	3	3	3
3	3	3	3	3	3	3	3	3	3	3	3	3	3	3	3	3	3	3	3	3	3	3	3	3	3	3	3	3	3	3	3	3	3	3	3	3	3	3	3	3	3	3	3	3	3	3	3	3	3
3	3	3	3	3	3	3	3	3	3	3	3	3	3	3	3	3	3	3	3	3	3	3	3	3	3	3	3	3	3	3	3	3	3	3	3	3	3	3	3	3	3	3	3	3	3	3	3	3	3
3	3	3	3	3	3	3	3	3	3	3	3	3	3	3	3	3	3	3	3	3	3	3	3	3	3	3	3	3	3	3	3	3	3	3	3	3	3	3	3	3	3	3	3	3	3	3	3	3	3
3	3	3	3	3	3	3	3	3	3	3	3	3	3	3	3	3	3	3	3	3	3	3	3	3	3	3	3	3	3	3	3	3	3	3	3	3	3	3	3	3	3	3	3	3	3	3	3	3	3
3	3	3	3	3	3	3	3	3	3	3	3	3	3	3	3	3	3	3	3	3	3	3	3	3	3	3	3	3	3	3	3	3	3	3	3	3	3	3	3	3	3	3	3	3	3	3	3	3	3
3	3	3	3	3	3	3	3	3	3	3	3	3	3	3	3	3	3	3	3	3	3	3	3	3	3	3	3	3	3	3	3	3	3	3	3	3	3	3	3	3	3	3	3	3	3	3	3	3	3
3	3	3	3	3	3	3	3	3	3	3	3	3	3	3	3	3	8	3	8	8	8	3	3	3	3	3	3	3	3	3	3	3	3	3	3	3	3	3	3	3	3	3	3	3	3	3	3	3	3
3	11	8	8	8	3	8	8	8	8	8	11	3	11	8	8	8	8	8	8	8	8	8	3	8	8	8	3	8	8	8	3	3	3	8	8	8	11	11	3	3	11	11	11	8	8	3	8	8	8
4	6	4	4	4	4	4	4	4	4	4	4	4	4	4	4	1	4	4	4	4	4	4	4	4	4	4	4	4	4	4	4	4	4	4	4	4	4	4	6	4	6	6	6	1	4	4	4	4	4
4	4	4	4	4	4	4	4	4	4	4	4	4	4	4	4	4	4	4	4	4	4	4	4	4	4	4	4	4	4	4	4	4	4	4	4	4	4	4	4	4	4	4	4	4	4	4	4	4	4
4	4	4	4	4	4	4	4	4	4	4	4	4	4	4	4	4	4	4	4	4	4	4	4	4	4	4	4	4	4	4	4	4	4	4	4	4	4	4	4	4	4	4	4	4	4	4	4	4	4
4	4	4	4	4	4	4	4	4	4	4	4	4	4	4	4	4	4	4	4	4	4	4	4	4	4	4	4	4	4	4	4	4	4	4	4	4	4	4	4	4	4	4	4	4	4	4	4	4	4
4	4	4	4	4	4	4	4	4	4	4	4	4	4	4	4	4	4	4	4	4	4	4	4	4	4	4	4	4	4	4	4	4	4	4	4	4	4	4	4	4	4	4	4	4	4	4	4	4	4
4	4	4	4	4	4	4	4	4	4	4	4	4	4	4	4	4	4	4	4	4	4	4	4	4	4	4	4	4	4	4	4	4	4	4	4	4	4	4	4	4	4	4	4	4	4	4	4	4	4
4	4	4	4	4	4	4	4	4	4	4	4	4	4	4	4	4	4	4	4	4	4	4	4	4	4	4	4	4	4	4	4	4	4	4	4	4	4	4	4	4	4	4	4	4	4	4	4	4	4
4	4	4	4	4	4	4	4	4	4	4	4	4	4	4	4	4	4	4	4	4	4	4	4	4	4	4	4	4	4	4	4	4	4	4	4	4	4	4	4	4	4	4	4	4	4	4	4	4	4
4	4	4	4	4	4	4	4	4	4	4	4	4	4	4	4	4	4	4	4	4	4	4	4	4	4	4	4	4	4	4	4	4	4	4	4	4	4	4	4	4	4	4	4	4	4	4	4	4	4
5	5	8	8	8	5	8	8	8	8	5	8	5	5	8	5	8	8	8	8	8	8	6	6	8	8	8	5	8	8	8	5	5	5	8	8	8	8	5	5	5	5	5	5	8	8	8	8	8	8
5	6	6	6	6	6	6	6	6	5	6	6	6	5	6	6	6	6	6	6	6	6	6	6	6	6	6	6	6	6	6	6	6	6	6	6	6	6	6	6	6	6	6	6	6	6	6	6	6	6
5	8	8	8	8	5	8	8	8	11	8	8	8	8	11	8	8	8	8	8	8	8	8	5	8	8	8	8	8	8	8	8	8	8	8	8	8	8	6	5	5	5	8	5	8	8	5	8	8	8
5	5	8	2	8	5	8	8	8	8	5	5	5	8	8	8	8	8	5	8	8	8	8	5	8	8	8	5	8	8	8	5	5	8	8	8	8	5	5	5	5	5	5	8	8	8	5	8	8	8
5	5	2	2	8	5	8	2	8	5	5	5	5	5	5	5	2	2	6	8	2	8	2	5	8	2	8	5	8	8	8	5	5	5	8	8	8	5	5	5	5	5	5	8	2	8	5	8	8	8
5	5	6	1	1	6	1	1	1	2	2	8	5	8	2	2	5	2	6	2	5	2	2	5	2	2	2	6	2	2	2	6	6	6	2	2	2	2	5	5	5	5	5	5	2	6	6	2	2	2
5	6	6	6	2	2	2	2	2	6	1	6	1	1	1	1	6	2	2	2	2	6	6	1	6	6	6	2	2	2	2	2	2	2	2	2	2	6	1	1	1	1	1	1	6	2	2	2	2	2
5	1	6	2	2	2	2	2	2	6	1	1	1	1	1	1	6	6	2	6	6	6	2	2	2	2	2	2	2	2	2	2	2	2	2	2	2	1	1	1	1	1	1	1	5	6	2	2	2	2
5	1	8	2	2	2	2	2	2	2	2	2	1	1	2	2	5	6	2	6	6	6	2	2	2	2	2	2	2	2	2	2	2	2	2	2	2	2	2	5	1	5	2	2	5	5	2	8	8	8
6	5	8	8	8	8	8	8	8	8	8	8	5	8	8	8	8	5	8	8	8	8	8	5	8	8	8	8	8	8	8	8	8	8	8	8	8	5	5	5	5	5	5	5	8	5	5	8	8	8
6	6	2	5	2	5	5	1	1	5	5	6	5	6	5	6	2	2	5	8	2	2	5	5	5	5	5	5	8	2	2	5	5	5	5	8	2	6	5	6	6	6	6	6	2	2	5	2	2	2
6	6	2	6	1	1	1	1	1	2	8	6	5	6	5	5	5	2	2	2	2	2	5	6	6	6	5	5	2	2	2	6	1	2	2	2	2	6	5	6	6	6	6	6	6	2	1	2	2	2
6	6	5	6	6	5	5	5	5	6	6	6	6	6	6	6	2	6	5	5	5	5	6	6	5	6	6	6	5	6	6	5	5	5	5	5	5	6	6	6	6	6	6	6	6	6	6	5	6	6
6	6	1	1	1	6	1	1	1	1	1	6	6	6	1	6	1	1	1	1	1	1	1	6	1	1	1	1	1	1	1	1	1	6	1	1	1	6	6	6	6	6	6	6	1	1	6	1	6	1
6	6	1	1	1	6	1	1	1	1	6	6	6	6	6	6	1	1	1	1	1	1	1	6	1	1	1	6	1	1	1	6	6	6	1	1	1	6	6	6	6	6	6	6	1	1	6	1	1	1
6	6	6	1	2	1	2	2	1	1	1	6	1	1	1	1	6	6	1	6	6	6	2	6	2	2	2	1	2	2	2	1	1	1	2	2	2	1	1	5	1	1	1	1	5	6	1	6	6	6
6	5	6	2	2	1	2	2	2	1	1	1	1	1	1	1	1	6	1	6	6	6	1	1	2	2	1	1	2	2	1	1	1	1	2	1	1	1	1	5	5	1	1	1	5	6	1	6	5	6
6	6	6	2	2	1	2	2	2	1	1	1	6	6	1	1	1	6	1	6	6	6	1	1	1	1	1	1	2	1	1	1	1	1	1	1	1	1	1	5	5	5	1	5	5	6	1	6	6	6
7	7	7	7	7	7	7	7	7	7	7	7	7	7	7	7	7	7	7	7	7	7	7	7	7	7	7	7	7	7	7	7	7	7	7	7	7	7	7	7	7	7	7	7	7	7	7	7	7	7
7	7	7	7	7	7	7	7	7	7	7	7	7	7	7	7	7	7	7	7	7	7	7	7	7	7	7	7	7	7	7	7	7	7	7	7	7	7	7	7	7	7	7	7	7	7	7	7	7	7
7	7	7	7	7	7	7	7	7	7	7	7	7	7	7	7	7	7	7	7	7	7	7	7	7	7	7	7	7	7	7	7	7	7	7	7	7	7	7	7	7	7	7	7	7	7	7	7	7	7
7	7	7	7	7	7	7	7	7	7	7	7	7	7	7	7	7	7	7	7	7	7	7	7	7	7	7	7	7	7	7	7	7	7	7	7	7	7	7	7	7	7	7	7	7	7	7	7	7	7
7	7	7	7	7	7	7	7	7	7	7	7	7	7	7	7	7	7	7	7	7	7	7	7	7	7	7	7	7	7	7	7	7	7	7	7	7	7	7	7	7	7	7	7	7	7	7	7	7	7
7	7	7	7	7	7	7	7	7	7	7	7	7	7	7	7	7	7	7	7	7	7	7	7	7	7	7	7	7	7	7	7	7	7	7	7	7	7	7	7	7	7	7	7	7	7	7	7	7	7
7	7	7	7	7	7	7	7	7	7	7	7	7	7	7	7	7	7	7	7	7	7	7	7	7	7	7	7	7	7	7	7	7	7	7	7	7	7	7	7	7	7	7	7	7	7	7	7	7	7
7	7	7	7	7	7	7	7	7	7	7	7	7	7	7	7	7	7	7	7	7	7	7	7	7	7	7	7	7	7	7	7	7	7	7	7	7	7	7	7	7	7	7	7	7	7	7	7	7	7
7	7	7	7	7	7	7	7	7	7	7	7	7	7	7	7	7	7	7	7	7	7	7	7	7	7	7	7	7	7	7	7	7	7	7	7	7	7	7	7	7	7	7	7	7	7	7	7	7	7
8	8	5	6	5	8	5	5	5	11	11	8	11	11	11	11	11	5	5	5	5	5	6	5	11	11	11	8	5	5	5	5	8	5	5	5	5	11	11	8	8	5	5	5	6	5	8	5	5	5
8	8	8	8	5	8	8	8	8	8	11	8	8	8	8	8	8	8	8	5	8	8	8	5	8	8	8	8	8	8	8	8	8	8	8	5	5	8	8	8	8	8	8	8	8	5	8	5	5	5
8	8	8	8	3	8	8	8	8	11	5	11	8	8	8	8	8	8	8	8	8	8	8	8	8	8	8	8	8	8	8	8	8	8	8	5	5	11	8	8	8	8	8	8	8	8	8	8	8	8
8	5	3	8	8	2	2	2	2	8	11	5	8	5	8	5	3	3	3	3	3	3	3	8	3	3	3	8	3	3	3	3	3	3	3	3	3	8	11	8	8	5	8	5	3	3	3	3	3	3
8	8	2	2	2	2	2	2	2	2	2	2	8	8	2	2	5	2	2	2	2	2	2	2	2	2	2	2	2	2	2	2	2	2	2	2	2	8	8	8	8	8	8	8	5	8	2	5	5	8
8	2	8	8	8	8	8	8	8	8	2	2	2	2	8	2	5	5	8	5	5	5	5	2	5	5	2	8	5	5	5	8	8	8	5	5	5	8	8	8	8	8	8	8	8	8	8	8	8	8
8	2	5	2	2	2	2	2	2	2	2	2	2	2	2	2	5	5	2	6	5	5	2	2	2	2	2	2	2	2	2	2	2	2	2	2	2	2	2	8	2	2	2	2	5	5	2	5	5	5
8	2	5	2	8	2	2	2	2	2	2	2	2	2	2	2	5	5	2	5	5	5	2	2	2	2	2	2	5	5	2	2	2	2	2	2	2	2	2	8	2	2	2	2	5	8	8	5	5	5
8	2	5	8	8	2	5	8	8	2	2	2	2	2	2	2	5	5	2	5	5	5	5	8	5	5	5	2	5	5	5	2	2	2	5	2	5	2	8	8	2	8	2	2	8	8	8	5	8	8
9	9	9	9	9	9	9	9	9	9	9	9	9	9	9	9	9	9	9	9	9	9	9	9	9	9	9	9	9	9	9	9	9	9	9	9	9	9	9	9	9	9	9	9	9	9	9	9	9	9
9	9	9	9	9	9	9	9	9	9	9	9	9	9	9	9	9	9	9	9	9	9	9	9	9	9	9	9	9	9	9	9	9	9	9	9	9	9	9	9	9	9	9	9	9	9	9	9	9	9
9	9	9	9	9	9	9	9	9	9	9	9	9	9	9	9	9	9	9	9	9	9	9	9	9	9	9	9	9	9	9	9	9	9	9	9	9	9	9	9	9	9	9	9	9	9	9	9	9	9
9	9	9	9	9	9	9	9	9	9	9	9	9	9	9	9	9	9	9	9	9	9	9	9	9	9	9	9	9	9	9	9	9	9	9	9	9	9	9	9	9	9	9	9	9	9	9	9	9	9
9	9	9	9	9	9	9	9	9	9	9	9	9	9	9	9	9	9	9	9	9	9	9	9	9	9	9	9	9	9	9	9	9	9	9	9	9	9	9	9	9	9	9	9	9	9	9	9	9	9
9	9	9	9	9	9	9	9	9	9	9	9	9	9	9	9	9	9	9	9	9	9	9	9	9	9	9	9	9	9	9	9	9	9	9	9	9	9	9	9	9	9	9	9	9	9	9	9	9	9
9	9	9	9	9	9	9	9	9	9	9	9	9	9	9	9	9	9	9	9	9	9	9	9	9	9	9	9	9	9	9	9	9	9	9	9	9	9	9	9	9	9	9	9	9	9	9	9	9	9
9	9	9	9	9	9	9	9	9	9	9	9	9	9	9	9	9	9	9	9	9	9	9	9	9	9	9	9	9	9	9	9	9	9	9	9	9	9	9	9	9	9	9	9	9	9	9	9	9	9
9	9	9	9	9	9	9	9	9	9	9	9	9	9	9	9	9	9	9	9	9	9	9	9	9	9	9	9	9	9	9	9	9	9	9	9	9	9	9	9	9	9	9	9	9	9	9	9	9	9
10	10	10	10	10	10	10	10	10	10	10	10	10	10	10	10	10	10	10	10	10	10	10	10	10	10	10	10	10	10	10	10	10	10	10	10	10	10	10	10	10	10	10	10	10	10	10	10	10	10
10	10	10	10	10	10	10	10	10	10	10	10	10	10	10	10	10	10	10	10	10	10	10	10	10	10	10	10	10	10	10	10	10	10	10	10	10	10	10	10	10	10	10	10	10	10	10	10	10	10
10	10	10	10	10	10	10	10	10	10	10	10	10	10	10	10	10	10	10	10	10	10	10	10	10	10	10	10	10	10	10	10	10	10	10	10	10	10	10	10	10	10	10	10	10	10	10	10	10	10
10	10	10	10	10	10	10	10	10	10	10	10	10	10	10	10	10	10	10	10	10	10	10	10	10	10	10	10	10	10	10	10	10	10	10	10	10	10	10	10	10	10	10	10	10	10	10	10	10	10
10	10	10	10	10	10	10	10	10	10	10	10	10	10	10	10	10	10	10	10	10	10	10	10	10	10	10	10	10	10	10	10	10	10	10	10	10	10	10	10	10	10	10	10	10	10	10	10	10	10
10	10	10	10	10	10	10	10	10	10	10	10	10	10	10	10	10	10	10	10	10	10	10	10	10	10	10	10	10	10	10	10	10	10	10	10	10	10	10	10	10	10	10	10	10	10	10	10	10	10
10	10	10	10	10	10	10	10	10	10	10	10	10	10	10	10	10	10	10	10	10	10	10	10	10	10	10	10	10	10	10	10	10	10	10	10	10	10	10	10	10	10	10	10	10	10	10	10	10	10
10	10	10	10	10	10	10	10	10	10	10	10	10	10	10	10	10	10	10	10	10	10	10	10	10	10	10	10	10	10	10	10	10	10	10	10	10	10	10	10	10	10	10	10	10	10	10	10	10	10
10	10	10	10	10	10	10	10	10	10	10	10	10	10	10	10	10	10	10	10	10	10	10	10	10	10	10	10	10	10	10	10	10	10	10	10	10	10	10	10	10	10	10	10	10	10	10	10	10	10
11	11	11	11	11	11	11	11	11	11	5	11	11	11	11	11	11	11	11	11	11	11	11	11	11	11	11	11	11	11	11	11	11	11	11	11	11	11	8	11	11	11	11	11	11	11	11	11	11	11
11	11	11	11	11	11	11	11	11	11	11	11	11	11	11	11	11	11	11	11	11	11	11	11	11	11	11	11	11	11	11	11	11	11	11	11	11	11	11	11	11	11	11	11	11	11	11	11	11	11
11	11	11	11	11	11	11	11	11	11	11	11	11	11	11	11	11	11	11	11	11	11	11	11	11	11	11	11	11	11	11	11	11	11	11	11	11	11	11	11	11	11	11	11	11	11	11	11	11	11
11	11	11	11	11	11	11	11	11	11	11	11	11	11	11	11	11	11	11	11	11	11	11	11	11	11	11	11	11	11	11	11	11	11	11	11	11	11	11	11	11	11	11	11	11	11	11	11	11	11
11	11	11	11	11	11	11	11	11	11	11	11	3	11	11	11	11	11	11	11	11	11	11	11	11	11	11	11	11	11	11	11	11	11	11	11	11	11	11	11	11	11	11	11	11	11	11	11	11	11
11	11	11	11	11	11	11	11	11	11	11	11	3	11	11	11	11	11	11	11	11	11	11	11	11	11	11	11	11	11	11	11	11	11	11	11	11	11	11	11	3	11	11	11	11	11	11	11	11	11
11	11	11	11	11	11	11	11	11	11	8	11	11	11	11	11	11	11	11	11	11	11	11	11	11	11	11	11	11	11	11	11	11	11	11	11	11	11	11	11	11	11	11	11	11	11	11	11	11	11
11	11	11	11	11	11	11	11	11	11	8	11	11	11	11	11	11	11	11	11	11	11	11	11	11	11	11	11	11	11	11	11	11	11	11	11	11	11	11	3	11	11	11	11	11	11	11	11	11	11
11	11	11	11	11	11	11	11	11	11	8	11	11	11	11	11	11	11	11	11	11	11	11	11	11	11	11	11	11	11	11	11	11	11	11	11	11	11	11	11	11	11	11	11	11	11	11	11	11	11
[truncated: 281 more columns]

## Sheet: 8 combinations
code	1816	1817	1818	1819	1820	1821	1822	1823	1824	1825	1826	1827	1828	1829	1830	1831	1832	1833	1834	1835	1836	1837	1838	1839	1840	1841	1842	1843	1844	1845	1846	1847	1848	1849	1850	1851	1852	1853	1854	1855	1856	1857	1858	1859	1860	1861	1862	1863	1864
1	2	2	1	2	2	2	2	2	2	2	2	2	2	2	2	2	2	1	1	2	2	2	1	2	1	1	2	1	1	1	2	2	2	2	2	2	2	2	2	2	2	2	2	2	2	2	2	2	2
1	6	1	1	1	6	6	1	1	6	1	1	1	6	6	6	6	6	1	1	1	1	1	1	1	1	1	1	1	1	1	1	1	1	1	1	6	1	1	6	6	6	6	1	1	1	1	6	6	6
1	6	5	1	6	6	6	6	6	6	1	6	6	6	6	6	6	6	5	6	1	5	1	5	5	6	2	6	1	6	6	6	1	6	6	6	6	6	6	6	6	6	6	6	6	6	1	6	6	5
1	1	1	1	1	1	1	1	1	1	1	1	1	1	1	1	1	1	1	1	1	1	1	1	1	1	1	1	1	1	1	1	1	1	1	1	1	1	1	1	1	1	1	1	1	1	1	1	1	6
1	1	1	1	1	1	1	1	1	1	6	1	1	1	1	1	1	1	1	1	6	1	1	1	1	1	1	1	1	1	1	1	1	1	1	1	1	1	1	1	1	1	1	1	1	1	5	6	1	6
1	1	1	6	1	1	1	1	1	1	1	1	1	1	1	1	1	1	1	1	1	1	1	1	1	1	1	1	1	1	1	1	1	1	1	1	1	1	1	1	1	1	1	1	1	1	1	1	1	1
1	6	1	1	1	1	1	1	1	1	2	1	1	6	1	1	1	1	1	1	1	1	1	1	1	1	1	1	1	1	1	1	1	1	1	1	1	1	1	1	1	1	1	1	1	1	2	1	1	2
1	1	1	1	1	1	1	1	1	1	2	6	1	1	1	1	1	1	1	1	1	1	1	1	1	1	1	1	1	1	1	1	1	1	1	1	1	1	1	1	1	1	1	1	1	1	2	1	1	1
1	5	1	6	1	6	1	6	6	6	1	6	1	6	1	6	6	6	1	1	1	1	1	1	1	1	6	1	6	6	6	1	1	1	1	1	1	1	1	1	1	1	1	1	6	6	2	5	1	5
2	6	8	2	5	5	5	5	5	5	1	2	5	6	5	6	6	6	8	8	8	8	8	8	8	5	2	2	2	2	2	5	8	5	5	5	5	5	5	5	5	5	5	6	6	5	2	2	2	2
2	2	2	2	5	2	2	2	2	2	2	2	2	2	2	2	2	2	2	2	2	2	2	2	2	6	2	2	2	2	2	2	2	2	2	2	2	2	2	2	2	2	2	2	2	2	2	2	2	2
2	6	8	6	6	6	6	6	6	6	2	6	1	6	6	6	6	6	8	2	2	8	2	8	8	2	2	6	6	6	6	2	1	6	2	2	6	6	6	6	6	5	6	6	6	6	2	6	1	5
2	6	1	1	6	6	6	6	6	6	1	1	6	6	6	6	6	6	5	5	5	5	8	5	5	6	2	6	6	6	6	6	5	6	6	6	6	6	6	6	6	6	6	6	6	6	1	6	6	5
2	1	1	2	2	2	2	2	2	2	1	2	2	2	1	1	1	1	2	2	5	2	1	2	2	2	2	2	2	2	2	2	2	2	2	2	2	2	2	2	2	2	2	2	2	2	1	1	1	1
2	2	2	5	8	2	2	2	2	2	2	5	2	2	2	2	2	2	2	2	2	2	2	2	2	5	5	2	5	5	5	8	2	8	8	8	2	2	2	2	2	2	2	2	2	2	2	5	2	2
2	8	2	6	2	6	2	2	2	2	2	5	2	5	8	8	8	8	1	1	2	2	2	2	2	2	6	2	6	6	6	2	2	2	2	2	2	6	6	6	2	2	2	2	2	2	2	8	2	8
2	8	2	2	2	2	2	2	2	2	2	5	2	2	2	2	8	8	2	2	2	2	2	2	2	2	2	2	2	2	2	2	2	2	2	2	2	2	2	2	2	2	2	2	2	2	2	8	2	8
2	2	2	2	2	2	2	2	2	2	2	2	2	2	2	2	2	2	2	2	2	2	2	2	2	2	2	2	2	2	2	2	2	2	2	2	2	2	2	2	2	2	2	2	2	2	2	2	2	2
3	3	3	3	3	3	3	3	3	3	3	3	3	3	3	3	3	3	3	3	3	3	3	3	3	3	3	3	3	3	3	3	3	3	3	3	3	3	3	3	3	3	3	3	3	3	3	3	3	3
3	3	3	3	3	3	3	3	3	3	3	3	3	3	3	3	3	3	3	3	3	3	3	3	3	3	3	3	3	3	3	3	3	3	3	3	3	3	3	3	3	3	3	3	3	3	3	3	3	3
3	3	3	3	3	3	3	3	3	3	3	3	3	3	3	3	3	3	3	3	3	3	3	3	3	3	3	3	3	3	3	3	3	3	3	3	3	3	3	3	3	3	3	3	3	3	3	3	3	3
3	3	3	3	3	3	3	3	3	3	3	3	3	3	3	3	3	3	3	3	3	3	3	3	3	3	3	3	3	3	3	3	3	3	3	3	3	3	3	3	3	3	3	3	3	3	3	3	3	3
3	3	3	3	3	3	3	3	3	3	3	3	3	3	3	3	3	3	3	3	3	3	3	3	3	3	3	3	3	3	3	3	3	3	3	3	3	3	3	3	3	3	3	3	3	3	3	3	3	3
3	3	3	3	3	3	3	3	3	3	3	3	3	3	3	3	3	3	3	3	3	3	3	3	3	3	3	3	3	3	3	3	3	3	3	3	3	3	3	3	3	3	3	3	3	3	3	3	3	3
3	3	3	3	3	3	3	3	3	3	3	3	3	3	3	3	3	3	3	3	3	3	3	3	3	3	3	3	3	3	3	3	3	3	3	3	3	3	3	3	3	3	3	3	3	3	3	3	3	3
3	3	3	8	3	3	3	3	3	3	3	3	3	3	3	3	3	3	3	3	3	3	3	3	3	3	3	3	8	8	8	3	3	3	3	3	3	3	3	3	3	3	3	3	3	3	3	3	3	3
3	8	11	8	8	8	3	8	8	8	11	8	8	3	3	8	8	8	8	8	11	3	11	11	11	8	8	8	8	8	8	8	3	8	8	8	3	8	8	8	3	3	3	8	8	8	11	8	8	3
4	4	4	4	4	4	4	4	4	4	6	4	4	4	4	4	4	4	4	4	4	4	4	4	4	1	4	4	4	4	4	4	4	4	4	4	4	4	4	4	4	4	4	4	4	4	6	4	4	4
4	4	4	4	4	4	4	4	4	4	4	4	4	4	4	4	4	4	4	4	4	4	4	4	4	4	4	4	4	4	4	4	4	4	4	4	4	4	4	4	4	4	4	4	4	4	4	4	4	4
4	4	4	4	4	4	4	4	4	4	4	4	4	4	4	4	4	4	4	4	4	4	4	4	4	4	4	4	4	4	4	4	4	4	4	4	4	4	4	4	4	4	4	4	4	4	4	4	4	4
4	4	4	4	4	4	4	4	4	4	4	4	4	4	4	4	4	4	4	4	4	4	4	4	4	4	4	4	4	4	4	4	4	4	4	4	4	4	4	4	4	4	4	4	4	4	4	4	4	4
4	4	4	4	4	4	4	4	4	4	4	4	4	4	4	4	4	4	4	4	4	4	4	4	4	4	4	4	4	4	4	4	4	4	4	4	4	4	4	4	4	4	4	4	4	4	4	4	4	4
4	4	4	4	4	4	4	4	4	4	4	4	4	4	4	4	4	4	4	4	4	4	4	4	4	4	4	4	4	4	4	4	4	4	4	4	4	4	4	4	4	4	4	4	4	4	4	4	4	4
4	4	4	4	4	4	4	4	4	4	4	4	4	4	4	4	4	4	4	4	4	4	4	4	4	4	4	4	4	4	4	4	4	4	4	4	4	4	4	4	4	4	4	4	4	4	4	4	4	4
4	4	4	4	4	4	4	4	4	4	4	4	4	4	4	4	4	4	4	4	4	4	4	4	4	4	4	4	4	4	4	4	4	4	4	4	4	4	4	4	4	4	4	4	4	4	4	4	4	4
4	4	4	4	4	4	4	4	4	4	4	4	4	4	4	4	4	4	4	4	4	4	4	4	4	4	4	4	4	4	4	4	4	4	4	4	4	4	4	4	4	4	4	4	4	4	4	4	4	4
5	8	5	8	8	8	5	8	8	8	5	8	8	8	5	8	8	8	8	5	5	5	5	5	5	8	8	5	8	8	8	6	6	8	8	5	5	8	8	8	5	5	5	8	8	8	5	8	8	8
5	6	6	6	6	6	6	6	6	6	6	6	6	6	6	6	6	6	5	6	6	6	5	6	6	6	6	6	6	6	6	6	6	6	6	6	6	6	6	6	6	6	6	6	6	6	6	6	6	6
5	8	8	8	8	8	8	8	8	8	5	8	8	8	5	8	8	8	11	5	8	5	8	8	8	8	8	8	8	8	8	8	5	8	8	8	8	8	8	8	5	8	5	8	8	8	5	8	8	8
5	8	5	8	8	8	5	8	8	8	5	8	5	8	5	8	8	8	8	5	5	5	5	5	8	8	8	5	8	8	8	8	5	8	8	8	5	8	8	8	5	5	5	8	8	8	5	8	2	8
5	5	5	2	2	8	6	8	5	8	5	2	5	8	5	8	5	8	5	5	5	5	5	5	5	2	8	6	8	8	8	8	5	8	5	8	5	8	8	8	5	5	5	8	8	8	5	2	2	2
5	1	5	2	2	2	6	2	2	2	5	2	1	6	6	6	1	1	2	5	5	5	5	5	5	2	2	6	2	2	2	2	5	2	2	2	6	2	2	2	6	6	6	2	2	2	5	1	1	1
5	2	1	2	2	2	2	2	2	2	1	2	2	2	2	2	2	2	1	1	6	1	1	1	1	6	2	2	2	2	2	2	2	2	2	2	2	2	2	2	2	2	2	2	2	2	5	1	6	1
5	2	1	2	2	2	2	2	2	2	1	2	2	2	2	2	2	2	1	1	1	1	1	1	1	2	2	2	2	2	2	2	2	2	2	2	2	2	2	2	2	2	2	2	2	2	5	2	2	2
5	2	1	2	2	2	2	2	2	2	5	8	2	2	2	2	2	2	2	2	2	1	1	2	2	2	2	2	2	2	2	2	8	2	2	2	2	2	2	2	2	2	2	2	2	2	5	2	2	2
6	8	5	8	8	8	8	8	8	8	5	8	8	8	5	8	8	8	8	5	5	5	5	5	5	8	5	5	8	8	8	8	5	8	8	8	8	8	8	8	8	5	5	8	8	8	5	8	8	5
6	5	6	2	5	5	5	5	5	5	6	2	5	5	6	5	5	5	5	5	6	6	6	6	6	8	2	5	8	2	2	5	5	5	5	5	5	5	5	5	5	5	5	5	5	5	6	2	5	5
6	1	6	2	5	2	6	2	2	2	6	2	6	2	6	1	1	1	5	5	6	6	6	6	5	6	2	2	2	2	2	5	6	6	6	5	5	2	2	2	6	6	5	2	2	2	6	1	6	1
6	5	6	5	6	6	5	5	5	5	6	6	6	6	6	5	6	6	6	6	6	6	6	6	6	6	6	6	5	6	6	6	6	6	6	6	6	6	6	6	6	6	6	5	6	6	6	5	6	6
6	1	6	1	1	1	6	1	1	1	6	1	1	1	6	1	1	1	1	6	6	6	6	6	6	1	1	1	1	1	1	1	6	1	1	1	1	1	1	1	6	6	6	1	1	1	6	6	6	6
6	1	6	1	1	1	6	1	1	1	6	1	1	1	6	1	1	1	6	6	6	6	6	6	6	1	1	6	1	1	1	1	6	1	6	6	6	1	1	1	6	6	6	1	1	1	6	1	6	6
6	1	1	6	2	2	1	2	2	1	1	1	2	2	1	2	2	1	1	1	6	1	1	1	1	6	6	1	6	6	6	2	5	2	2	2	2	2	2	2	1	1	1	2	2	2	6	1	1	1
6	2	1	1	1	1	1	1	2	1	5	2	2	2	1	2	2	2	1	1	1	1	1	1	1	2	6	1	1	6	1	2	1	2	2	2	1	2	2	2	1	1	1	2	2	2	5	1	1	1
6	2	6	1	1	1	1	1	1	1	5	2	2	2	1	2	2	2	1	1	1	1	6	1	1	1	6	1	6	6	1	2	1	2	2	2	1	2	2	2	1	1	1	2	2	2	6	1	1	1
7	7	7	7	7	7	7	7	7	7	7	7	7	7	7	7	7	7	7	7	7	7	7	7	7	7	7	7	7	7	7	7	7	7	7	7	7	7	7	7	7	7	7	7	7	7	7	7	7	7
7	7	7	7	7	7	7	7	7	7	7	7	7	7	7	7	7	7	7	7	7	7	7	7	7	7	7	7	7	7	7	7	7	7	7	7	7	7	7	7	7	7	7	7	7	7	7	7	7	7
7	7	7	7	7	7	7	7	7	7	7	7	7	7	7	7	7	7	7	7	7	7	7	7	7	7	7	7	7	7	7	7	7	7	7	7	7	7	7	7	7	7	7	7	7	7	7	7	7	7
7	7	7	7	7	7	7	7	7	7	7	7	7	7	7	7	7	7	7	7	7	7	7	7	7	7	7	7	7	7	7	7	7	7	7	7	7	7	7	7	7	7	7	7	7	7	7	7	7	7
7	7	7	7	7	7	7	7	7	7	7	7	7	7	7	7	7	7	7	7	7	7	7	7	7	7	7	7	7	7	7	7	7	7	7	7	7	7	7	7	7	7	7	7	7	7	7	7	7	7
7	7	7	7	7	7	7	7	7	7	7	7	7	7	7	7	7	7	7	7	7	7	7	7	7	7	7	7	7	7	7	7	7	7	7	7	7	7	7	7	7	7	7	7	7	7	7	7	7	7
7	7	7	7	7	7	7	7	7	7	7	7	7	7	7	7	7	7	7	7	7	7	7	7	7	7	7	7	7	7	7	7	7	7	7	7	7	7	7	7	7	7	7	7	7	7	7	7	7	7
7	7	7	7	7	7	7	7	7	7	7	7	7	7	7	7	7	7	7	7	7	7	7	7	7	7	7	7	7	7	7	7	7	7	7	7	7	7	7	7	7	7	7	7	7	7	7	7	7	7
7	7	7	7	7	7	7	7	7	7	7	7	7	7	7	7	7	7	7	7	7	7	7	7	7	7	7	7	7	7	7	7	7	7	7	7	7	7	7	7	7	7	7	7	7	7	7	7	7	7
8	5	11	5	11	5	8	5	5	5	8	5	6	5	8	5	5	5	11	11	8	8	8	11	11	11	5	5	5	5	5	6	5	11	6	6	8	5	5	5	5	8	5	5	5	5	8	5	6	5
8	8	8	8	8	8	8	8	8	8	8	8	8	5	8	8	8	8	8	11	8	8	8	8	8	8	8	8	8	8	8	8	5	8	8	8	8	8	8	8	8	8	8	8	8	8	8	8	8	8
8	8	8	8	8	8	8	8	8	8	8	8	8	8	8	8	8	8	8	8	2	8	8	8	8	8	8	8	8	8	8	8	8	8	8	8	8	8	8	8	8	8	8	8	8	8	8	8	8	8
8	2	5	3	8	5	2	3	3	3	8	3	8	8	2	5	5	2	8	11	5	8	5	8	5	3	3	3	3	3	3	8	8	8	3	8	8	5	5	5	3	3	3	3	3	3	8	3	8	2
8	2	8	2	2	2	2	2	2	2	8	5	2	5	2	5	5	2	8	8	8	8	8	8	8	5	2	2	2	5	2	2	2	5	2	2	2	5	5	2	2	2	2	5	2	2	8	2	2	2
8	8	2	5	2	8	8	8	8	8	8	8	8	8	8	8	8	8	8	8	8	8	2	8	2	5	5	8	5	5	5	8	2	5	8	5	8	8	8	8	8	8	8	8	5	8	2	8	8	8
8	2	2	5	2	2	2	2	2	2	2	5	2	2	2	2	2	2	2	2	2	2	2	2	2	5	5	2	5	5	5	2	2	2	2	2	2	2	2	2	2	2	2	2	2	2	2	2	2	2
8	2	2	5	2	2	2	2	2	2	2	5	8	8	8	8	8	8	2	2	2	2	2	2	2	5	5	2	5	5	5	2	2	2	2	2	2	5	5	5	2	2	2	8	5	5	8	2	2	2
8	2	2	5	5	5	2	2	5	2	8	8	8	8	8	8	8	8	2	2	8	2	8	2	2	5	5	8	5	5	5	8	8	5	8	8	8	5	8	8	8	8	8	5	5	8	8	2	8	2
9	9	9	9	9	9	9	9	9	9	9	9	9	9	9	9	9	9	9	9	9	9	9	9	9	9	9	9	9	9	9	9	9	9	9	9	9	9	9	9	9	9	9	9	9	9	9	9	9	9
9	9	9	9	9	9	9	9	9	9	9	9	9	9	9	9	9	9	9	9	9	9	9	9	9	9	9	9	9	9	9	9	9	9	9	9	9	9	9	9	9	9	9	9	9	9	9	9	9	9
9	9	9	9	9	9	9	9	9	9	9	9	9	9	9	9	9	9	9	9	9	9	9	9	9	9	9	9	9	9	9	9	9	9	9	9	9	9	9	9	9	9	9	9	9	9	9	9	9	9
9	9	9	9	9	9	9	9	9	9	9	9	9	9	9	9	9	9	9	9	9	9	9	9	9	9	9	9	9	9	9	9	9	9	9	9	9	9	9	9	9	9	9	9	9	9	9	9	9	9
9	9	9	9	9	9	9	9	9	9	9	9	9	9	9	9	9	9	9	9	9	9	9	9	9	9	9	9	9	9	9	9	9	9	9	9	9	9	9	9	9	9	9	9	9	9	9	9	9	9
9	9	9	9	9	9	9	9	9	9	9	9	9	9	9	9	9	9	9	9	9	9	9	9	9	9	9	9	9	9	9	9	9	9	9	9	9	9	9	9	9	9	9	9	9	9	9	9	9	9
9	9	9	9	9	9	9	9	9	9	9	9	9	9	9	9	9	9	9	9	9	9	9	9	9	9	9	9	9	9	9	9	9	9	9	9	9	9	9	9	9	9	9	9	9	9	9	9	9	9
9	9	9	9	9	9	9	9	9	9	9	9	9	9	9	9	9	9	9	9	9	9	9	9	9	9	9	9	9	9	9	9	9	9	9	9	9	9	9	9	9	9	9	9	9	9	9	9	9	9
9	9	9	9	9	9	9	9	9	9	9	9	9	9	9	9	9	9	9	9	9	9	9	9	9	9	9	9	9	9	9	9	9	9	9	9	9	9	9	9	9	9	9	9	9	9	9	9	9	9
10	10	10	10	10	10	10	10	10	10	10	10	10	10	10	10	10	10	10	10	10	10	10	10	10	10	10	10	10	10	10	10	10	10	10	10	10	10	10	10	10	10	10	10	10	10	10	10	10	10
10	10	10	10	10	10	10	10	10	10	10	10	10	10	10	10	10	10	10	10	10	10	10	10	10	10	10	10	10	10	10	10	10	10	10	10	10	10	10	10	10	10	10	10	10	10	10	10	10	10
10	10	10	10	10	10	10	10	10	10	10	10	10	10	10	10	10	10	10	10	10	10	10	10	10	10	10	10	10	10	10	10	10	10	10	10	10	10	10	10	10	10	10	10	10	10	10	10	10	10
10	10	10	10	10	10	10	10	10	10	10	10	10	10	10	10	10	10	10	10	10	10	10	10	10	10	10	10	10	10	10	10	10	10	10	10	10	10	10	10	10	10	10	10	10	10	10	10	10	10
10	10	10	10	10	10	10	10	10	10	10	10	10	10	10	10	10	10	10	10	10	10	10	10	10	10	10	10	10	10	10	10	10	10	10	10	10	10	10	10	10	10	10	10	10	10	10	10	10	10
10	10	10	10	10	10	10	10	10	10	10	10	10	10	10	10	10	10	10	10	10	10	10	10	10	10	10	10	10	10	10	10	10	10	10	10	10	10	10	10	10	10	10	10	10	10	10	10	10	10
10	10	10	10	10	10	10	10	10	10	10	10	10	10	10	10	10	10	10	10	10	10	10	10	10	10	10	10	10	10	10	10	10	10	10	10	10	10	10	10	10	10	10	10	10	10	10	10	10	10
10	10	10	10	10	10	10	10	10	10	10	10	10	10	10	10	10	10	10	10	10	10	10	10	10	10	10	10	10	10	10	10	10	10	10	10	10	10	10	10	10	10	10	10	10	10	10	10	10	10
10	10	10	10	10	10	10	10	10	10	10	10	10	10	10	10	10	10	10	10	10	10	10	10	10	10	10	10	10	10	10	10	10	10	10	10	10	10	10	10	10	10	10	10	10	10	10	10	10	10
11	11	11	11	11	11	11	11	11	11	11	11	11	11	11	11	11	11	11	5	11	11	11	11	11	11	11	11	11	11	11	11	11	11	11	11	11	11	11	11	11	11	11	11	11	11	11	11	11	11
11	11	11	11	11	11	11	11	11	11	11	11	11	11	11	11	11	11	11	11	11	11	11	11	11	11	11	11	11	11	11	11	11	11	11	11	11	11	11	11	11	11	11	11	11	11	11	11	11	11
11	11	11	11	11	11	11	11	11	11	11	11	11	11	11	11	11	11	11	11	11	11	11	11	11	11	11	11	11	11	11	11	11	11	11	11	11	11	11	11	11	11	11	11	11	11	11	11	11	11
11	11	11	11	11	11	11	11	11	11	11	11	11	11	11	11	11	11	11	11	11	11	11	11	11	11	11	11	11	11	11	11	11	11	11	11	11	11	11	11	11	11	11	11	11	11	11	11	11	11
11	11	11	11	11	11	11	11	11	11	11	11	11	11	11	11	11	11	11	11	11	3	11	11	11	11	11	11	11	11	11	11	11	11	11	11	11	11	11	11	11	11	11	11	11	11	11	11	11	11
11	11	11	11	11	11	11	11	11	11	11	11	11	11	11	11	11	11	11	11	11	3	11	11	11	11	11	11	11	11	11	11	11	11	11	11	11	11	11	11	11	11	11	11	11	11	11	11	11	11
11	11	11	11	11	11	11	11	11	11	11	11	11	11	11	11	11	11	11	8	11	11	11	11	11	11	11	11	11	11	11	11	11	11	11	11	11	11	11	11	11	11	11	11	11	11	11	11	11	11
11	11	11	11	11	11	11	11	11	11	11	11	11	11	11	11	11	11	11	8	11	11	11	11	11	11	11	11	11	11	11	11	11	11	11	11	11	11	11	11	11	11	11	11	11	11	11	11	11	11
11	11	11	11	11	11	11	11	11	11	11	11	11	11	11	11	11	11	11	8	11	11	11	11	11	11	11	11	11	11	11	11	11	11	11	11	11	11	11	11	11	11	11	11	11	11	11	11	11	11
[truncated: 116 more columns]

[truncated: 4 more sheets: 9 combinations, 10 combinations, 11 combinations, %prediction]
